# Supplementary material for: Transition-metal-free [3 + 2] cycloaddition of C,N-cycloazomethylimines with in situ formed isocyanates from dioxazolones: a facile synthesis of triazolinones
Source: Royal Society of Chemistry journal article supplement (doi:10.1039/d3gc04556k), 2024-01-01

## Supporting Information

### Transition-metal-free [3+2] cycloaddition of *C,N*-cycloazomethylimines with *in situ* formed isocyanates from dioxazolones: a facile synthesis of triazolinones

Lei Chen,<sup>a</sup> Peiyao Yang,<sup>a</sup> Qiuying Wang,<sup>a</sup> Zhongxiang Zhao,<sup>\*a</sup> Hui Cui<sup>\*a</sup> and Liping Zhu<sup>\*a</sup>

<sup>a</sup> School of Traditional Chinese Medicine, Guangzhou University of Chinese Medicine, Guangzhou, Guangdong 510006, China.

\* Corresponding author e-mail: [z zx37@gzucm.edu.cn](mailto:z zx37@gzucm.edu.cn); [cuihui@gzucm.edu.cn](mailto:cuihui@gzucm.edu.cn);  
[zhuliping@gzucm.edu.cn](mailto:zhuliping@gzucm.edu.cn)

#### Table of Contents

|                                                    |     |
|----------------------------------------------------|-----|
| 1. General information                             | S2  |
| 2. Details for condition optimization              | S2  |
| 3. General procedure and spectral data of products | S4  |
| 4. Scale-up experiment                             | S21 |
| 5. References                                      | S21 |
| 6. X-ray crystallographic data of <b>3cg</b>       | S22 |
| 7. NMR spectra of products                         | S23 |

## 1. General information

All reactions were performed under a nitrogen atmosphere and solvents were dried according to established procedures. Melting points were determined by a micro-melting point apparatus (SGW X-4A, Shanghai, China). Unless noted,  $^1\text{H}$  NMR,  $^{13}\text{C}$  NMR and  $^{19}\text{F}$  NMR spectra were recorded on a Bruker AVANCE-400 (400 MHz, 100 MHz and 376 MHz) spectrometer in  $\text{CDCl}_3$  using tetramethylsilane (TMS) as internal standard.  $^1\text{H}$  NMR spectra are referred to the TMS signal ( $\delta = 0$  ppm) and  $^{13}\text{C}$  NMR spectra are referred to the residual solvent signal ( $\delta = 77.0$  ppm). Data for  $^1\text{H}$  NMR are recorded as follows: chemical shift ( $\delta$ , ppm), multiplicity (s = singlet, d = doublet, t = triplet, m = multiplet, br = broad, coupling constant (s) in Hz, integration). Data for  $^{13}\text{C}$  NMR and  $^{19}\text{F}$  NMR are reported in terms of chemical shift ( $\delta$ , ppm). High resolution mass spectra (HRMS) were obtained by the ESI ionization sources.

**Materials:** *C,N*-cycloazomethylamines were synthesized according to the procedures.<sup>[1-2]</sup> dioxazolones were synthesized according to the procedures.<sup>[3-4]</sup>

## 2. Details for condition optimization

Table S1 Optimization of reaction conditions<sup>a</sup>

| 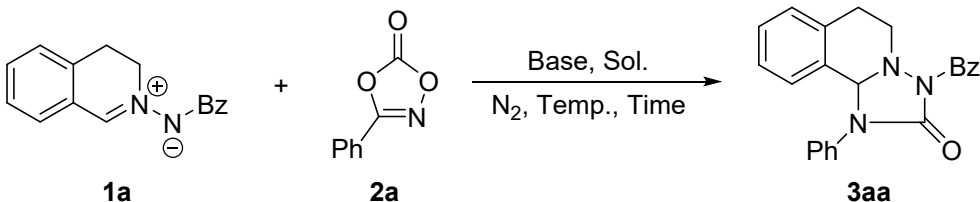 |       |          |      |         |                    |
|--------------------------------------------------------------------------------------|-------|----------|------|---------|--------------------|
|  |       |          |      |         |                    |
| Entry                                                                                | Temp. | Time (h) | Base | Solvent | Yield <sup>b</sup> |
| 1                                                                                    | 50    | 0.5      | KOH  | DCE     | 18                 |
| 2                                                                                    | 60    | 0.5      | KOH  | DCE     | 22                 |
| 3                                                                                    | 70    | 0.5      | KOH  | DCE     | 51                 |

|                 |           |            |                                 |                    |                            |
|-----------------|-----------|------------|---------------------------------|--------------------|----------------------------|
| 4               | 80        | 0.5        | KOH                             | DCE                | 46                         |
| 5               | 70        | 0.5        | /                               | DCE                | N.D.                       |
| 6               | 70        | 0.17       | KOH                             | DCE                | 28                         |
| 7               | 70        | 1          | KOH                             | DCE                | 51                         |
| 8               | 70        | 4          | KOH                             | DCE                | 18                         |
| 9               | 70        | 8          | KOH                             | DCE                | 2                          |
| 10              | 70        | 0.5        | LiOH                            | DCE                | 30                         |
| 11              | 70        | 0.5        | Cs <sub>2</sub> CO <sub>3</sub> | DCE                | 31                         |
| <b>12</b>       | <b>70</b> | <b>0.5</b> | <b>CH<sub>3</sub>ONa</b>        | <b>DCE</b>         | <b>86 (84<sup>c</sup>)</b> |
| 13              | 70        | 0.5        | <i>t</i> -BuONa                 | DCE                | 68                         |
| 14              | 70        | 0.5        | CH <sub>3</sub> ONa/LiOH        | DCE                | 64                         |
| 15              | 70        | 0.5        | DIPEA                           | DCE                | N.D.                       |
| 16              | 70        | 0.5        | DABCO                           | DCE                | N.D.                       |
| 17              | 70        | 0.5        | Et <sub>3</sub> N               | DCE                | 36                         |
| 18              | 70        | 0.5        | CH <sub>3</sub> ONa             | CHCl <sub>3</sub>  | 61                         |
| 19              | 70        | 0.5        | CH <sub>3</sub> ONa             | PhCl               | 56                         |
| 20              | 70        | 0.5        | CH <sub>3</sub> ONa             | THF                | 39                         |
| 21              | 70        | 0.5        | CH <sub>3</sub> ONa             | EA                 | 56                         |
| 22              | 70        | 0.5        | CH <sub>3</sub> ONa             | DMF                | 8                          |
| 23              | 70        | 0.5        | CH <sub>3</sub> ONa             | CH <sub>3</sub> OH | N.D.                       |
| 24              | 70        | 0.5        | CH <sub>3</sub> ONa             | DMSO               | N.D.                       |
| 25 <sup>d</sup> | 70        | 0.5        | CH <sub>3</sub> ONa             | DCE                | N.D.                       |
| 26 <sup>e</sup> | 70        | 0.5        | CH <sub>3</sub> ONa             | DCE                | 39                         |
| 27 <sup>f</sup> | 70        | 0.5        | CH <sub>3</sub> ONa             | DCE                | 21                         |
| 28 <sup>g</sup> | 70        | 0.5        | CH <sub>3</sub> ONa             | DCE                | 46                         |
| 29 <sup>h</sup> | 70        | 0.5        | CH <sub>3</sub> ONa             | DCE                | 38                         |
| 30 <sup>i</sup> | 70        | 0.5        | CH <sub>3</sub> ONa             | DCE                | 31                         |

<sup>a</sup> All reactions were carried out by using **1a** (0.10 mmol), **2a** (0.30 mmol), base (0.30 mmol), and solvent (1.0 mL) under nitrogen and stirred at specified temperature for 0.5 h, except as noted; <sup>b</sup> Yields were determined by <sup>1</sup>H NMR using mesitylene as an internal standard. N.D. = not detected; <sup>c</sup> Isolated yield; <sup>d</sup> Reaction was performed under aerobic conditions; <sup>e</sup> Using **C1** (20 mol%) as catalyst; <sup>f</sup> Using **C2** (20 mol%) as catalyst; <sup>g</sup> Using 18-crown-6 (20 mol%) as catalyst, Base amount: CH<sub>3</sub>ONa (3.0 equiv.); <sup>h</sup> Using 18-crown-6 (20 mol%) as catalyst, Base amount: CH<sub>3</sub>ONa (2.0 equiv.); <sup>i</sup> Using 18-crown-6 (20 mol%) as catalyst, Base amount: CH<sub>3</sub>ONa (1.0 equiv.).

### 3. General procedure and spectral data of products

#### 3.1 General procedure for the [3+2] cycloaddition of *C,N*-cycloazomethylimines with dioxazolones

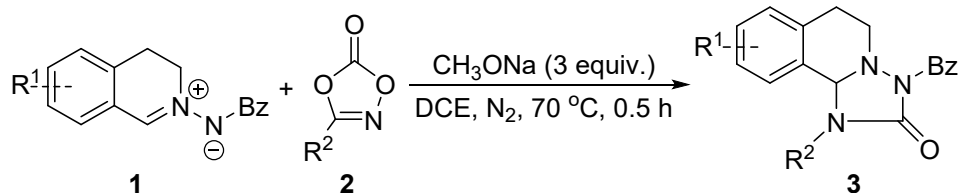

CH<sub>3</sub>ONa (0.6 mmol, 3.0 equiv) was added to a solution of *C,N*-cycloazomethylimine **1** (0.2 mmol, 1.0 equiv) and dioxazolone **2** (0.6 mmol, 3.0 equiv) in DCE (2.0 mL) under nitrogen atmosphere. The resulting suspension was stirred for 0.5 h at 70 °C. After the reaction was completed by TLC monitoring, the mixture was quenched with 1N NH<sub>4</sub>Cl and extracted with CH<sub>2</sub>Cl<sub>2</sub> 3 times. The combined organic layer was dried over Na<sub>2</sub>SO<sub>4</sub> and concentrated *in vacuo*. The residue was purified by silica gel column chromatography (PE/EtOAc = 5:1, add 1% Et<sub>3</sub>N) to afford product **3** which were summarized below.

#### 3.2 Characterization Data of Products

##### 3-benzoyl-1-phenyl-1,5,6,10*b*-tetrahydro-[1,2,4]triazolo[5,1-*a*]isoquinolin-2(3*H*)-one (**3aa**)

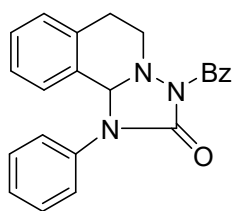

**3aa**

White solid (93 mg, 84%). m.p. 171–176 °C. <sup>1</sup>H NMR (400 MHz, CDCl<sub>3</sub>) δ 7.73 (dd, *J* = 5.2, 3.3 Hz, 2H), 7.53–7.47 (m, 1H), 7.45–7.39 (m, 2H), 7.35–7.29 (m, 3H), 7.25 (dt, *J* = 13.5, 6.1 Hz, 2H), 7.01–6.91 (m, 3H), 6.48 (d, *J* = 7.7 Hz, 1H), 6.03 (s, 1H), 3.73 (ddd, *J* = 10.6, 4.7, 3.7 Hz, 1H), 3.47 (td, *J* = 11.0, 3.5 Hz, 1H), 3.25 (ddd, *J* = 16.3, 11.3, 4.8 Hz, 1H), 3.00 (dt, *J* = 16.6, 3.5 Hz, 1H). <sup>13</sup>C NMR (100 MHz, CDCl<sub>3</sub>) δ 166.4, 152.5, 135.1, 134.6, 133.8, 131.6, 130.0, 129.4, 129.3 (2C), 128.9 (2C), 128.8 (2C), 128.5, 128.4, 127.8, 127.7 (2C), 125.8, 75.8, 47.7, 27.7. HRMS (ESI-TOF) *m/z*: Calcd for C<sub>23</sub>H<sub>19</sub>O<sub>2</sub>N<sub>3</sub> [M+H]<sup>+</sup> 370.1511; Found: 370.1550.

### 3-benzoyl-1-(2-methoxyphenyl)-1,5,6,10*b*-tetrahydro-[1,2,4]triazolo[5,1-*a*]isoquinolin-2(3*H*)-one

(3ab)

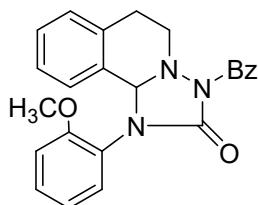

3ab

White solid (63 mg, 79%). m.p. 167-168 °C. <sup>1</sup>H NMR (400 MHz, CDCl<sub>3</sub>) δ 7.72 (dd, *J* = 5.2, 3.3 Hz, 2H), 7.51–7.46 (m, 1H), 7.43–7.38 (m, 2H), 7.34–7.29 (m, 1H), 7.23–7.17 (m, 2H), 6.97 (d, *J* = 8.2 Hz, 1H), 6.93–6.88 (m, 1H), 6.81 (dd, *J* = 16.8, 9.4 Hz, 2H), 6.39 (d, *J* = 7.8 Hz, 1H), 6.10 (s, 1H), 3.88 (s, 3H), 3.81–3.75 (m, 1H), 3.52–3.44 (m, 1H), 3.29 (ddd, *J* = 16.9, 12.2, 4.9 Hz, 1H), 2.95 (dt, *J* = 16.6, 3.0 Hz, 1H). <sup>13</sup>C NMR (100 MHz, CDCl<sub>3</sub>) δ 166.3, 156.2, 152.8, 134.8, 133.8, 131.9, 131.5, 130.3, 129.0, 128.9, 128.8 (2C), 128.3, 128.0, 127.6 (2C), 125.6, 123.2, 120.9, 111.7, 73.8, 55.7, 47.1, 27.9. HRMS (ESI-TOF) *m/z*: Calcd for C<sub>24</sub>H<sub>21</sub>O<sub>3</sub>N<sub>3</sub> [M+H]<sup>+</sup> 400.1656; Found: 400.1664.

### 3-benzoyl-1-(*m*-tolyl)-1,5,6,10*b*-tetrahydro-[1,2,4]triazolo[5,1-*a*]isoquinolin-2(3*H*)-one (3ac)

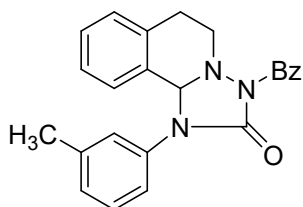

3ac

White solid (76 mg, 92%). m.p. 135-139 °C. <sup>1</sup>H NMR (400 MHz, CDCl<sub>3</sub>) δ 7.73 (dd, *J* = 5.2, 3.3 Hz, 2H), 7.50 (ddd, *J* = 6.6, 3.9, 1.3 Hz, 1H), 7.41 (dd, *J* = 10.3, 4.6 Hz, 2H), 7.30–7.21 (m, 2H), 7.19 (t, *J* = 7.7 Hz, 1H), 7.11 (d, *J* = 7.6 Hz, 1H), 6.97 (dd, *J* = 10.8, 4.1 Hz, 1H), 6.81 (s, 1H), 6.74 (d, *J* = 7.9 Hz, 1H), 6.50 (d, *J* = 7.7 Hz, 1H), 6.01 (s, 1H), 3.72 (ddd, *J* = 10.5, 4.7, 3.7 Hz, 1H), 3.46 (td, *J* = 11.0, 3.5 Hz, 1H), 3.25 (ddd, *J* = 16.3, 11.4, 4.8 Hz, 1H), 3.00 (dt, *J* = 16.6, 3.4 Hz, 1H), 2.27 (s, 3H). <sup>13</sup>C NMR (100 MHz, CDCl<sub>3</sub>) δ 166.4, 152.5, 139.2, 135.0, 134.4, 133.8, 131.5, 129.9, 129.3, 129.2, 129.1, 128.9, 128.8 (2C), 128.4, 127.8, 127.6 (2C), 125.7, 125.6, 75.6, 47.6, 27.6, 21.1. HRMS (ESI-TOF) *m/z*: Calcd for C<sub>24</sub>H<sub>21</sub>O<sub>2</sub>N<sub>3</sub> [M+H]<sup>+</sup> 384.1706; Found: 384.1691.

### 3-benzoyl-1-(3-fluorophenyl)-1,5,6,10*b*-tetrahydro-[1,2,4]triazolo[5,1-*a*]isoquinolin-2(3*H*)-one

(3ad)

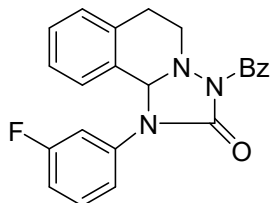

**3ad**

White solid (62 mg, 80%). m.p. 159-160 °C. <sup>1</sup>H NMR (400 MHz, CDCl<sub>3</sub>) δ 7.75–7.70 (m, 2H), 7.54–7.49 (m, 1H), 7.42 (dd, *J* = 10.3, 4.6 Hz, 2H), 7.32–7.22 (m, 3H), 7.04–6.98 (m, 2H), 6.78 (dd, *J* = 8.0, 1.0 Hz, 1H), 6.71 (dt, *J* = 9.4, 2.2 Hz, 1H), 6.55 (d, *J* = 7.7 Hz, 1H), 6.02 (s, 1H), 3.74–3.68 (m, 1H), 3.44 (td, *J* = 10.9, 3.5 Hz, 1H), 3.23 (ddd, *J* = 16.1, 11.1, 4.8 Hz, 1H), 3.00 (dt, *J* = 16.6, 3.5 Hz, 1H). <sup>13</sup>C NMR (100 MHz, CDCl<sub>3</sub>) δ 166.31, 163.83, 161.36, 152.32, 136.18, 136.08, 135.08, 133.59, 131.75, 130.27, 130.18, 129.82, 129.54, 128.79, 128.57, 127.73, 127.43, 125.88, 124.37, 124.34, 116.25, 116.02, 115.53, 115.32, 75.79, 47.78, 27.56. <sup>19</sup>F NMR (377 MHz, CDCl<sub>3</sub>) δ -111.1 (s). HRMS (ESI-TOF) *m/z*: Calcd for C<sub>23</sub>H<sub>18</sub>FO<sub>2</sub>N<sub>3</sub> [M+H]<sup>+</sup> 388.1456; Found: 388.1459.

### 3-benzoyl-1-(*p*-tolyl)-1,5,6,10*b*-tetrahydro-[1,2,4]triazolo[5,1-*a*]isoquinolin-2(3*H*)-one (3ae)

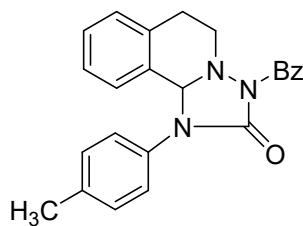

**3ae**

White solid (65 mg, 85%). m.p. 178-182 °C. <sup>1</sup>H NMR (400 MHz, CDCl<sub>3</sub>) δ 7.75–7.69 (m, 2H), 7.53–7.47 (m, 1H), 7.44–7.38 (m, 2H), 7.29–7.21 (m, 2H), 7.11 (d, *J* = 8.0 Hz, 2H), 6.98 (dd, *J* = 10.8, 4.0 Hz, 1H), 6.88–6.81 (m, 2H), 6.50 (d, *J* = 7.7 Hz, 1H), 5.99 (s, 1H), 3.72 (ddd, *J* = 10.5, 4.8, 3.5 Hz, 1H), 3.45 (td, *J* = 11.0, 3.4 Hz, 1H), 3.25 (ddd, *J* = 16.4, 11.5, 4.8 Hz, 1H), 2.99 (dt, *J* = 16.6, 3.4 Hz, 1H), 2.32 (s, 3H). <sup>13</sup>C NMR (100 MHz, CDCl<sub>3</sub>) δ 166.4, 152.6, 138.4, 135.0, 133.8, 131.9, 131.6, 129.9, 129.8 (2C), 129.2, 128.8 (2C), 128.6 (2C), 128.4, 127.8, 127.7 (2C), 125.8, 75.7, 47.6, 27.7, 21.2. HRMS (ESI-TOF) *m/z*: Calcd for C<sub>24</sub>H<sub>21</sub>O<sub>2</sub>N<sub>3</sub> [M+H]<sup>+</sup> 384.1706; Found: 384.1697.

**3-benzoyl-1-(4-methoxyphenyl)-1,5,6,10*b*-tetrahydro-[1,2,4]triazolo[5,1-*a*]isoquinolin-2(3*H*)-one**

**(3af)**

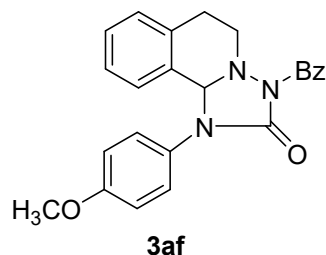

White solid (55 mg, 69%). m.p. 188-191 °C. <sup>1</sup>H NMR (400 MHz, CDCl<sub>3</sub>) δ 7.74–7.70 (m, 2H), 7.49 (t, *J* = 7.4 Hz, 1H), 7.41 (t, *J* = 7.6 Hz, 2H), 7.25 (dt, *J* = 18.7, 7.4 Hz, 2H), 6.97 (t, *J* = 7.4 Hz, 1H), 6.89–6.80 (m, 4H), 6.47 (d, *J* = 7.7 Hz, 1H), 5.94 (s, 1H), 3.76 (s, 3H), 3.74–3.68 (m, 1H), 3.42 (td, *J* = 11.1, 3.4 Hz, 1H), 3.24 (ddd, *J* = 16.4, 11.6, 4.8 Hz, 1H), 2.97 (dt, *J* = 16.5, 3.1 Hz, 1H). <sup>13</sup>C NMR (100 MHz, CDCl<sub>3</sub>) δ 166.3, 159.3, 152.6, 134.9, 133.7, 131.5, 130.1 (2C), 129.9, 129.2, 128.8 (2C), 128.4, 127.7, 127.6 (2C), 127.1, 125.7, 114.4 (2C), 75.6, 55.3, 47.5, 27.7. HRMS (ESI-TOF) *m/z*: Calcd for C<sub>24</sub>H<sub>21</sub>O<sub>3</sub>N<sub>3</sub> [M+H]<sup>+</sup> 400.1656; Found: 400.1656.

**3-benzoyl-1-(4-fluorophenyl)-1,5,6,10*b*-tetrahydro-[1,2,4]triazolo[5,1-*a*]isoquinolin-2(3*H*)-one**

**(3ag)**

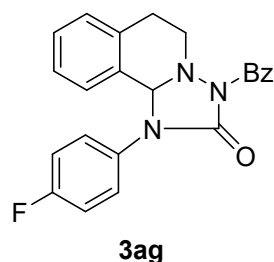

White solid (56 mg, 72%). m.p. 157-159 °C. <sup>1</sup>H NMR (400 MHz, CDCl<sub>3</sub>) δ 7.75–7.69 (m, 2H), 7.54–7.48 (m, 1H), 7.45–7.39 (m, 2H), 7.29 (td, *J* = 7.5, 1.1 Hz, 1H), 7.24 (d, *J* = 7.3 Hz, 1H), 7.04–6.97 (m, 3H), 6.96–6.90 (m, 2H), 6.46 (d, *J* = 7.7 Hz, 1H), 5.97 (s, 1H), 3.72 (ddd, *J* = 10.5, 4.8, 3.5 Hz, 1H), 3.43 (td, *J* = 11.0, 3.4 Hz, 1H), 3.25 (ddd, *J* = 16.4, 11.5, 4.8 Hz, 1H), 2.99 (dt, *J* = 16.6, 3.3 Hz, 1H). <sup>13</sup>C NMR (100MHz, CDCl<sub>3</sub>) δ 166.3, 163.4, 161.0, 152.6, 135.0, 133.6, 131.7, 130.8, 130.7, 129.8, 129.5, 128.8 (2C), 128.6, 127.7 (2C), 127.5, 125.8, 116.3, 116.1, 75.8, 47.7, 27.7. <sup>19</sup>F NMR (377 MHz, CDCl<sub>3</sub>) δ -112.3 (s). HRMS (ESI-TOF) *m/z*: Calcd for C<sub>23</sub>H<sub>18</sub>FO<sub>2</sub>N<sub>3</sub> [M+H]<sup>+</sup> 388.1456; Found:

388.1439.

**3-benzoyl-1-(4-chlorophenyl)-1,5,6,10*b*-tetrahydro-[1,2,4]triazolo[5,1-*a*]isoquinolin-2(3*H*)-one**

**(3ah)**

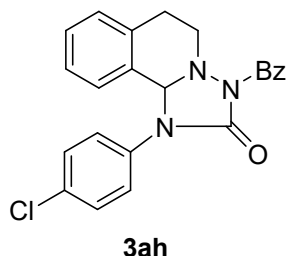

White solid (57 mg, 72%). m.p. 157-159 °C. <sup>1</sup>H NMR (400 MHz, CDCl<sub>3</sub>) δ 7.75–7.70 (m, 2H), 7.54–7.48 (m, 1H), 7.42 (t, *J* = 7.5 Hz, 2H), 7.32–7.27 (m, 3H), 7.24 (d, *J* = 7.5 Hz, 1H), 7.01 (t, *J* = 7.3 Hz, 1H), 6.93–6.86 (m, 2H), 6.51 (d, *J* = 7.7 Hz, 1H), 5.99 (s, 1H), 3.71 (ddd, *J* = 10.5, 4.7, 3.7 Hz, 1H), 3.43 (td, *J* = 11.0, 3.5 Hz, 1H), 3.23 (ddd, *J* = 16.3, 11.3, 4.8 Hz, 1H), 2.99 (dt, *J* = 16.6, 3.4 Hz, 1H). <sup>13</sup>C NMR (100MHz, CDCl<sub>3</sub>) δ 166.3, 152.4, 135.0, 134.2, 133.6, 133.1, 131.7, 130.1 (2C), 129.9, 129.5, 129.4 (2C), 128.8 (2C), 128.6, 127.7 (2C), 127.4, 125.9, 75.8, 47.7, 27.6. HRMS (ESI-TOF) *m/z*: Calcd for C<sub>23</sub>H<sub>18</sub>ClO<sub>2</sub>N<sub>3</sub> [M+H]<sup>+</sup> 404.1160; Found: 404.1161.

**3-benzoyl-1-(4-bromophenyl)-1,5,6,10*b*-tetrahydro-[1,2,4]triazolo[5,1-*a*]isoquinolin-2(3*H*)-one**

**(3ai)**

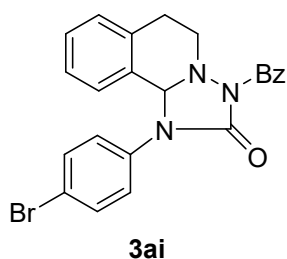

White solid (75 mg, 84%). m.p. 163-165 °C. <sup>1</sup>H NMR (400 MHz, CDCl<sub>3</sub>) δ 7.75–7.69 (m, 2H), 7.51 (dd, *J* = 8.4, 6.5 Hz, 1H), 7.46–7.39 (m, 4H), 7.33–7.28 (m, 1H), 7.24 (d, *J* = 7.8 Hz, 1H), 7.02 (t, *J* = 7.4 Hz, 1H), 6.87–6.79 (m, 2H), 6.52 (d, *J* = 7.7 Hz, 1H), 5.99 (s, 1H), 3.71 (dt, *J* = 8.4, 4.6 Hz, 1H), 3.43 (td, *J* = 11.0, 3.5 Hz, 1H), 3.24 (ddd, *J* = 16.2, 11.3, 4.8 Hz, 1H), 3.00 (dt, *J* = 16.6, 3.4 Hz, 1H). <sup>13</sup>C NMR (100MHz, CDCl<sub>3</sub>) δ 166.3, 152.3, 135.0, 133.7, 133.6, 132.4 (2C), 131.8, 130.3 (2C), 129.9, 129.5, 128.8 (2C), 128.6, 127.7 (2C), 127.4, 125.9, 122.2, 75.8, 47.7, 27.6. HRMS (ESI-TOF) *m/z*:



Calcd for C<sub>23</sub>H<sub>18</sub>BrO<sub>2</sub>N<sub>3</sub> [M+H]<sup>+</sup> 448,0655; Found: 448.0656.

**3-benzoyl-1-(4-(trifluoromethyl)phenyl)-1,5,6,10b-tetrahydro-[1,2,4]triazolo[5,1-a]isoquinolin-2(3H)-one (3aj)**

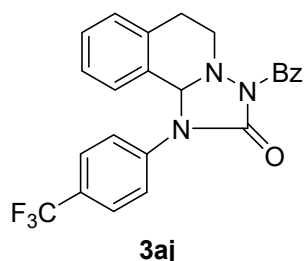

White solid (56 mg, 64%). m.p. 140-141 °C. <sup>1</sup>H NMR (400 MHz, CDCl<sub>3</sub>) δ 7.73 (dd, *J* = 5.2, 3.3 Hz, 2H), 7.57 (d, *J* = 8.4 Hz, 2H), 7.55–7.50 (m, 1H), 7.43 (dd, *J* = 10.4, 4.6 Hz, 2H), 7.32 (td, *J* = 7.6, 1.0 Hz, 1H), 7.28–7.24 (m, 1H), 7.10 (d, *J* = 8.3 Hz, 2H), 7.03 (t, *J* = 7.3 Hz, 1H), 6.55 (d, *J* = 7.7 Hz, 1H), 6.08 (s, 1H), 3.71 (dt, *J* = 10.8, 4.5 Hz, 1H), 3.47 (td, *J* = 10.9, 3.6 Hz, 1H), 3.22 (ddd, *J* = 16.0, 10.9, 4.8 Hz, 1H), 3.02 (dt, *J* = 16.7, 3.7 Hz, 1H). <sup>13</sup>C NMR (100 MHz, CDCl<sub>3</sub>) δ 166.3, 152.3, 138.0, 135.2, 133.5, 131.9, 129.9, 129.7, 128.8, 128.8, 128.7, 127.8, 127.4, 126.2, 126.2, 126.0, 75.9, 47.9, 27.5. <sup>19</sup>F NMR (377 MHz, CDCl<sub>3</sub>) δ -62.6 (s). HRMS (ESI-TOF) *m/z*: Calcd for C<sub>24</sub>H<sub>18</sub>FO<sub>2</sub>N<sub>3</sub> [M+H]<sup>+</sup> 438.1424; Found: 438.1427.

**3-benzoyl-1-(3,5-dimethylphenyl)-1,5,6,10b-tetrahydro-[1,2,4]triazolo[5,1-a]isoquinolin-2(3H)-one (3ak)**

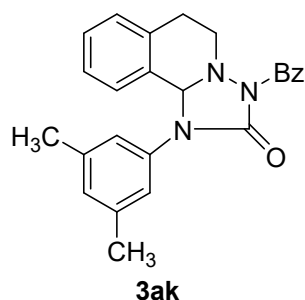

White solid (94.7 mg, 82 %). m.p. 150-155 °C. <sup>1</sup>H NMR (400 MHz, CDCl<sub>3</sub>) δ 7.74–7.70 (m, 2H), 7.49 (ddd, *J* = 6.6, 3.9, 1.3 Hz, 1H), 7.43–7.39 (m, 2H), 7.29–7.20 (m, 2H), 6.99–6.94 (m, 1H), 6.92 (s, 1H), 6.57 (s, 2H), 6.50 (d, *J* = 7.7 Hz, 1H), 5.99 (s, 1H), 3.71 (ddd, *J* = 10.5, 4.7, 3.6 Hz, 1H), 3.44 (td, *J* = 11.0, 3.4 Hz, 1H), 3.25 (ddd, *J* = 16.3, 11.4, 4.8 Hz, 1H), 2.99 (dt, *J* = 16.6, 3.4 Hz, 1H), 2.22 (s, 6H). <sup>13</sup>C NMR (100 MHz, CDCl<sub>3</sub>) δ 166.4, 152.5, 138.9 (2C), 135.0, 134.3, 133.8, 131.5, 130.1, 130.0,

129.2, 128.8 (2C), 128.4, 127.9, 127.7 (2C), 126.3 (2C), 125.6, 75.6, 47.6, 27.7, 21.1 (2C). HRMS (ESI-TOF)  $m/z$ : Calcd for  $C_{25}H_{23}O_2N_3$   $[M+H]^+$  398.1863; Found: 398.1853.

**3-benzoyl-1-(3,5-dichlorophenyl)-1,5,6,10*b*-tetrahydro-[1,2,4]triazolo[5,1-*a*]isoquinolin-2(3*H*)-one (3al)**

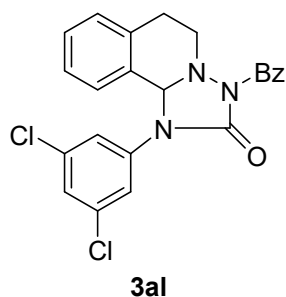

White solid (46 mg, 52 %). m.p. 145-147 °C.  $^1H$  NMR (400 MHz,  $CDCl_3$ )  $\delta$  7.72 (dd,  $J = 5.2, 3.4$  Hz, 2H), 7.56–7.51 (m, 1H), 7.44 (dd,  $J = 10.5, 4.6$  Hz, 2H), 7.34 (td,  $J = 7.5, 1.0$  Hz, 1H), 7.30–7.25 (m, 2H), 7.09 (t,  $J = 7.4$  Hz, 1H), 6.87 (d,  $J = 1.8$  Hz, 2H), 6.61 (d,  $J = 7.7$  Hz, 1H), 6.00 (s, 1H), 3.70 (dt,  $J = 8.6, 4.5$  Hz, 1H), 3.41 (td,  $J = 10.9, 3.6$  Hz, 1H), 3.23 (ddd,  $J = 16.1, 11.1, 4.8$  Hz, 1H), 3.01 (dt,  $J = 16.6, 3.6$  Hz, 1H).  $^{13}C$  NMR (100 MHz,  $CDCl_3$ )  $\delta$  166.2, 152.1, 136.6, 135.1 (2C), 133.4, 131.9, 129.9, 129.9, 128.8 (2C), 128.8, 128.4, 127.8 (2C), 127.1 (4C), 126.0, 75.9, 47.9, 27.5. HRMS (ESI-TOF)  $m/z$ : Calcd for  $C_{23}H_{17}Cl_2O_2N_3$   $[M+H]^+$  438.0771; Found: 438.0772.

**3-benzoyl-1-(naphthalen-1-yl)-1,5,6,10*b*-tetrahydro-[1,2,4]triazolo[5,1-*a*]isoquinolin-2(3*H*)-one (3am)**

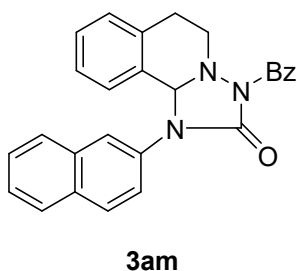

White solid (58 mg, 69%). m.p. 184-186 °C.  $^1H$  NMR (400 MHz,  $CDCl_3$ )  $\delta$  7.84–7.80 (m, 1H), 7.80–7.75 (m, 3H), 7.73–7.69 (m, 1H), 7.54–7.46 (m, 4H), 7.44 (t,  $J = 7.4$  Hz, 2H), 7.26 (d,  $J = 3.3$  Hz, 2H), 7.05 (dd,  $J = 8.7, 2.0$  Hz, 1H), 6.87 (td,  $J = 8.3, 3.8$  Hz, 1H), 6.49 (d,  $J = 7.7$  Hz, 1H), 6.13 (s, 1H), 3.77 (dt,  $J = 8.4, 4.5$  Hz, 1H), 3.54 (td,  $J = 11.0, 3.5$  Hz, 1H), 3.28 (ddd,  $J = 16.3, 11.3, 4.9$  Hz, 1H), 3.05

(dt,  $J = 16.6, 3.4$  Hz, 1H).  $^{13}\text{C}$  NMR (100 MHz,  $\text{CDCl}_3$ )  $\delta$  166.4, 152.6, 135.0, 133.8, 133.2, 132.6, 132.0, 131.6, 129.9, 129.3, 129.1, 128.8 (2C), 128.5, 127.9, 127.8, 127.7, 127.7 (2C), 127.6, 126.7, 126.5, 126.0, 125.8, 75.8, 47.7, 27.7. HRMS (ESI-TOF)  $m/z$ : Calcd for  $\text{C}_{27}\text{H}_{21}\text{O}_2\text{N}_3$   $[\text{M}+\text{H}]^+$  420.1706; Found: 420.1709.

### 3-benzoyl-1-(furan-2-yl)-1,5,6,10b-tetrahydro-[1,2,4]triazolo[5,1-a]isoquinolin-2(3H)-one (3an)

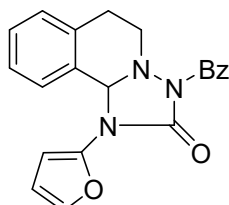

**3an**

White solid (65 mg, 91%). m.p. 165-166 °C.  $^1\text{H}$  NMR (400 MHz,  $\text{CDCl}_3$ )  $\delta$  7.72 (dd,  $J = 5.2, 3.3$  Hz, 2H), 7.51 (ddd,  $J = 6.7, 3.9, 1.2$  Hz, 1H), 7.42 (dd,  $J = 10.4, 4.6$  Hz, 2H), 7.31 (td,  $J = 7.6, 1.0$  Hz, 1H), 7.23 (d,  $J = 7.6$  Hz, 1H), 7.21 (dd,  $J = 5.6, 1.3$  Hz, 1H), 7.04 (t,  $J = 7.5$  Hz, 1H), 6.87 (dd,  $J = 5.6, 3.7$  Hz, 1H), 6.66 (d,  $J = 7.7$  Hz, 1H), 6.57 (dd,  $J = 3.7, 1.3$  Hz, 1H), 5.91 (s, 1H), 3.71 (ddd,  $J = 10.2, 4.7, 3.3$  Hz, 1H), 3.42–3.33 (m, 1H), 3.24 (ddd,  $J = 16.5, 11.7, 4.7$  Hz, 1H), 2.97 (dt,  $J = 16.5, 3.2$  Hz, 1H).  $^{13}\text{C}$  NMR (100 MHz,  $\text{CDCl}_3$ )  $\delta$  166.2, 152.4, 135.9, 135.0, 133.4, 131.8, 129.6, 129.5, 128.9 (2C), 128.4, 127.7 (2C), 127.2, 127.1, 125.9, 125.7, 125.7, 76.4, 47.8, 27.7. HRMS (ESI-TOF)  $m/z$ : Calcd for  $\text{C}_{21}\text{H}_{17}\text{O}_3\text{N}_3$   $[\text{M}+\text{H}]^+$  376.1114; Found: 376.1116.

### 3-benzoyl-1-(thiophen-2-yl)-1,5,6,10b-tetrahydro-[1,2,4]triazolo[5,1-a]isoquinolin-2(3H)-one (3ao)

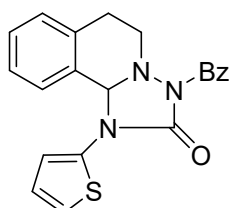

**3ao**

White solid (63 mg, 83%). m.p. 163-164 °C.  $^1\text{H}$  NMR (400 MHz,  $\text{CDCl}_3$ )  $\delta$  7.73 (dd,  $J = 5.2, 3.4$  Hz, 2H), 7.51 (ddd,  $J = 6.7, 3.9, 1.2$  Hz, 1H), 7.42 (dd,  $J = 10.5, 4.6$  Hz, 2H), 7.31 (td,  $J = 7.6, 0.9$  Hz, 1H), 7.24 (d,  $J = 7.6$  Hz, 1H), 7.21 (dd,  $J = 5.6, 1.3$  Hz, 1H), 7.04 (t,  $J = 7.5$  Hz, 1H), 6.87 (dd,  $J = 5.6, 3.7$  Hz, 1H), 6.66 (d,  $J = 7.7$  Hz, 1H), 6.58 (dd,  $J = 3.7, 1.3$  Hz, 1H), 5.92 (s, 1H), 3.71 (ddd,  $J = 10.2, 4.7,$

3.3 Hz, 1H), 3.42–3.33 (m, 1H), 3.25 (ddd,  $J = 16.5, 11.7, 4.7$  Hz, 1H), 2.98 (dt,  $J = 16.5, 3.2$  Hz, 1H).  $^{13}\text{C}$  NMR (100 MHz,  $\text{CDCl}_3$ )  $\delta$  166.1, 152.4, 135.8, 135.0, 133.4, 131.8, 129.6, 129.5, 128.9 (2C), 128.4, 127.7 (2C), 127.2, 127.1, 125.9, 125.7, 125.7, 76.4, 47.8, 27.7. HRMS (ESI-TOF)  $m/z$ : Calcd for  $\text{C}_{21}\text{H}_{17}\text{O}_2\text{N}_3\text{S}$   $[\text{M}+\text{H}]^+$  376.1114; Found: 376.1114.

### 3-benzoyl-1-benzyl-1,5,6,10*b*-tetrahydro-[1,2,4]triazolo[5,1-*a*]isoquinolin-2(3*H*)-one (3ap)

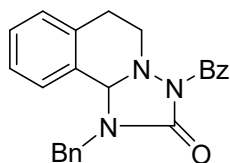

**3ap**

White solid (40 mg, 52%). m.p. 138–140 °C.  $^1\text{H}$  NMR (400 MHz,  $\text{CDCl}_3$ )  $\delta$  7.75–7.70 (m, 2H), 7.56–7.50 (m, 1H), 7.45 (t,  $J = 7.5$  Hz, 2H), 7.36–7.18 (m, 6H), 7.08 (d,  $J = 6.8$  Hz, 2H), 7.04 (d,  $J = 7.5$  Hz, 1H), 5.79 (s, 1H), 4.69 (d,  $J = 15.9$  Hz, 1H), 4.08 (d,  $J = 15.9$  Hz, 1H), 3.56 (dt,  $J = 10.7, 4.5$  Hz, 1H), 3.20 (td,  $J = 10.6, 3.5$  Hz, 1H), 3.08 (ddd,  $J = 15.1, 10.3, 4.4$  Hz, 1H), 2.87 (dt,  $J = 16.4, 3.8$  Hz, 1H).  $^{13}\text{C}$  NMR (100 MHz,  $\text{CDCl}_3$ )  $\delta$  166.3, 153.1, 135.9, 135.9, 133.8, 131.6, 129.5, 129.4, 128.8 (4C), 128.7 (2C), 127.7 (2C), 127.6, 127.4 (2C), 126.2, 72.4, 47.9, 44.6, 27.2. HRMS (ESI-TOF)  $m/z$ : Calcd for  $\text{C}_{24}\text{H}_{21}\text{O}_2\text{N}_3$   $[\text{M}+\text{H}]^+$  384.1706; Found: 384.1703.

### 3-benzoyl-1-styryl-1,5,6,10*b*-tetrahydro-[1,2,4]triazolo[5,1-*a*]isoquinolin-2(3*H*)-one(3aq)

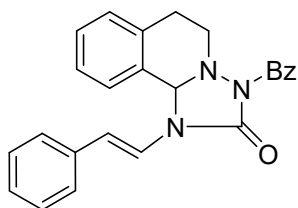

**3aq**

White solid (74 mg, 94%). m.p. 130–135 °C.  $^1\text{H}$  NMR (400 MHz,  $\text{CDCl}_3$ )  $\delta$  7.74–7.69 (m, 2H), 7.58–7.52 (m, 1H), 7.48–7.36 (m, 5H), 7.30 (d,  $J = 7.5$  Hz, 1H), 7.26–7.21 (m, 2H), 7.18–7.13 (m, 3H), 6.94 (d,  $J = 14.8$  Hz, 1H), 6.61 (d,  $J = 14.7$  Hz, 1H), 5.98 (s, 1H), 3.72–3.64 (m, 1H), 3.30 (td,  $J = 10.6, 3.8$  Hz, 1H), 3.15 (ddd,  $J = 15.1, 10.2, 4.7$  Hz, 1H), 2.99 (dt,  $J = 16.6, 4.1$  Hz, 1H).  $^{13}\text{C}$  NMR (100 MHz,  $\text{CDCl}_3$ )  $\delta$  166.3, 150.8, 136.1, 136.1, 133.6, 131.9, 130.0, 130.0, 129.0, 128.8 (2C), 128.6 (2C), 127.8

(2C), 127.1, 127.0, 126.4, 125.5 (2C), 121.1, 118.5, 74.2, 47.8, 27.2. HRMS (ESI-TOF)  $m/z$ : Calcd for  $C_{25}H_{21}O_2N_3$   $[M+H]^+$  396.1706; Found: 396.1708.

### 3-benzoyl-7-methyl-1-phenyl-1,5,6,10b-tetrahydro-[1,2,4]triazolo[5,1-a]isoquinolin-2(3H)-one

(3ba)

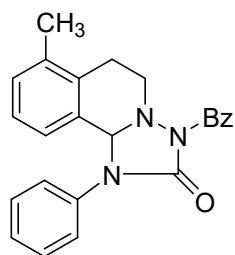

3ba

White solid (51 mg, 66%). m.p. 155-157 °C.  $^1H$  NMR (400 MHz,  $CDCl_3$ )  $\delta$  7.73 (dd,  $J = 5.2, 3.3$  Hz, 2H), 7.52–7.47 (m, 1H), 7.41 (dd,  $J = 10.3, 4.6$  Hz, 2H), 7.33–7.27 (m, 3H), 7.13 (d,  $J = 7.5$  Hz, 1H), 7.01–6.96 (m, 2H), 6.86 (t,  $J = 7.6$  Hz, 1H), 6.31 (d,  $J = 7.7$  Hz, 1H), 5.99 (s, 1H), 3.77 (ddd,  $J = 10.5, 5.1, 3.1$  Hz, 1H), 3.44 (td,  $J = 11.0, 4.0$  Hz, 1H), 3.05 (ddd,  $J = 16.6, 11.4, 5.1$  Hz, 1H), 2.93 (dt,  $J = 17.0, 3.5$  Hz, 1H), 2.29 (s, 3H).  $^{13}C$  NMR (100 MHz,  $CDCl_3$ )  $\delta$  166.4, 152.5, 136.1, 134.7, 133.7, 133.4, 131.6, 130.6, 129.1 (2C), 128.9 (2C), 128.8 (2C), 128.3, 127.8, 127.7 (2C), 127.4, 125.4, 76.1, 47.1, 25.2, 19.2. HRMS (ESI-TOF)  $m/z$ : Calcd for  $C_{24}H_{21}O_2N_3$   $[M+H]^+$  384.1706; Found: 384.1713.

### 3-benzoyl-9-methyl-1-phenyl-1,5,6,10b-tetrahydro-[1,2,4]triazolo[5,1-a]isoquinolin-2(3H)-one

(3ca)

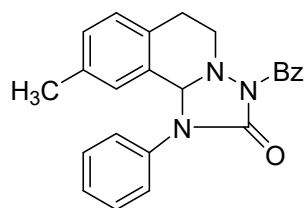

3ca

White solid (95 mg, 82%). m.p. 160-164 °C.  $^1H$  NMR (400 MHz,  $CDCl_3$ )  $\delta$  7.72 (dd,  $J = 5.2, 3.3$  Hz, 2H), 7.52–7.47 (m, 1H), 7.41 (dd,  $J = 10.3, 4.6$  Hz, 2H), 7.34–7.29 (m, 3H), 7.08 (dt,  $J = 7.9, 4.4$  Hz, 2H), 6.98–6.93 (m, 2H), 6.22 (s, 1H), 5.95 (s, 1H), 3.70 (ddd,  $J = 10.5, 4.7, 3.6$  Hz, 1H), 3.43 (td,  $J = 11.0, 3.5$  Hz, 1H), 3.19 (ddd,  $J = 16.3, 11.5, 4.7$  Hz, 1H), 2.94 (dt,  $J = 16.5, 3.4$  Hz, 1H), 2.04 (s, 3H).  $^{13}C$  NMR (100MHz,  $CDCl_3$ )  $\delta$  166.3, 152.4, 135.2, 134.6, 133.8, 131.8, 131.5, 130.4, 130.0, 129.0

(2C), 128.9 (2C), 128.8 (2C), 128.3, 128.1, 127.6 (2C), 127.4, 75.8, 47.8, 27.2, 20.7. HRMS (ESI-TOF)  $m/z$ : Calcd for  $C_{24}H_{21}O_2N_3$   $[M+H]^+$  384.1706; Found: 384.1705.

**3-benzoyl-9-fluoro-1-phenyl-1,5,6,10b-tetrahydro-[1,2,4]triazolo[5,1-a]isoquinolin-2(3H)-one**  
**(3da)**

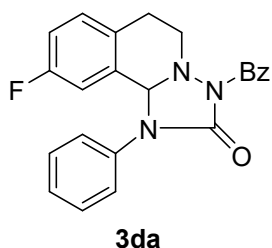

White solid (59 mg, 76%). m.p. 163-165 °C.  $^1H$  NMR (400 MHz,  $CDCl_3$ )  $\delta$  7.75–7.69 (m, 2H), 7.53–7.48 (m, 1H), 7.44–7.39 (m, 2H), 7.38–7.32 (m, 3H), 7.21 (dd,  $J = 8.5, 5.5$  Hz, 1H), 7.03–6.95 (m, 3H), 6.17 (dd,  $J = 9.2, 2.6$  Hz, 1H), 5.97 (s, 1H), 3.73 (ddd,  $J = 10.6, 4.7, 3.7$  Hz, 1H), 3.45 (td,  $J = 11.0, 3.5$  Hz, 1H), 3.20 (ddd,  $J = 16.1, 11.3, 4.7$  Hz, 1H), 2.97 (dt,  $J = 16.5, 3.4$  Hz, 1H).  $^{13}C$  NMR (100 MHz,  $CDCl_3$ )  $\delta$  166.3, 160.3 (d,  $J = 245.5$  Hz), 152.4, 134.3, 133.6, 131.7, 130.7, 130.0, 129.5, 129.4 (2C), 128.8 (2C), 128.7, 128.7 (2C), 127.7 (2C), 116.6 (d,  $J = 21.4$  Hz), 116.3 (d,  $J = 22.9$  Hz), 75.2, 47.6, 27.0.  $^{19}F$  NMR (377 MHz,  $CDCl_3$ )  $\delta$  -115.5. HRMS (ESI-TOF)  $m/z$ : Calcd for  $C_{23}H_{18}O_2N_3F$   $[M+H]^+$  388.1456; Found: 388.1458.

**3-benzoyl-9-chloro-1-phenyl-1,5,6,10b-tetrahydro-[1,2,4]triazolo[5,1-a]isoquinolin-2(3H)-one**  
**(3ea)**

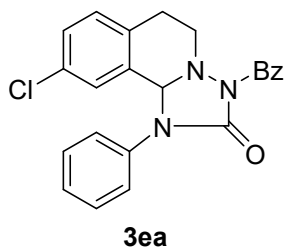

White solid (48 mg, 60%). m.p. 178-180 °C.  $^1H$  NMR (400 MHz,  $CDCl_3$ )  $\delta$  7.72 (dd,  $J = 5.2, 3.3$  Hz, 2H), 7.53–7.47 (m, 1H), 7.41 (dd,  $J = 10.3, 4.6$  Hz, 2H), 7.39–7.33 (m, 3H), 7.26–7.22 (m, 1H), 7.17 (d,  $J = 8.2$  Hz, 1H), 7.01–6.96 (m, 2H), 6.41 (d,  $J = 2.0$  Hz, 1H), 5.94 (s, 1H), 3.73 (ddd,  $J = 10.6, 4.7, 3.6$  Hz, 1H), 3.43 (td,  $J = 11.0, 3.5$  Hz, 1H), 3.20 (ddd,  $J = 16.3, 11.3, 4.8$  Hz, 1H), 2.96 (dt,  $J = 16.7,$

3.4 Hz, 1H).  $^{13}\text{C}$  NMR (100 MHz,  $\text{CDCl}_3$ )  $\delta$  166.3, 152.3, 134.2, 133.5, 133.5, 131.7, 131.4, 129.8, 129.7, 129.5, 129.5, 129.4 (2C), 128.8 (2C), 128.7, 128.7 (2C), 127.7 (2C), 75.1, 47.4, 27.2. HRMS (ESI-TOF)  $m/z$ : Calcd for  $\text{C}_{23}\text{H}_{18}\text{O}_2\text{N}_3\text{Cl}$   $[\text{M}+\text{H}]^+$  404.1160; Found: 404.1164.

**3-benzoyl-9-bromo-1-phenyl-1,5,6,10*b*-tetrahydro-[1,2,4]triazolo[5,1-*a*]isoquinolin-2(3*H*)-one**  
**(3fa)**

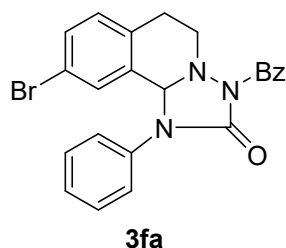

White solid (57 mg, 63%). m.p. 176-178 °C.  $^1\text{H}$  NMR (400 MHz,  $\text{CDCl}_3$ )  $\delta$  7.72 (d,  $J = 7.8$  Hz, 2H), 7.54–7.48 (m, 1H), 7.45–7.34 (m, 6H), 7.11 (d,  $J = 8.2$  Hz, 1H), 6.98 (dd,  $J = 7.1, 1.7$  Hz, 2H), 6.55 (d,  $J = 1.6$  Hz, 1H), 5.93 (s, 1H), 3.73 (dt,  $J = 10.4, 4.1$  Hz, 1H), 3.43 (td,  $J = 11.0, 3.4$  Hz, 1H), 3.18 (ddd,  $J = 16.3, 11.4, 4.8$  Hz, 1H), 2.95 (dt,  $J = 16.7, 3.3$  Hz, 1H).  $^{13}\text{C}$  NMR (100 MHz,  $\text{CDCl}_3$ )  $\delta$  166.3, 152.3, 134.2, 134.0, 133.5, 132.6, 132.3, 131.7, 130.1, 129.9, 129.4 (2C), 128.8 (2C), 128.8, 128.7 (2C), 127.7 (2C), 119.1, 75.0, 47.4, 27.2. HRMS (ESI-TOF)  $m/z$ : Calcd for  $\text{C}_{23}\text{H}_{18}\text{O}_2\text{N}_3\text{Br}$   $[\text{M}+\text{H}]^+$  448.0655; Found: 448.0655.

**1-benzoyl-3-phenyl-3,3*a*,10,11-tetrahydrobenzo[*f*][1,2,4]triazolo[5,1-*a*]isoquinolin-2(1*H*)-one**  
**(3ga)**

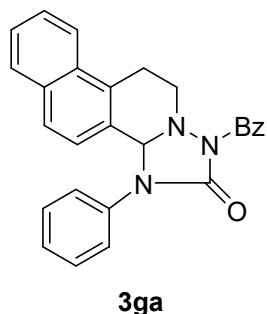

White solid (43 mg, 51%). m.p. 182-183 °C.  $^1\text{H}$  NMR (400 MHz,  $\text{CDCl}_3$ )  $\delta$  8.04 (d,  $J = 8.3$  Hz, 1H), 7.80–7.74 (m, 3H), 7.62–7.48 (m, 3H), 7.45–7.40 (m, 3H), 7.33–7.29 (m, 3H), 7.05–7.00 (m, 2H), 6.49 (d,  $J = 8.6$  Hz, 1H), 6.12 (s, 1H), 3.96 (ddd,  $J = 9.8, 4.7, 2.8$  Hz, 1H), 3.62–3.46 (m, 3H).  $^{13}\text{C}$  NMR (100 MHz,  $\text{CDCl}_3$ )  $\delta$  166.4, 152.4, 134.7, 133.7, 133.3, 131.7, 131.6, 131.0, 129.3 (2C), 129.0

(2C), 128.8 (2C), 128.5, 128.5, 127.7 (2C), 126.9, 126.8, 126.5, 126.2, 124.9, 123.5, 76.0, 46.7, 24.6.  
HRMS (ESI-TOF) *m/z*: Calcd for C<sub>27</sub>H<sub>21</sub>O<sub>2</sub>N<sub>3</sub> [M+H]<sup>+</sup> 420.1706; Found: 420.1711.

**3-benzoyl-7-methyl-1-(thiophen-2-yl)-1,5,6,10*b*-tetrahydro-[1,2,4]triazolo[5,1-*a*]isoquinolin-2(3*H*)-one (3bo)**

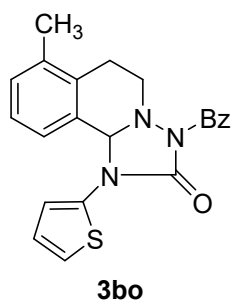

White solid (66 mg, 84%). m.p. 167-169 °C. <sup>1</sup>H NMR (400 MHz, CDCl<sub>3</sub>) δ 7.75–7.71 (m, 2H), 7.54–7.48 (m, 1H), 7.42 (t, *J* = 7.6 Hz, 2H), 7.21–7.15 (m, 2H), 6.95 (t, *J* = 7.6 Hz, 1H), 6.86 (dd, *J* = 5.6, 3.7 Hz, 1H), 6.59 (dd, *J* = 3.7, 1.2 Hz, 1H), 6.50 (d, *J* = 7.7 Hz, 1H), 5.89 (s, 1H), 3.75 (ddd, *J* = 10.4, 5.1, 2.9 Hz, 1H), 3.35 (td, *J* = 11.1, 4.0 Hz, 1H), 3.02 (td, *J* = 11.7, 5.8 Hz, 1H), 2.92 (dt, *J* = 17.0, 3.4 Hz, 1H), 2.29 (s, 3H). <sup>13</sup>C NMR (100 MHz, CDCl<sub>3</sub>) δ 166.2, 152.4, 136.0, 136.0, 133.4, 133.4, 131.8, 130.8, 128.9 (3C), 127.7 (2C), 127.5, 127.1, 126.9, 125.7, 125.6 (2C), 47.3, 25.3, 19.2. HRMS (ESI-TOF) *m/z*: Calcd for C<sub>22</sub>H<sub>19</sub>O<sub>2</sub>N<sub>3</sub>S [M+H]<sup>+</sup> 390.1271; Found: 390.1273.

**3-benzoyl-9-bromo-1-(thiophen-2-yl)-1,5,6,10*b*-tetrahydro-[1,2,4]triazolo[5,1-*a*]isoquinolin-2(3*H*)-one (3fo)**

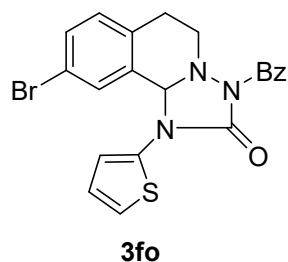

White solid (52 mg, 57%). m.p. 152-153 °C. <sup>1</sup>H NMR (400 MHz, CDCl<sub>3</sub>) δ 7.73–7.70 (m, 2H), 7.52 (t, *J* = 7.4 Hz, 1H), 7.42 (ddd, *J* = 7.3, 4.6, 2.4 Hz, 3H), 7.28–7.25 (m, 2H), 7.12 (d, *J* = 8.2 Hz, 1H), 6.93 (dd, *J* = 5.6, 3.7 Hz, 1H), 6.73 (d, *J* = 1.9 Hz, 1H), 6.61 (dd, *J* = 3.7, 1.2 Hz, 1H), 5.82 (s, 1H), 3.72 (ddd, *J* = 10.3, 4.6, 3.3 Hz, 1H), 3.34 (td, *J* = 11.1, 3.4 Hz, 1H), 3.17 (ddd, *J* = 16.5, 11.7, 4.7 Hz, 1H),



2.92 (dt,  $J = 16.7, 3.1$  Hz, 1H).  $^{13}\text{C}$  NMR (100 MHz,  $\text{CDCl}_3$ )  $\delta$  166.1, 152.2, 135.4, 133.9, 133.2, 132.5, 132.3, 131.9, 130.0, 129.3, 128.9 (2C), 127.8 (2C), 127.4, 126.1, 125.9, 119.3, 75.7, 47.5, 27.3. HRMS (ESI-TOF)  $m/z$ : Calcd for  $\text{C}_{21}\text{H}_{16}\text{O}_2\text{N}_3\text{S}$   $[\text{M}+\text{H}]^+$  454.0219; Found: 454.0221.

**3-benzoyl-9-methyl-1-(naphthalen-1-yl)-1,5,6,10*b*-tetrahydro-[1,2,4]triazolo[5,1-*a*]isoquinolin-2(3*H*)-one (3cm)**

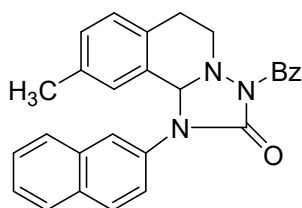

**3cm**

White solid (57 mg, 65%). m.p. 162-163 °C.  $^1\text{H}$  NMR (400 MHz,  $\text{CDCl}_3$ )  $\delta$  7.83–7.79 (m, 1H), 7.78–7.74 (m, 3H), 7.72–7.69 (m, 1H), 7.53–7.40 (m, 6H), 7.13 (d,  $J = 7.8$  Hz, 1H), 7.06 (dd,  $J = 7.8, 1.0$  Hz, 1H), 7.02 (dd,  $J = 8.7, 2.1$  Hz, 1H), 6.25 (s, 1H), 6.05 (s, 1H), 3.73 (ddd,  $J = 10.6, 4.7, 3.8$  Hz, 1H), 3.50 (td,  $J = 11.0, 3.5$  Hz, 1H), 3.21 (ddd,  $J = 16.1, 11.3, 4.7$  Hz, 1H), 2.99 (dt,  $J = 16.5, 3.4$  Hz, 1H), 1.91 (s, 3H).  $^{13}\text{C}$  NMR (100 MHz,  $\text{CDCl}_3$ )  $\delta$  166.4, 152.6, 135.4, 133.8, 133.2, 132.6, 132.0, 131.9, 131.6, 130.6, 130.1, 128.8 (2C), 128.8, 128.2, 127.8, 127.8, 127.7 (2C), 127.6, 127.5, 126.6, 126.4, 126.0, 76.0, 48.0, 27.3, 20.7. HRMS (ESI-TOF)  $m/z$ : Calcd for  $\text{C}_{28}\text{H}_{23}\text{O}_2\text{N}_3$   $[\text{M}+\text{H}]^+$  434.1863; Found: 434.1866.

**3-benzoyl-9-chloro-1-(naphthalen-1-yl)-1,5,6,10*b*-tetrahydro-[1,2,4]triazolo[5,1-*a*]isoquinolin-2(3*H*)-one (3em)**

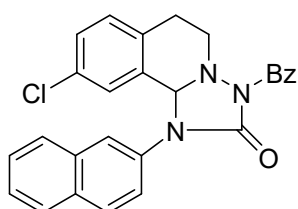

**3em**

White solid (50 mg, 55%). m.p. 160-162 °C.  $^1\text{H}$  NMR (400 MHz,  $\text{CDCl}_3$ )  $\delta$  7.84–7.79 (m, 2H), 7.77–7.72 (m, 3H), 7.54–7.47 (m, 4H), 7.46–7.40 (m, 2H), 7.21 (dt,  $J = 18.1, 5.1$  Hz, 2H), 7.01 (dd,  $J = 8.7, 2.1$  Hz, 1H), 6.47 (d,  $J = 1.9$  Hz, 1H), 6.05 (s, 1H), 3.75 (dt,  $J = 8.6, 4.6$  Hz, 1H), 3.51 (td,  $J = 11.0, 3.5$

Hz, 1H), 3.21 (ddd,  $J = 16.2, 11.1, 4.8$  Hz, 1H), 3.01 (dt,  $J = 16.7, 3.5$  Hz, 1H).  $^{13}\text{C}$  NMR (100 MHz,  $\text{CDCl}_3$ )  $\delta$  166.4, 152.5, 133.6, 133.3, 132.7, 131.8, 131.6, 131.5, 129.8, 129.7, 129.6, 129.5, 129.3, 128.9 (2C), 127.9, 127.7 (3C), 127.7, 127.7, 126.8, 126.7, 125.6, 75.2, 47.6, 27.2. HRMS (ESI-TOF)  $m/z$ : Calcd for  $\text{C}_{27}\text{H}_{20}\text{O}_2\text{N}_3\text{Cl}$   $[\text{M}+\text{H}]^+$  454.1317; Found: 454.1318.

**3-benzoyl-1-(4-fluorophenyl)-9-methyl-1,5,6,10*b*-tetrahydro-[1,2,4]triazolo[5,1-*a*]isoquinolin-2(3*H*)-one (3cg)**

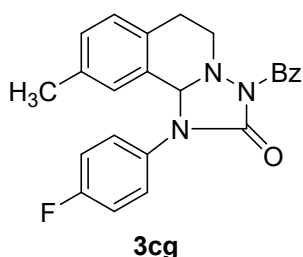

White solid (67 mg, 83%). m.p. 156-158 °C.  $^1\text{H}$  NMR (400 MHz,  $\text{CDCl}_3$ )  $\delta$  7.72 (dd,  $J = 5.2, 3.3$  Hz, 2H), 7.50 (ddd,  $J = 6.6, 3.9, 1.2$  Hz, 1H), 7.41 (dd,  $J = 10.4, 4.6$  Hz, 2H), 7.14–7.07 (m, 2H), 7.03–6.97 (m, 2H), 6.91 (ddd,  $J = 9.6, 4.9, 2.4$  Hz, 2H), 6.22 (s, 1H), 5.90 (s, 1H), 3.70 (ddd,  $J = 10.4, 4.7, 3.5$  Hz, 1H), 3.40 (td,  $J = 11.0, 3.5$  Hz, 1H), 3.19 (ddd,  $J = 16.3, 11.5, 4.7$  Hz, 1H), 2.93 (dt,  $J = 16.5, 3.3$  Hz, 1H), 2.08 (s, 3H).  $^{13}\text{C}$  NMR (100 MHz,  $\text{CDCl}_3$ )  $\delta$  166.3, 162.11 (d,  $J = 248.6$  Hz), 152.5, 135.6, 133.7, 131.8, 131.7, 130.8, 130.7, 130.5, 130.4, 130.2, 128.8 (2C), 128.3, 127.7 (2C), 127.3, 116.1, 115.9, 75.9, 47.8, 27.2, 20.8.  $^{19}\text{F}$  NMR (377 MHz,  $\text{CDCl}_3$ )  $\delta$  -112.5 (s). HRMS (ESI-TOF)  $m/z$ : Calcd for  $\text{C}_{24}\text{H}_{20}\text{O}_2\text{N}_3\text{F}$   $[\text{M}+\text{H}]^+$  402.1612; Found: 402.1616.

**3-benzoyl-1-(3,5-dimethylphenyl)-9-methyl-1,5,6,10*b*-tetrahydro-[1,2,4]triazolo[5,1-*a*]isoquinolin-2(3*H*)-one (3ck)**

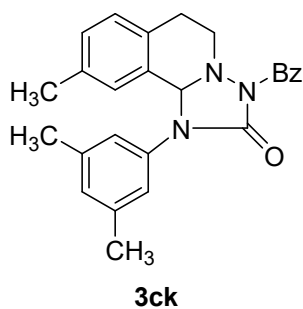

White solid (71 mg, 87%). m.p. 178-180 °C.  $^1\text{H}$  NMR (400 MHz,  $\text{CDCl}_3$ )  $\delta$  7.74–7.70 (m, 2H), 7.52–

7.46 (m, 1H), 7.41 (t,  $J = 7.4$  Hz, 2H), 7.12–7.05 (m, 2H), 6.92 (s, 1H), 6.55 (s, 2H), 6.26 (s, 1H), 5.91 (s, 1H), 3.72–3.66 (m, 1H), 3.41 (td,  $J = 11.0, 3.4$  Hz, 1H), 3.19 (ddd,  $J = 16.2, 11.5, 4.7$  Hz, 1H), 2.93 (dt,  $J = 16.4, 3.3$  Hz, 1H), 2.22 (s, 6H), 2.07 (s, 3H).  $^{13}\text{C}$  NMR (100 MHz,  $\text{CDCl}_3$ )  $\delta$  166.4, 152.5, 138.7 (2C), 135.0, 134.3, 133.9, 131.8, 131.5, 130.6, 129.9, 129.9, 128.8 (2C), 128.1, 127.6 (3C), 126.3 (2C), 75.8, 47.8, 27.3, 21.0 (2C), 20.7. HRMS (ESI-TOF)  $m/z$ : Calcd for  $\text{C}_{26}\text{H}_{25}\text{O}_2\text{N}_3$   $[\text{M}+\text{H}]^+$  412.2019; Found: 412.2016.

**3-benzoyl-9-fluoro-1-(4-(trifluoromethyl)phenyl)-1,5,6,10b-tetrahydro-[1,2,4]triazolo[5,1-a]isoquinolin-2(3H)-one (3dj)**

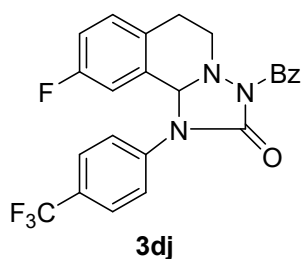

White solid (69 mg, 76%). m.p. 168-169 °C.  $^1\text{H}$  NMR (400 MHz,  $\text{CDCl}_3$ )  $\delta$  7.74–7.71 (m, 2H), 7.61 (d,  $J = 8.4$  Hz, 2H), 7.55–7.50 (m, 1H), 7.43 (dd,  $J = 10.5, 4.6$  Hz, 2H), 7.27–7.21 (m, 1H), 7.14 (d,  $J = 8.3$  Hz, 2H), 7.03 (td,  $J = 8.4, 2.6$  Hz, 1H), 6.27 (dd,  $J = 8.9, 2.6$  Hz, 1H), 6.04 (s, 1H), 3.71 (dt,  $J = 10.9, 4.4$  Hz, 1H), 3.46 (td,  $J = 10.9, 3.7$  Hz, 1H), 3.17 (ddd,  $J = 15.6, 10.7, 4.6$  Hz, 1H), 3.00 (dt,  $J = 16.5, 3.7$  Hz, 1H).  $^{13}\text{C}$  NMR (100 MHz,  $\text{CDCl}_3$ )  $\delta$  166.3 (d,  $J = 246.5$  Hz), 160.4, 152.2, 137.8, 133.3, 132.0, 130.9, 130.4, 129.2, 128.9 (2C), 128.6 (2C), 127.8 (2C), 126.5, 123.5 (d,  $J = 272.3$  Hz), 117.1, 116.9, 116.5, 116.2, 75.3, 47.9, 26.8.  $^{19}\text{F}$  NMR (377 MHz,  $\text{CDCl}_3$ )  $\delta$  -62.7 (s), -114.8 (s). HRMS (ESI-TOF)  $m/z$ : Calcd for  $\text{C}_{24}\text{H}_{17}\text{O}_2\text{N}_3\text{F}_4$   $[\text{M}+\text{H}]^+$  456.1330; Found: 456.1329.

**3-benzoyl-9-chloro-1-(p-tolyl)-1,5,6,10b-tetrahydro-[1,2,4]triazolo[5,1-a]isoquinolin-2(3H)-one (3ee)**

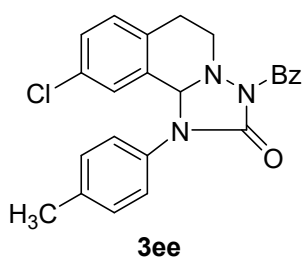

White solid (50 mg, 61%). m.p. 178-180 °C. <sup>1</sup>H NMR (400 MHz, CDCl<sub>3</sub>) δ 7.73–7.69 (m, 2H), 7.50 (ddd, *J* = 6.6, 3.8, 1.2 Hz, 1H), 7.41 (t, *J* = 7.5 Hz, 2H), 7.26–7.22 (m, 1H), 7.16 (dd, *J* = 8.2, 3.7 Hz, 3H), 6.85 (d, *J* = 8.2 Hz, 2H), 6.44 (d, *J* = 2.0 Hz, 1H), 5.91 (s, 1H), 3.71 (ddd, *J* = 10.6, 4.6, 3.7 Hz, 1H), 3.42 (td, *J* = 11.0, 3.4 Hz, 1H), 3.19 (ddd, *J* = 16.3, 11.3, 4.8 Hz, 1H), 2.95 (dt, *J* = 16.7, 3.4 Hz, 1H), 2.34 (s, 3H). <sup>13</sup>C NMR (100 MHz, CDCl<sub>3</sub>) δ 166.3, 152.4, 138.8, 133.6, 133.5, 131.7, 131.5, 131.4, 130.0 (2C), 129.8, 129.7, 129.6, 129.4, 128.8 (2C), 128.4 (2C), 127.7 (2C), 75.0, 47.4, 27.2, 21.1. HRMS (ESI-TOF) *m/z*: Calcd for C<sub>24</sub>H<sub>20</sub>O<sub>2</sub>N<sub>3</sub>Cl [M+H]<sup>+</sup> 420.1706; Found: 420.1711.

**3-benzoyl-9-bromo-1-(*p*-tolyl)-1,5,6,10*b*-tetrahydro-[1,2,4]triazolo[5,1-*a*]isoquinolin-2(3*H*)-one (3fe)**

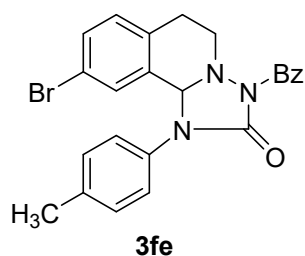

White solid (54 mg, 58%). m.p. 176-177 °C. <sup>1</sup>H NMR (400 MHz, CDCl<sub>3</sub>) δ 7.73–7.69 (m, 2H), 7.50 (ddd, *J* = 6.7, 3.9, 1.2 Hz, 1H), 7.44–7.37 (m, 3H), 7.16 (d, *J* = 8.1 Hz, 2H), 7.10 (d, *J* = 8.2 Hz, 1H), 6.85 (d, *J* = 8.3 Hz, 2H), 6.57 (d, *J* = 1.9 Hz, 1H), 5.90 (s, 1H), 3.71 (ddd, *J* = 10.6, 4.7, 3.7 Hz, 1H), 3.41 (td, *J* = 11.0, 3.4 Hz, 1H), 3.17 (ddd, *J* = 16.3, 11.4, 4.7 Hz, 1H), 2.93 (dt, *J* = 16.7, 3.4 Hz, 1H), 2.34 (s, 3H). <sup>13</sup>C NMR (100 MHz, CDCl<sub>3</sub>) δ 166.3, 152.4, 138.8, 134.0, 133.6, 132.7, 132.3, 131.7, 131.5, 130.0, 130.0 (2C), 130.0, 128.8 (2C), 128.4 (2C), 127.7 (2C), 119.1, 74.9, 47.3, 27.3, 21.1. HRMS (ESI-TOF) *m/z*: Calcd for C<sub>24</sub>H<sub>20</sub>O<sub>2</sub>N<sub>3</sub>Br [M+H]<sup>+</sup> 462.0812; Found: 462.0814.

**3-benzoyl-9-bromo-1-(4-methoxyphenyl)-1,5,6,10*b*-tetrahydro-[1,2,4]triazolo[5,1-*a*]isoquinolin-2(3*H*)-one (3ff)**

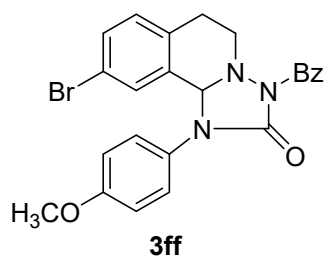

White solid (45 mg, 47%). m.p. 160-162 °C. <sup>1</sup>H NMR (400 MHz, CDCl<sub>3</sub>) δ 7.71 (dd, *J* = 5.2, 3.3 Hz, 2H), 7.53–7.48 (m, 1H), 7.44–7.37 (m, 3H), 7.11 (d, *J* = 8.2 Hz, 1H), 6.87 (s, 4H), 6.56 (d, *J* = 1.9 Hz, 1H), 5.86 (s, 1H), 3.79 (s, 3H), 3.71 (ddd, *J* = 8.1, 4.4, 3.1 Hz, 1H), 3.39 (td, *J* = 11.1, 3.4 Hz, 1H), 3.18 (ddd, *J* = 16.4, 11.5, 4.8 Hz, 1H), 2.93 (dt, *J* = 16.7, 3.3 Hz, 1H). <sup>13</sup>C NMR (100 MHz, CDCl<sub>3</sub>) δ 166.3, 159.6, 152.5, 134.0, 133.7, 132.7, 132.3, 131.7, 130.0, 130.0 (2C), 129.9, 128.8 (2C), 127.7 (2C), 126.7, 119.1, 114.7 (2C), 75.0, 55.5, 47.3, 27.3. HRMS (ESI-TOF) *m/z*: Calcd for C<sub>24</sub>H<sub>20</sub>O<sub>3</sub>N<sub>3</sub>Br [M+H]<sup>+</sup> 478.0760; Found: 478.0765.

#### 4. Scale-up experiment

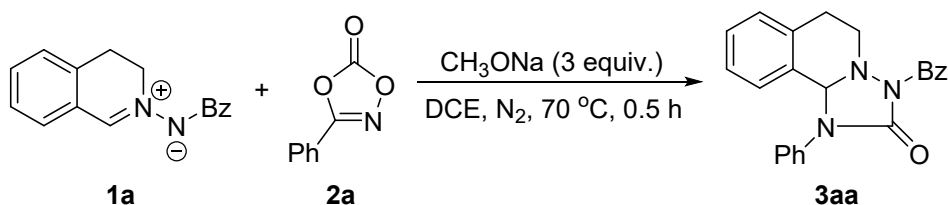

The scale-up reaction of *C,N*-cycloazomethylimine **1a** and dioxazolone **2a** was performed. Reaction of 4.0 mmol of **1a** and 12.0 mmol of **2a** proceeded well under the standard reaction conditions, affording the desired product **3aa** in 82% yield (1.21 g).

#### 5. References

- [1] Y. Wang, L. Zhu, M. Wang, J. Xiong, N. Chen, X. Feng, Z. Xu, and X. Jiang, *Org. Lett.*, 2018, **20**, 6506-6510.
- [2] D. Wang, X. Liu, M. J. Ajitha, Z. Liu, Y. Hu, and K.-W. Huang, *Org. Lett.*, 2023, **25**, 3249-3253.
- [3] Y. Park, K. T. Park, J. G. Kim, and S. Chang, *J. Am. Chem. Soc.*, 2015, **137**, 4534-4542.
- [4] Q. Wang, F. Wang, X. Yang, X. Zhou, and X. Li, *Org. Lett.*, 2016, **18**, 6144-6147.

## 6. X-ray crystallographic data of 3cg

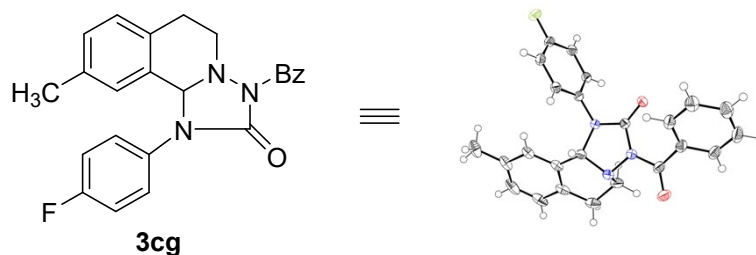

|                                           |                                                                |
|-------------------------------------------|----------------------------------------------------------------|
| CCDC number                               | 2308902                                                        |
| Empirical formula                         | C <sub>24</sub> H <sub>20</sub> FN <sub>3</sub> O <sub>2</sub> |
| Formula weight                            | 401.43                                                         |
| Temperature/K                             | 100                                                            |
| Crystal system                            | Monoclinic                                                     |
| Space group                               | P <sub>1</sub> 2 <sub>1</sub> /n <sub>1</sub>                  |
| Hall group                                | -P 2yn                                                         |
| a/Å                                       | 9.5606 (2)                                                     |
| b/Å                                       | 22.0542 (2)                                                    |
| c/Å                                       | 9.7194 (2)                                                     |
| α/Å                                       | 90                                                             |
| β/°                                       | 108.419 (2)                                                    |
| γ/Å                                       | 90                                                             |
| Volume/Å <sup>3</sup>                     | 1944.36 (7)                                                    |
| Z                                         | 4                                                              |
| ρ <sub>calc</sub> /g/cm <sup>3</sup>      | 1.371                                                          |
| μ/mm <sup>-1</sup>                        | 0.781                                                          |
| F(000)                                    | 840.0                                                          |
| Crystal size/mm <sup>3</sup>              | 0.25 × 0.2 × 0.15                                              |
| Radiation type                            | Cu Kα (λ = 1.54184)                                            |
| 2θ range for data collection/°            | 3.9760 to 75.7380                                              |
| Index ranges                              | -11 ≤ h ≤ 11, -27 ≤ k ≤ 21, -12 ≤ l ≤ 12                       |
| Reflections collected                     | 8871                                                           |
| Independent reflections                   | 3860 [R <sub>int</sub> = 0.0403, R <sub>sigma</sub> = 0.629]   |
| Data/restraints/parameters                | 3860/0/273                                                     |
| Goodness-of-fit on F <sup>2</sup>         | 1.061                                                          |
| Final R indexes [I > 2σ (I)]              | R1 = 0.0403, wR2 = 0.1077                                      |
| Final R indexes [all data]                | R1 = 0.0455, wR2 = 0.1118                                      |
| Largest diff. peak/hole e Å <sup>-3</sup> | 0.23/-0.24                                                     |

## 7. NMR spectra of products

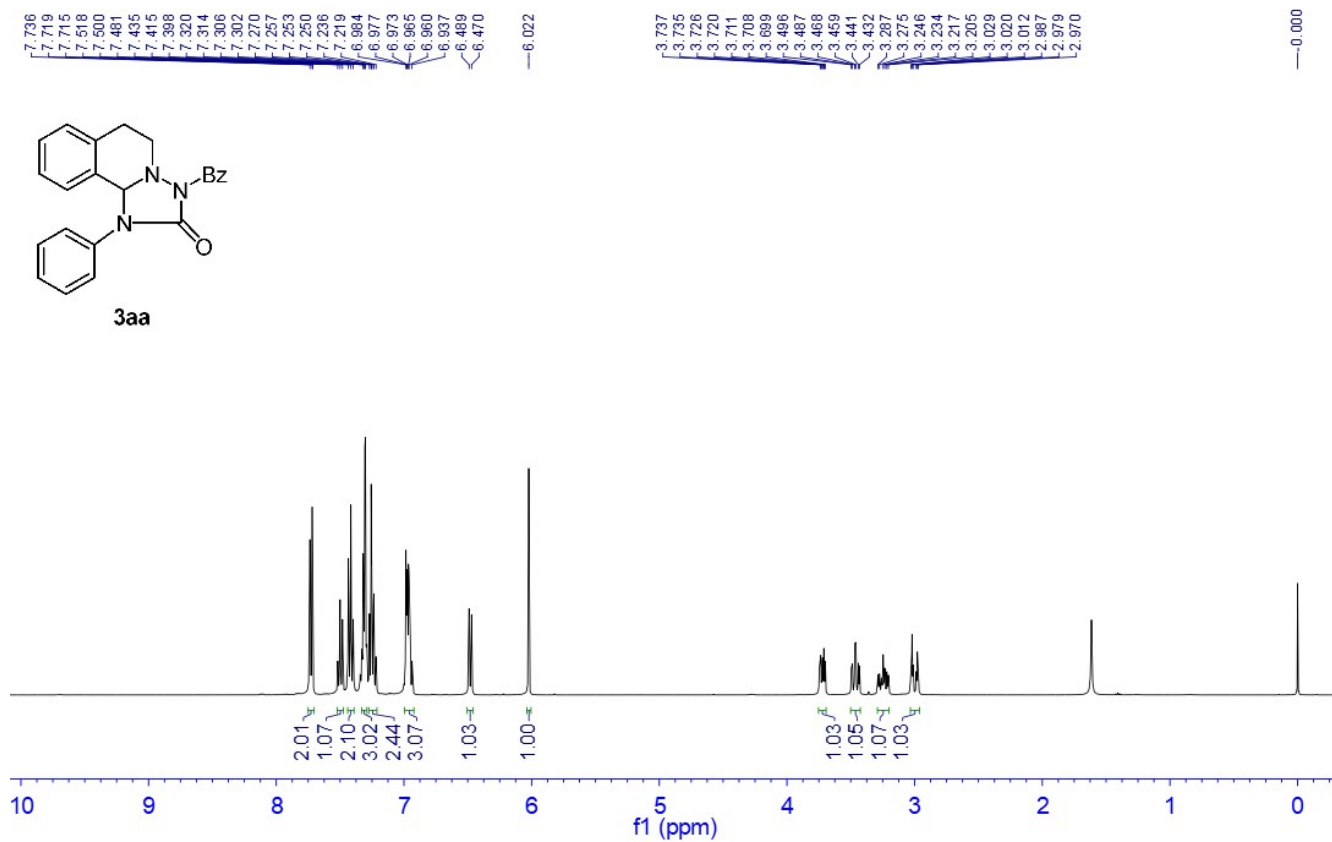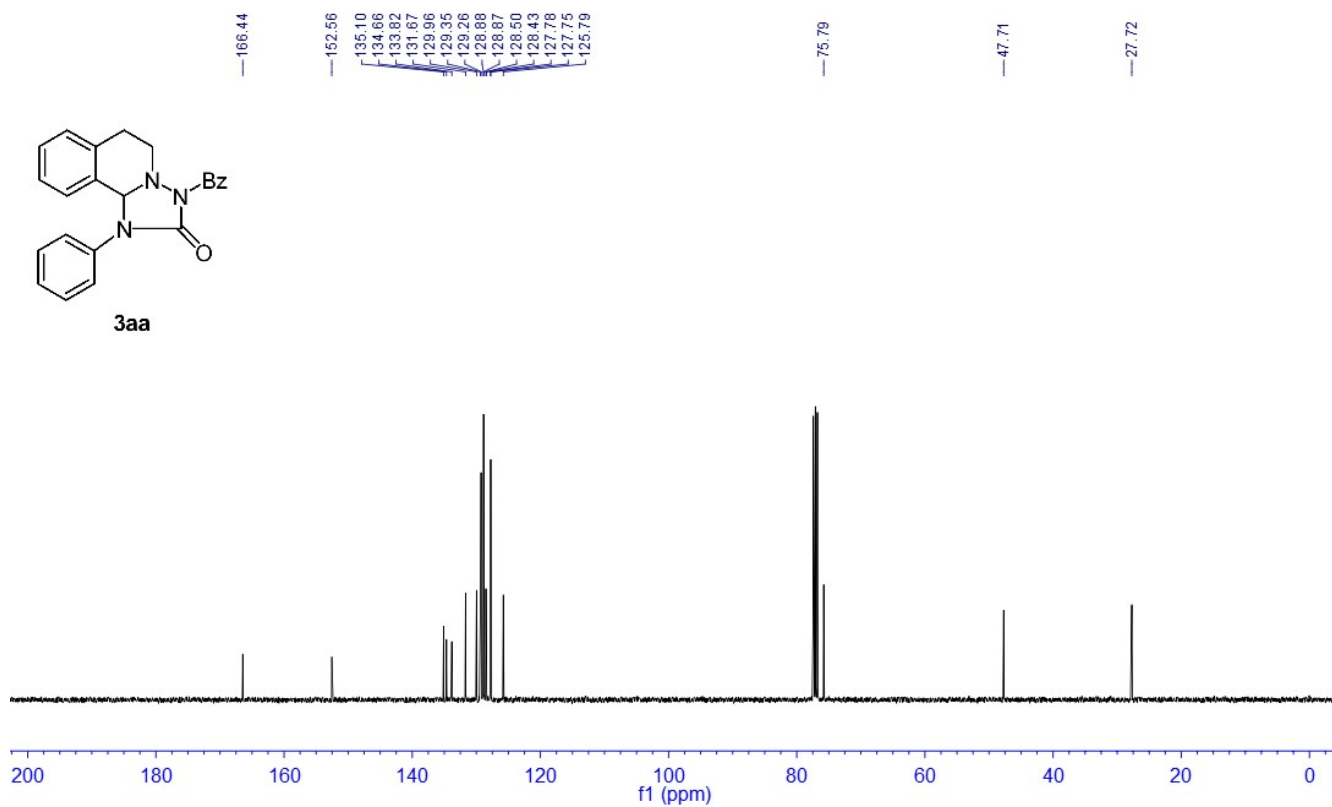

7.737  
7.724  
7.719  
7.715  
7.483  
7.468  
7.465  
7.462  
7.420  
7.404  
7.401  
7.383  
7.337  
7.316  
7.314  
7.298  
7.293  
7.266  
7.220  
7.217  
7.203  
7.201  
6.984  
6.964  
6.908  
6.824  
6.805  
6.399  
6.379  
6.102

3.876  
3.798  
3.793  
3.786  
3.780  
3.773  
3.768  
3.761  
3.514  
3.506  
3.483  
3.458  
3.451  
3.332  
3.320  
3.302  
3.290  
3.278  
3.260  
3.248  
2.974  
2.967  
2.960  
2.933  
2.926  
2.918

0.000

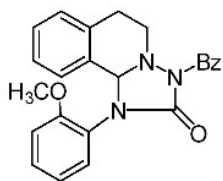

3ab

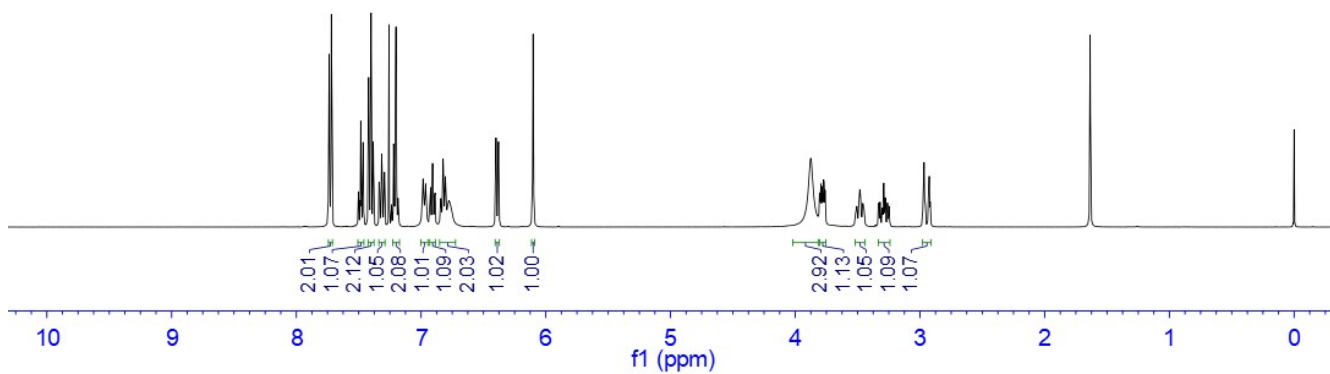

166.3  
156.2  
152.8  
134.8  
133.7  
131.9  
131.5  
130.3  
129.0  
128.9  
128.8  
128.3  
128.0  
127.6  
125.6  
123.1  
120.9  
111.7

77.0  
73.8

56.7

47.1

27.9

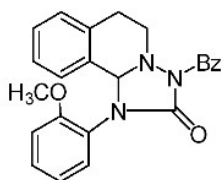

3ab

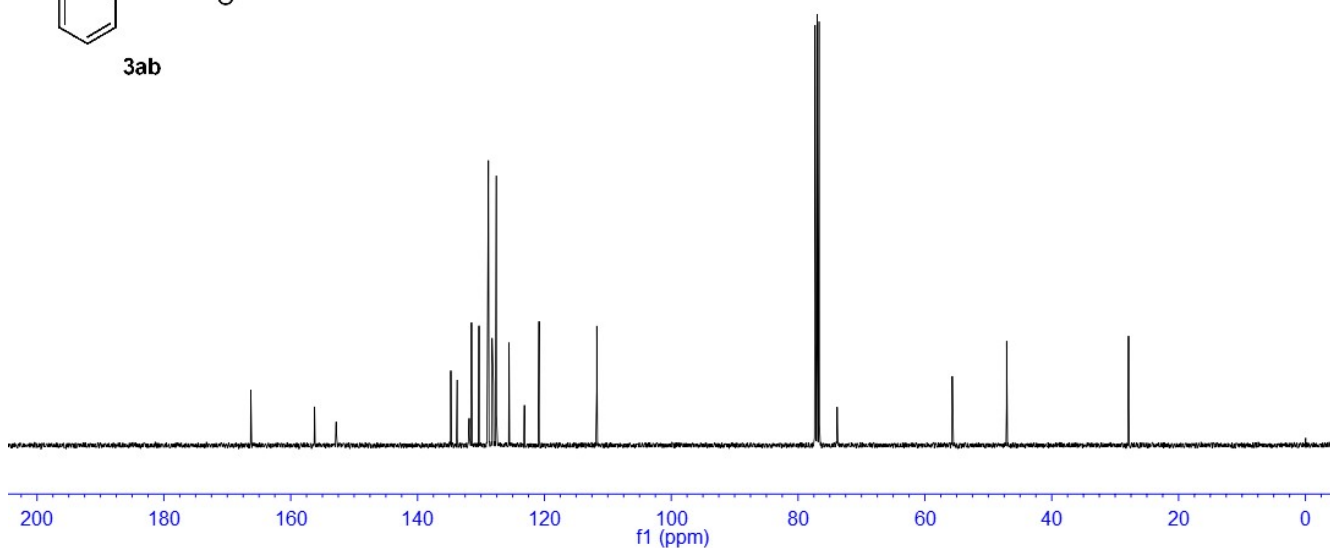



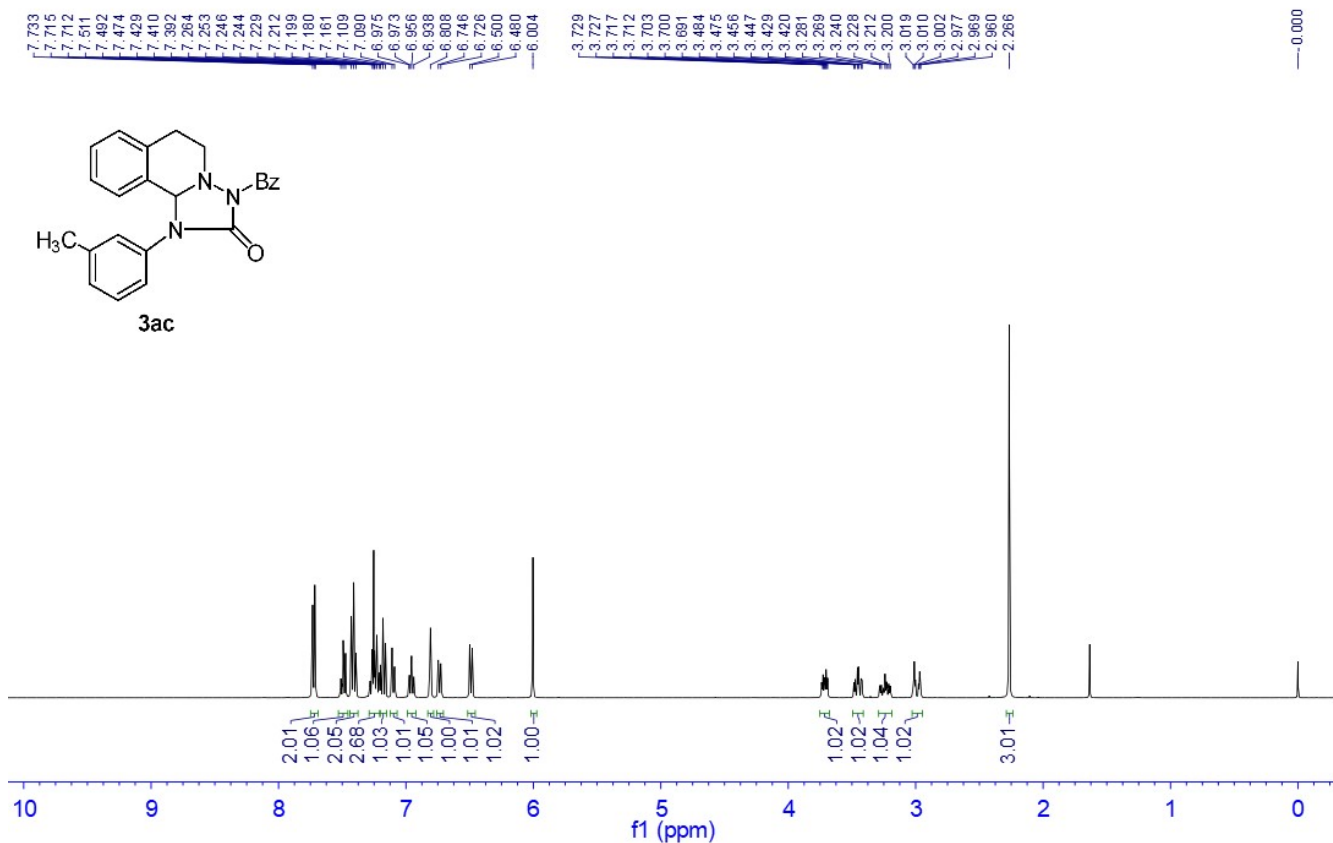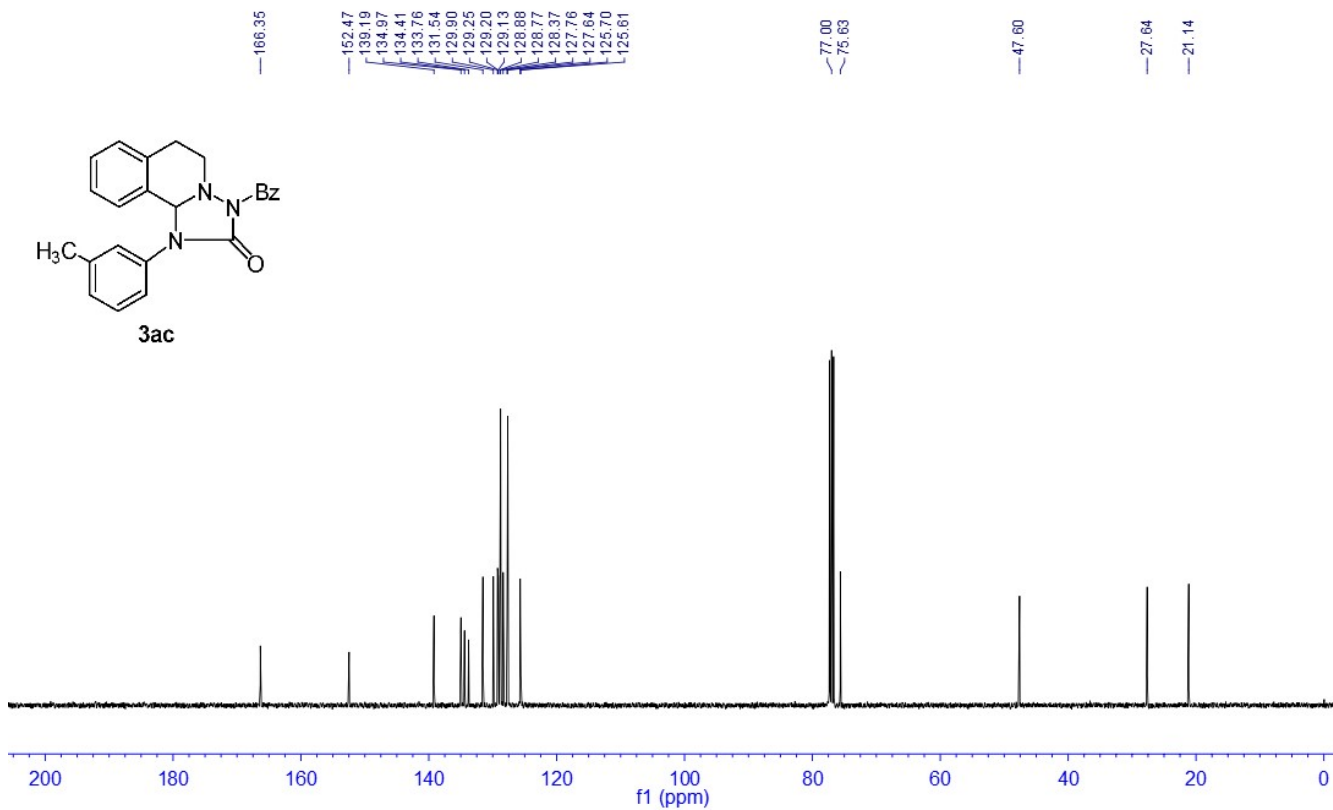

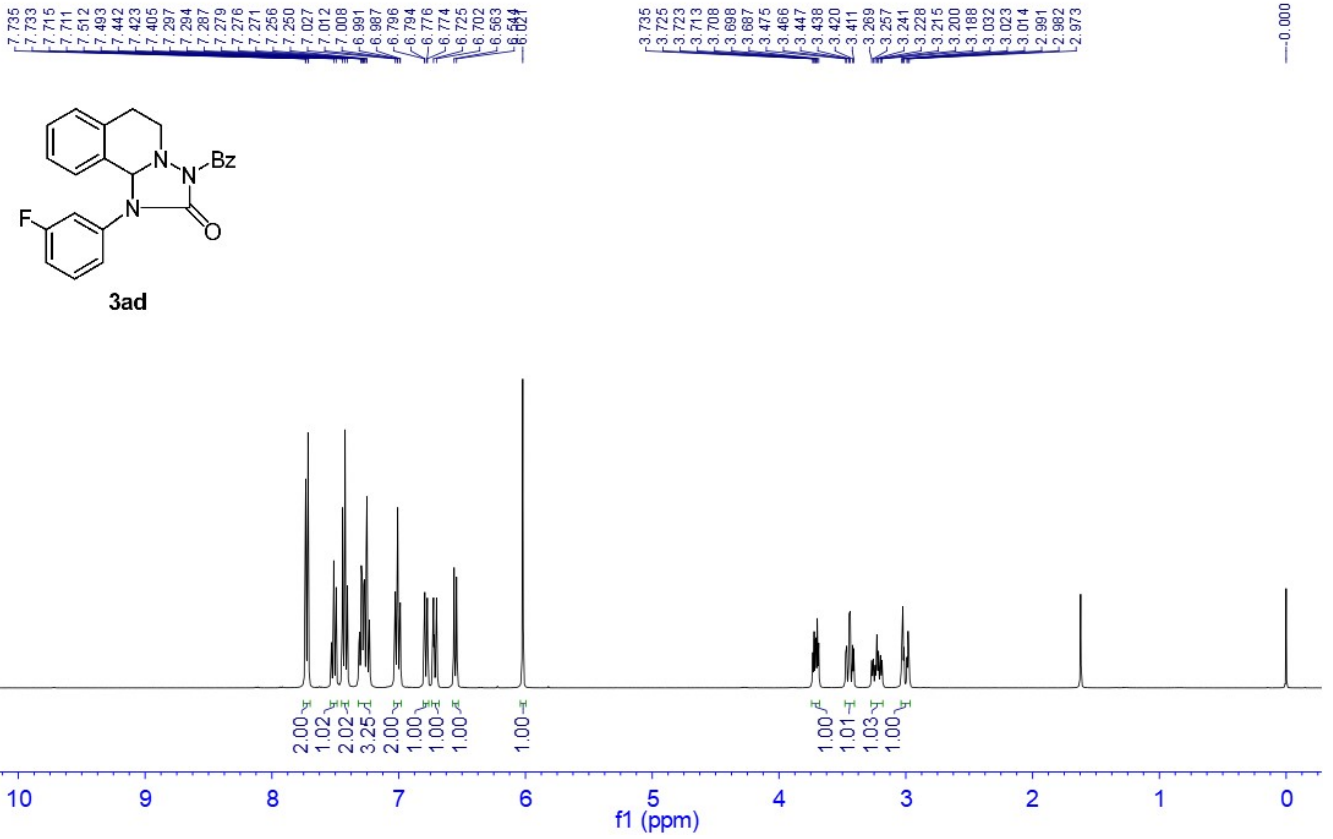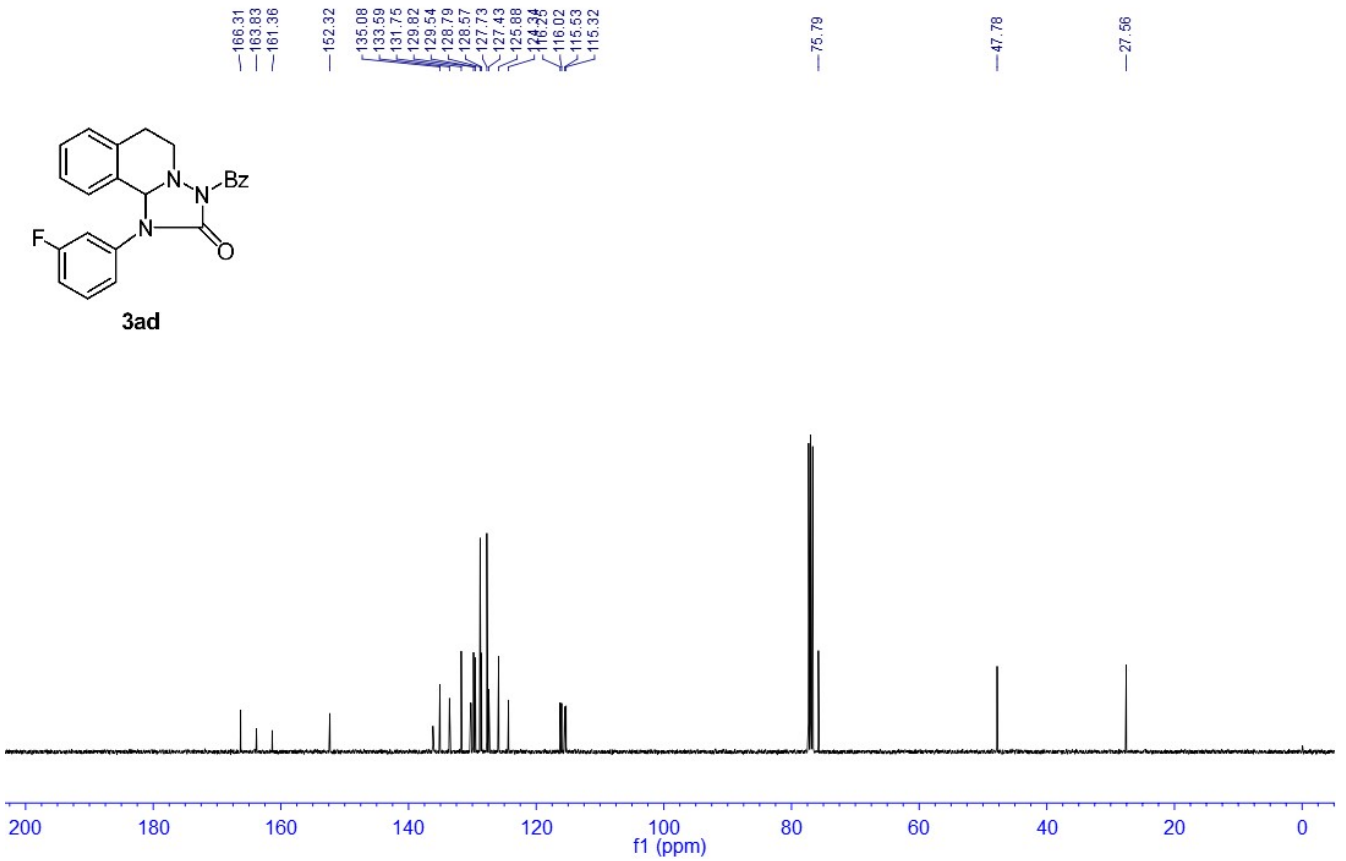

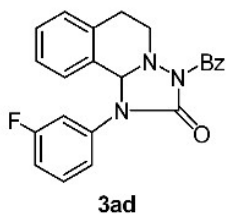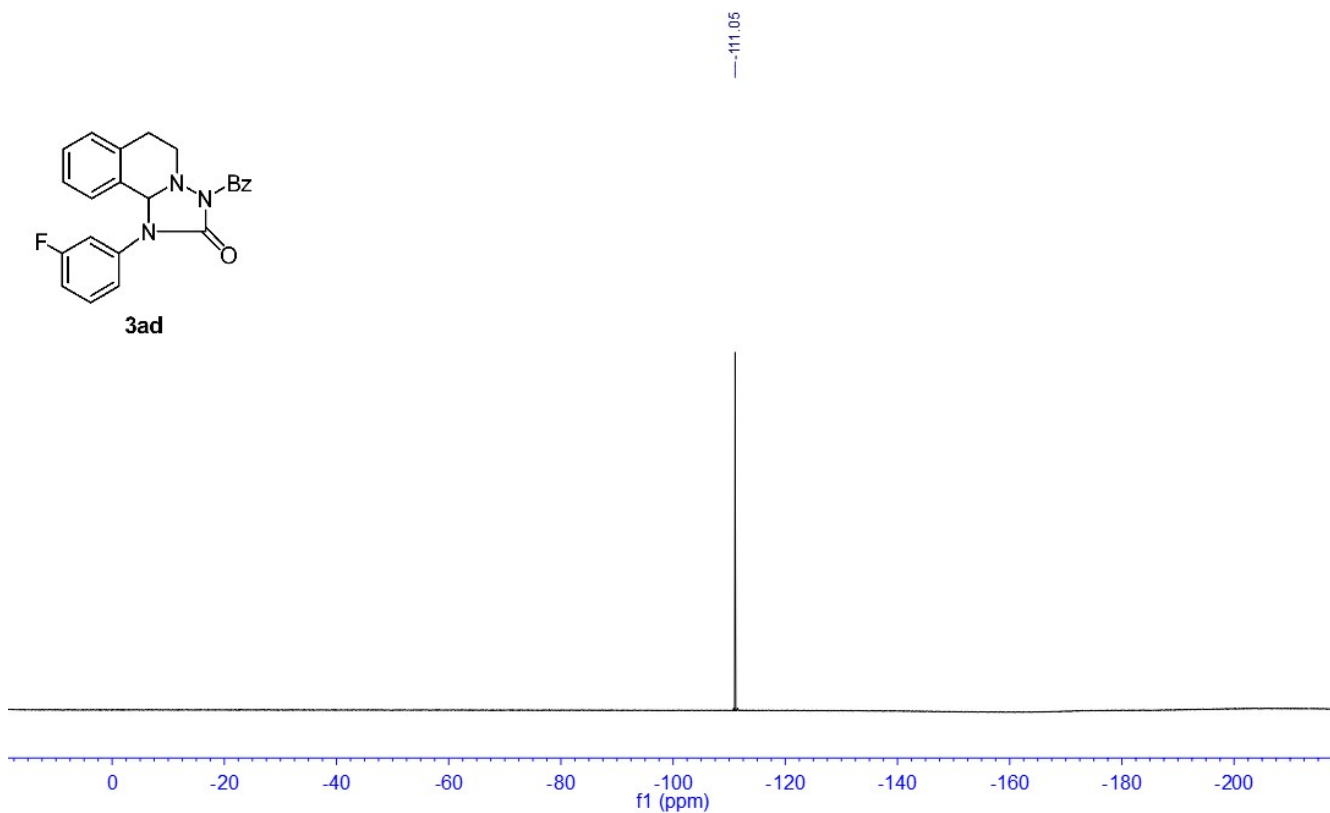

7.730  
7.712  
7.708  
7.495  
7.476  
7.429  
7.413  
7.409  
7.391  
7.270  
7.268  
7.258  
7.252  
7.249  
7.232  
7.214  
7.119  
7.099  
6.988  
6.986  
6.969  
6.951  
6.856  
6.852  
6.840  
6.818  
6.818  
6.489  
-5.985  
3.737  
3.728  
3.725  
3.716  
3.711  
3.702  
3.699  
3.690  
3.478  
3.469  
3.450  
3.441  
3.423  
3.414  
3.287  
3.275  
3.246  
3.233  
3.217  
3.016  
3.008  
2.999  
2.975  
2.966  
2.958  
-0.000

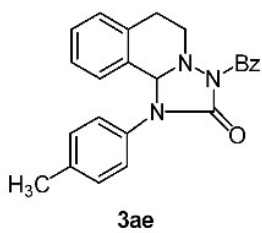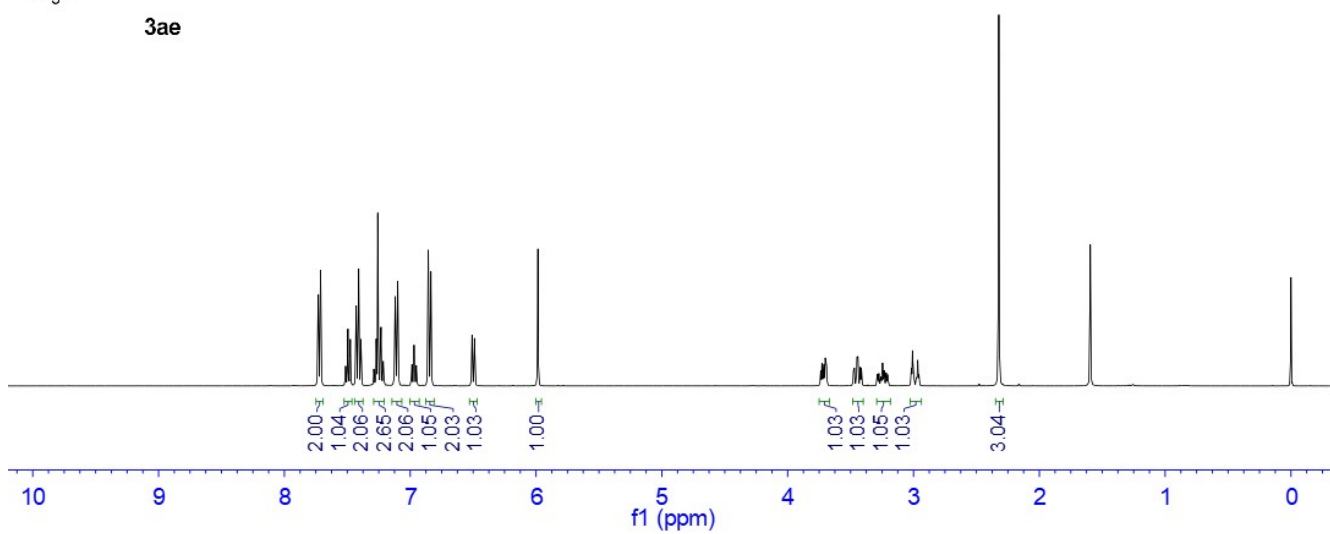

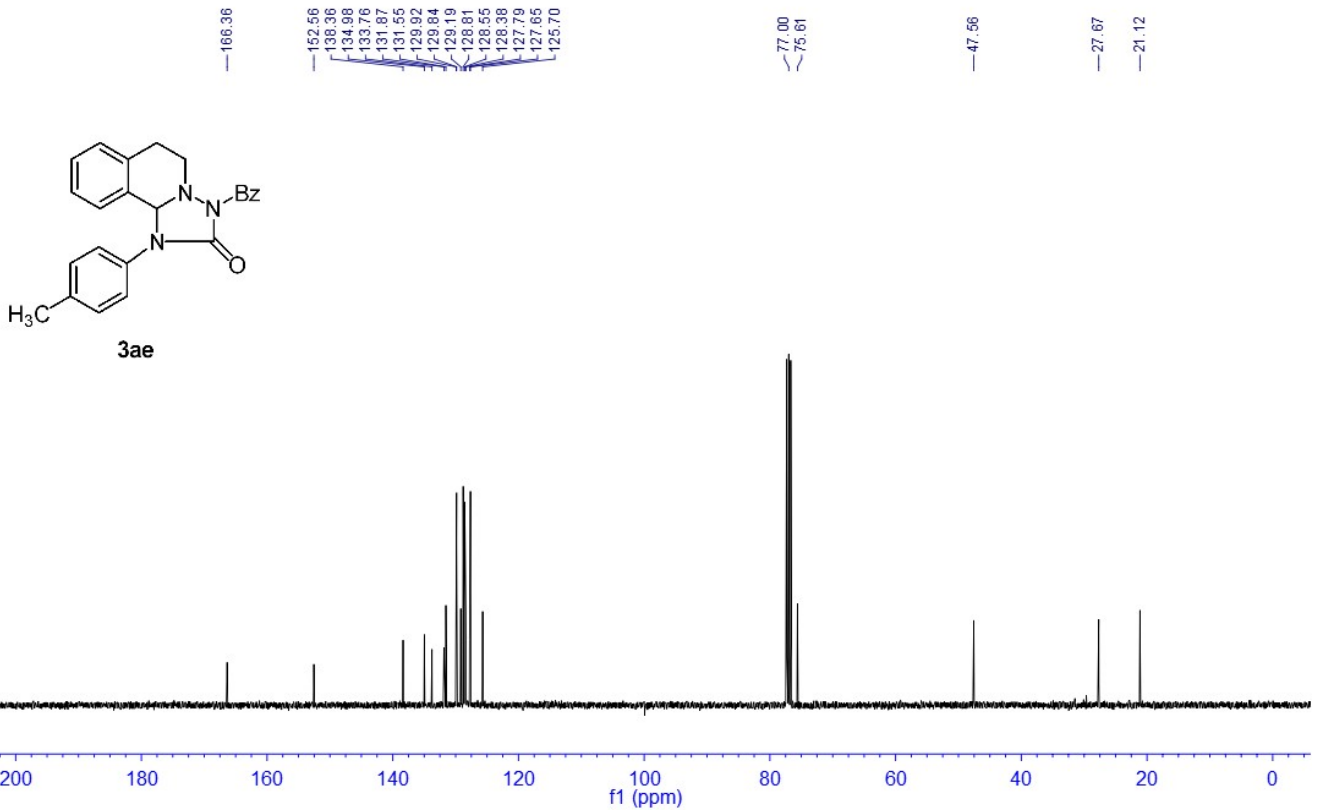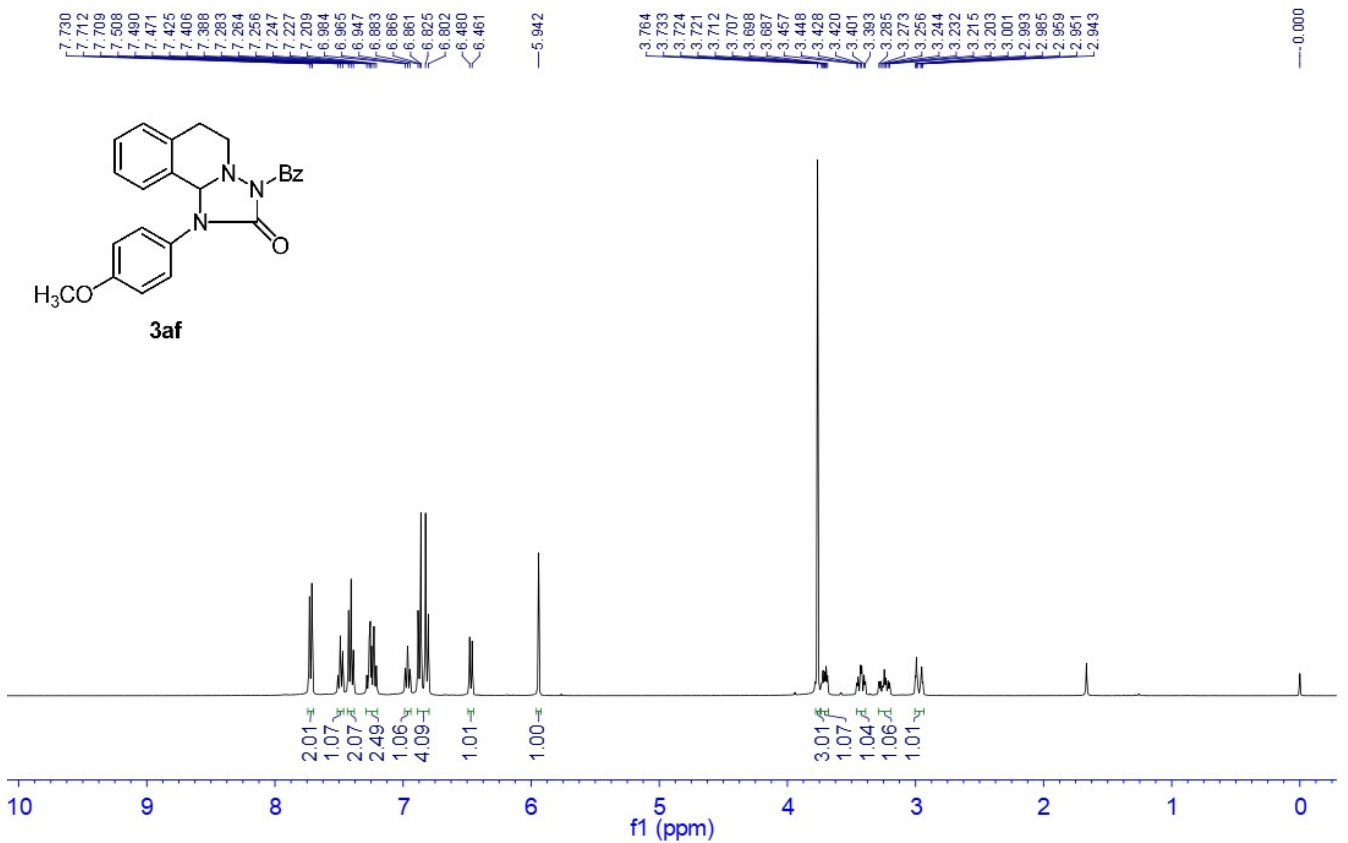

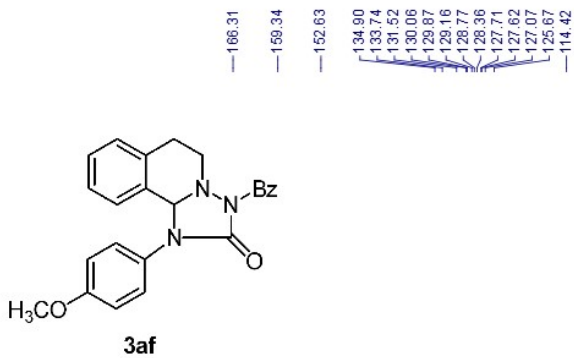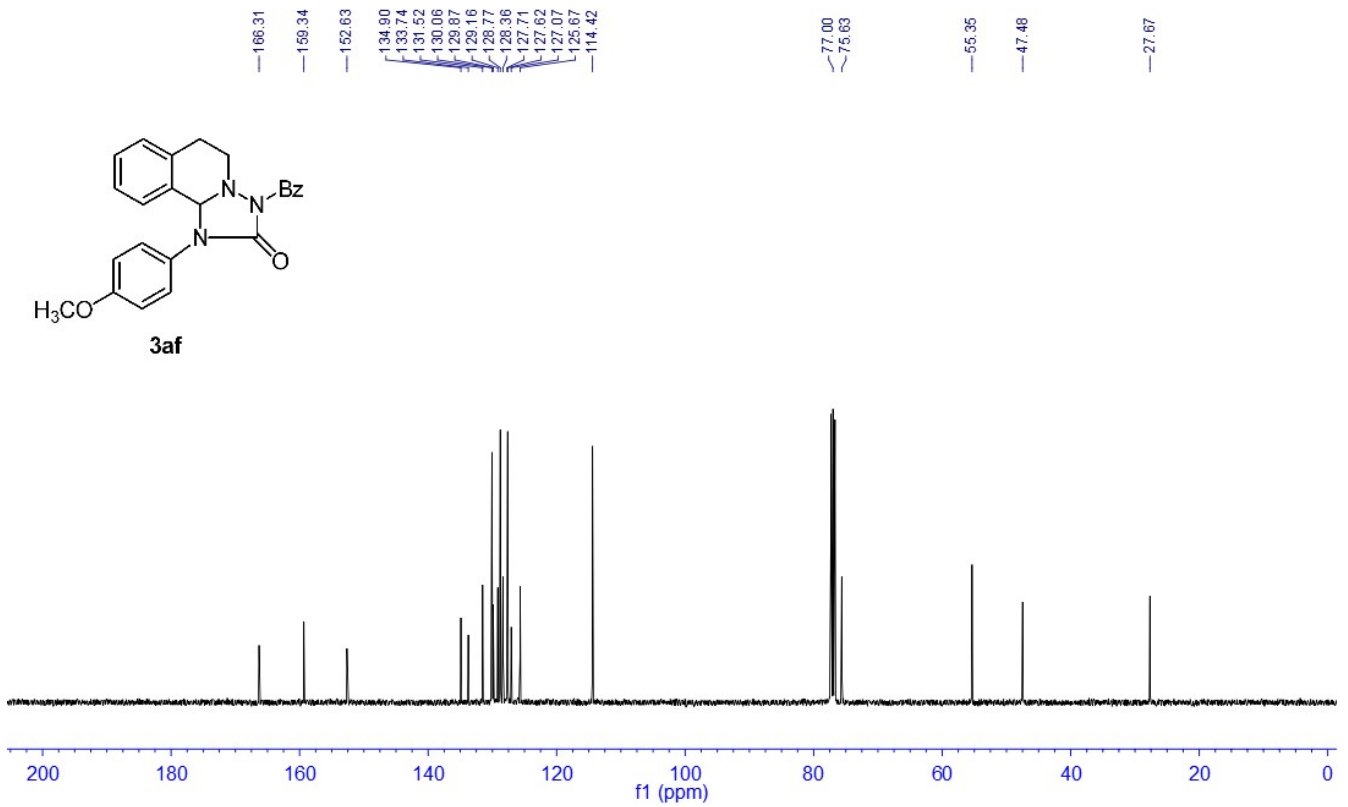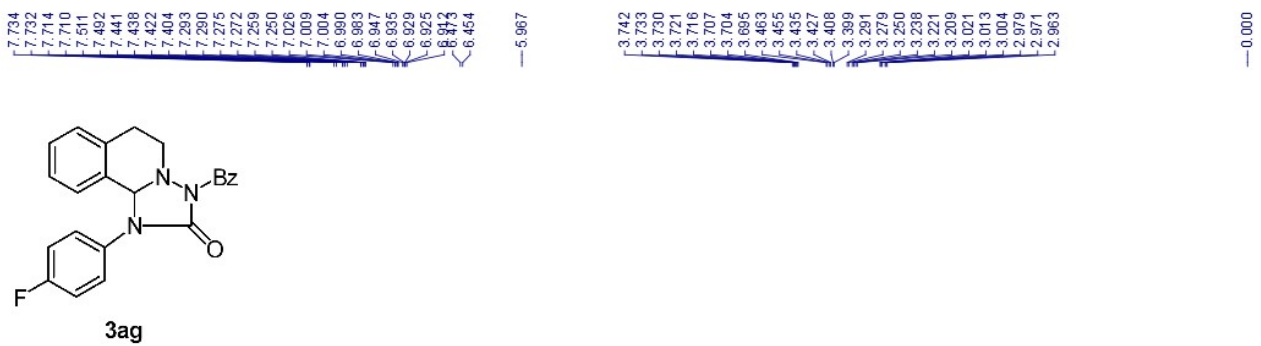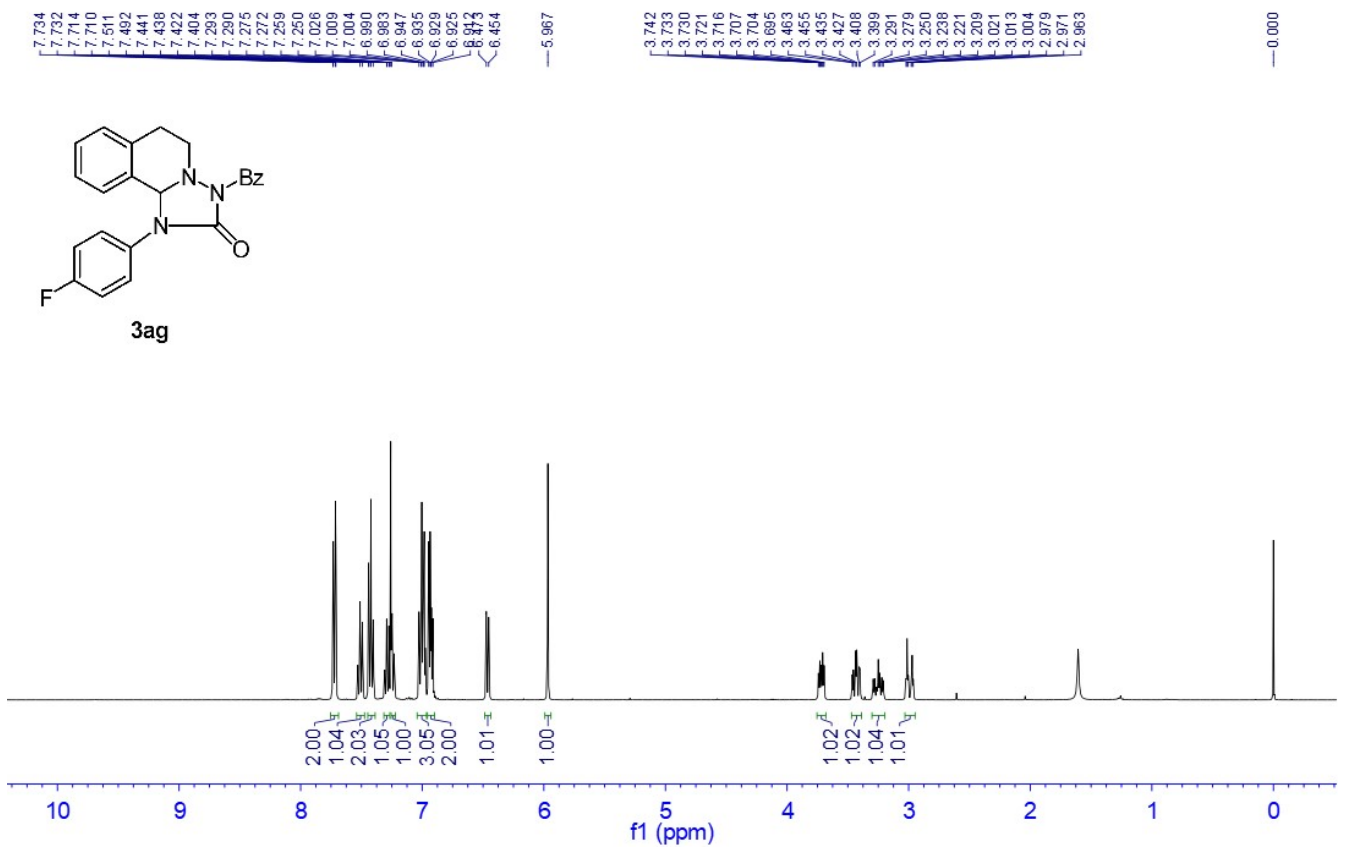

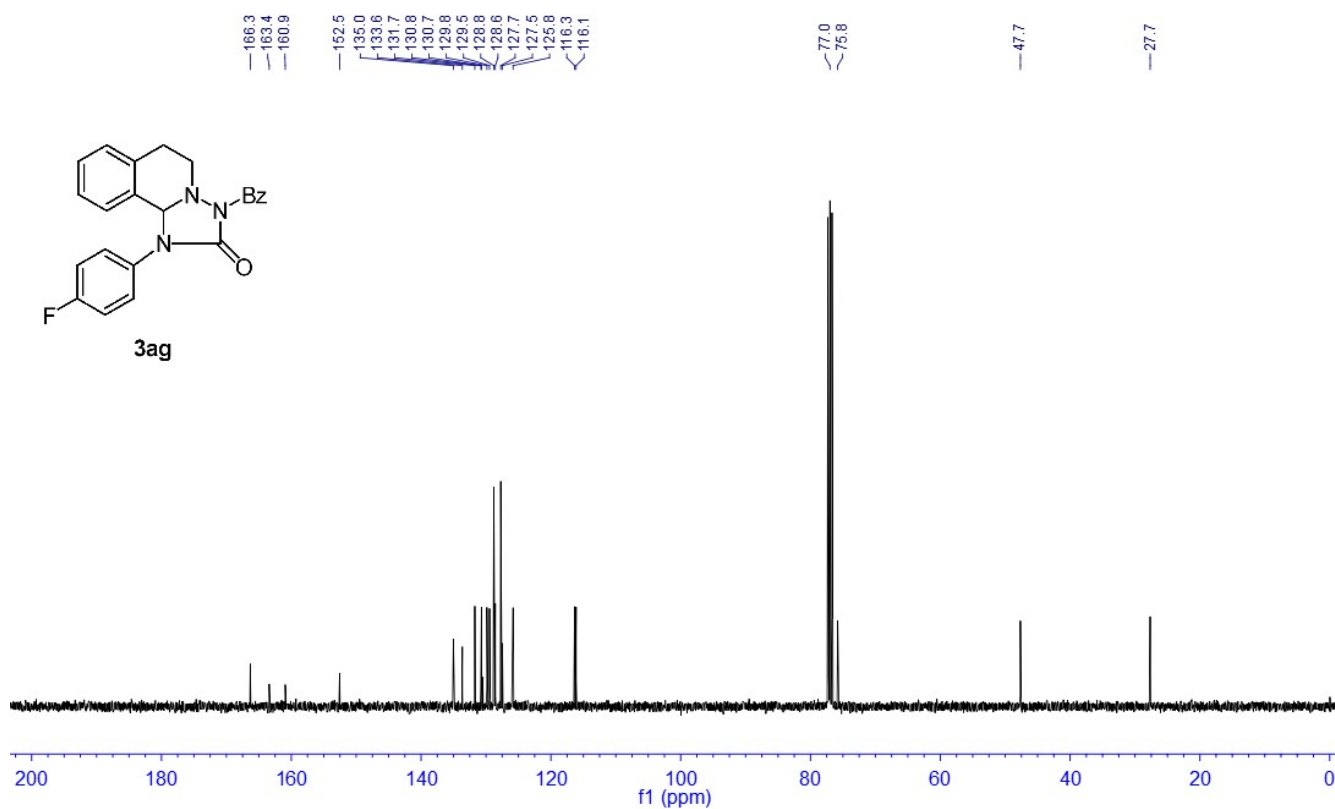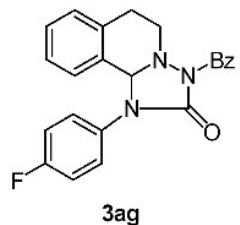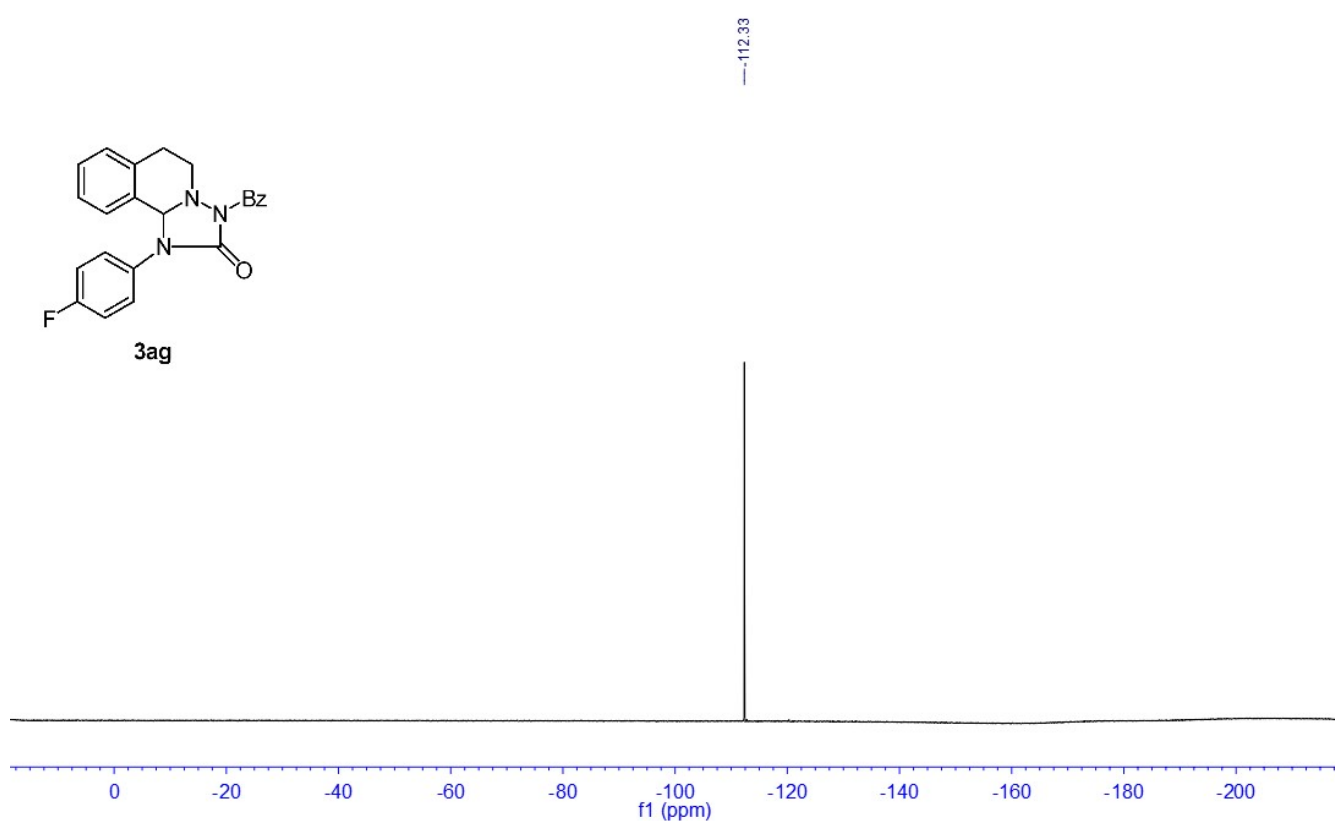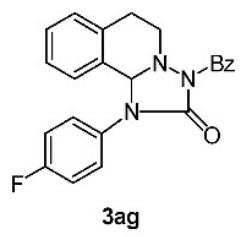

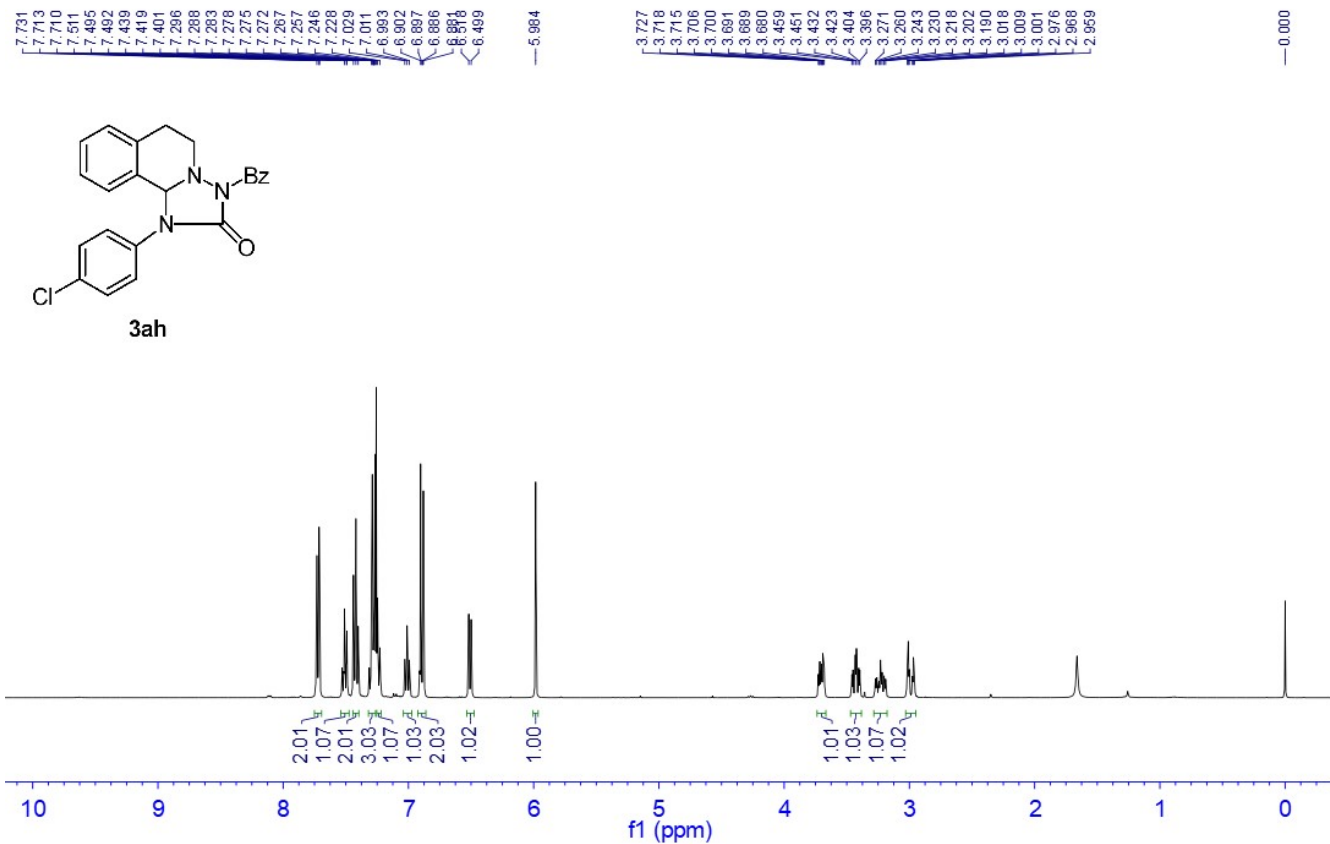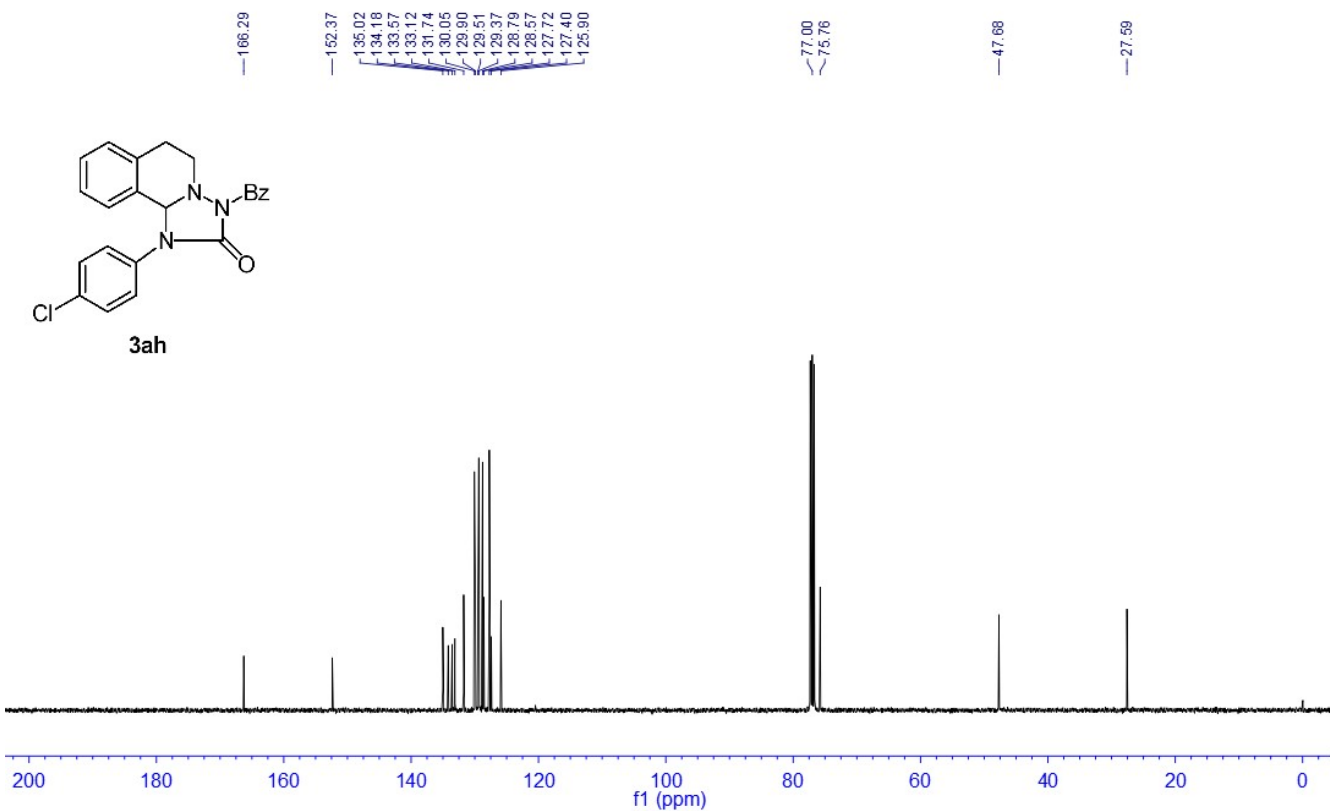

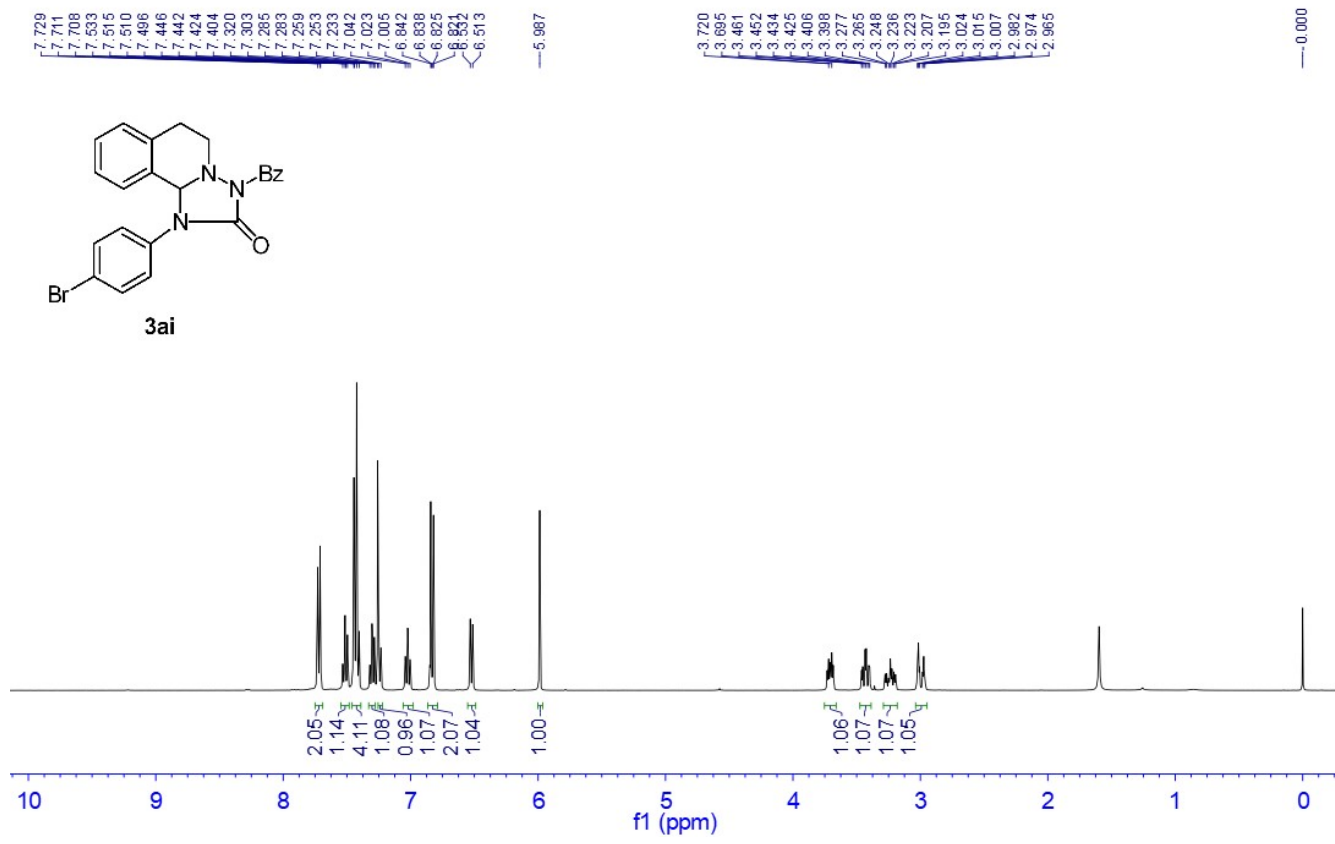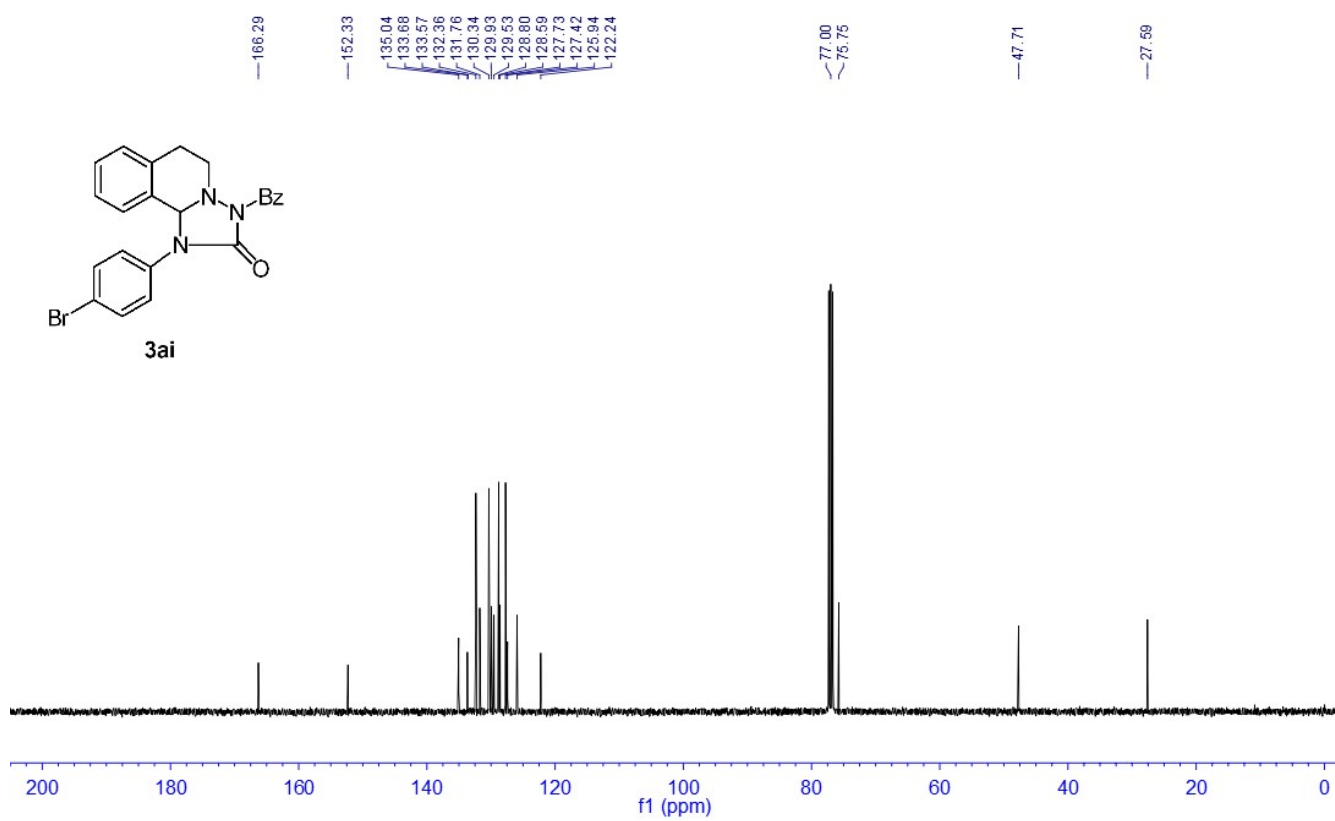



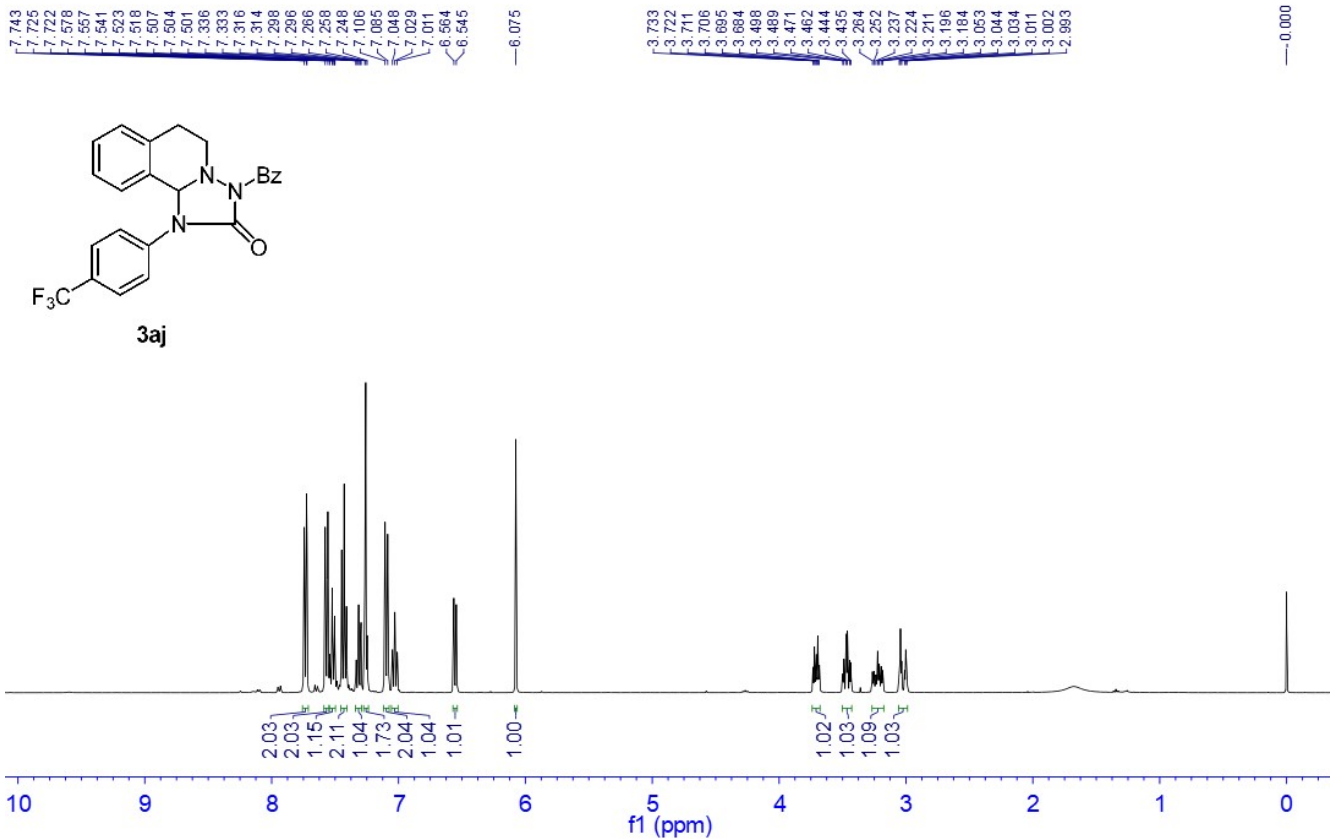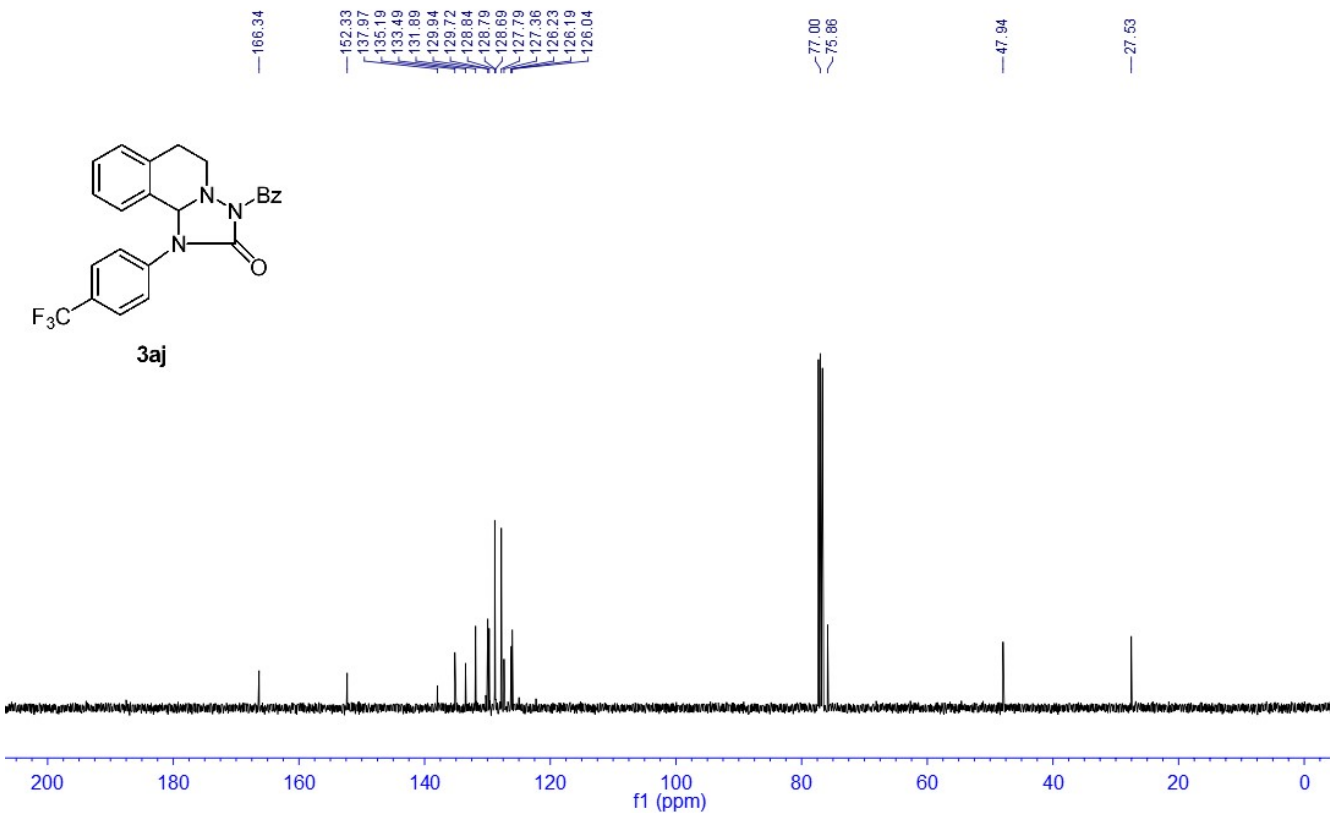

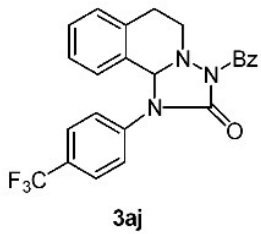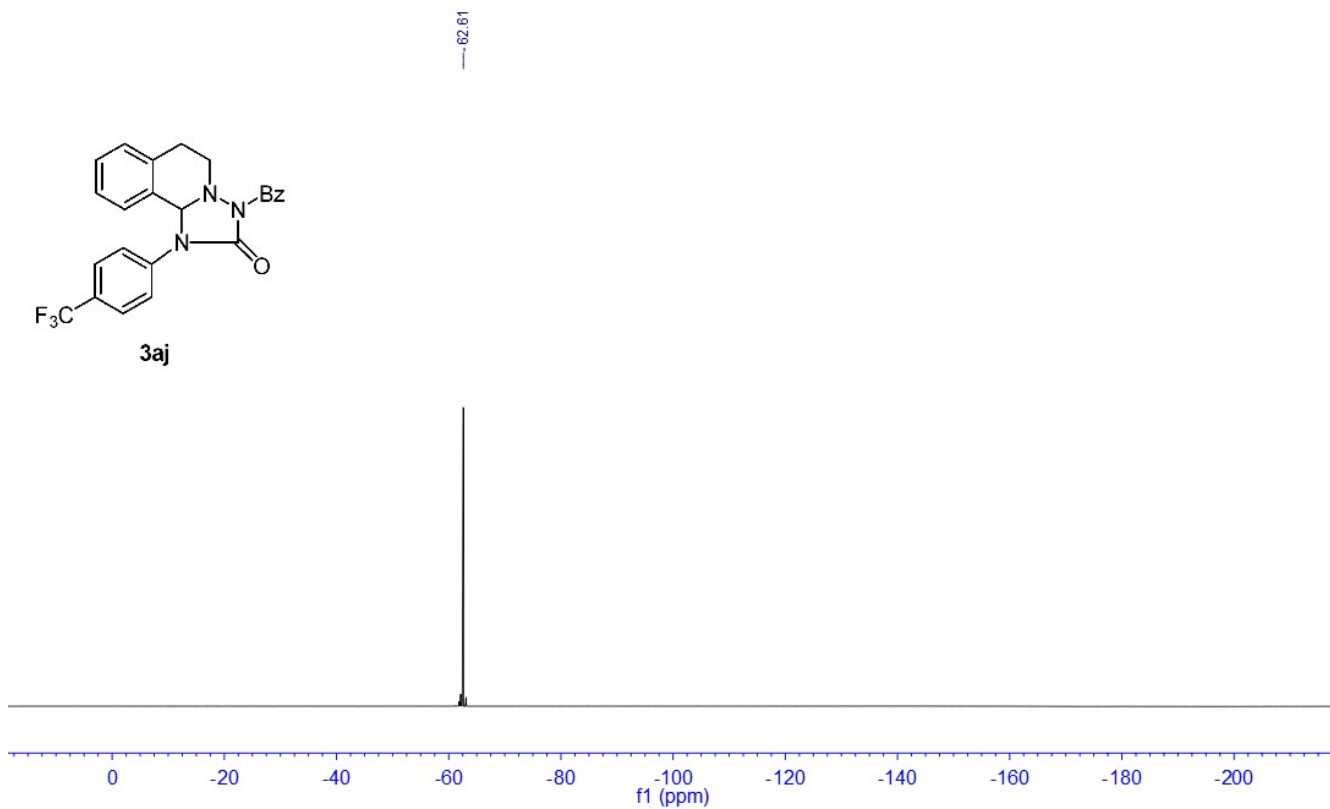

7.731  
7.728  
7.725  
7.711  
7.707  
7.493  
7.478  
7.474  
7.471  
7.430  
7.426  
7.414  
7.410  
7.393  
7.288  
7.266  
7.257  
7.251  
7.248  
7.232  
7.215  
6.983  
6.987  
6.979  
6.512  
6.483

-5.985

3.734  
3.725  
3.722  
3.713  
3.707  
3.699  
3.695  
3.687  
3.475  
3.467  
3.447  
3.439  
3.420  
3.412  
3.286  
3.274  
3.245  
3.233  
3.216  
3.204  
3.017  
3.008  
3.000  
2.975  
2.967  
2.958

0.000

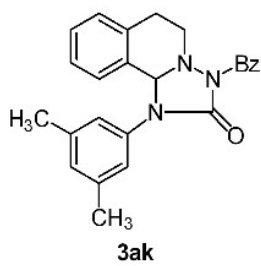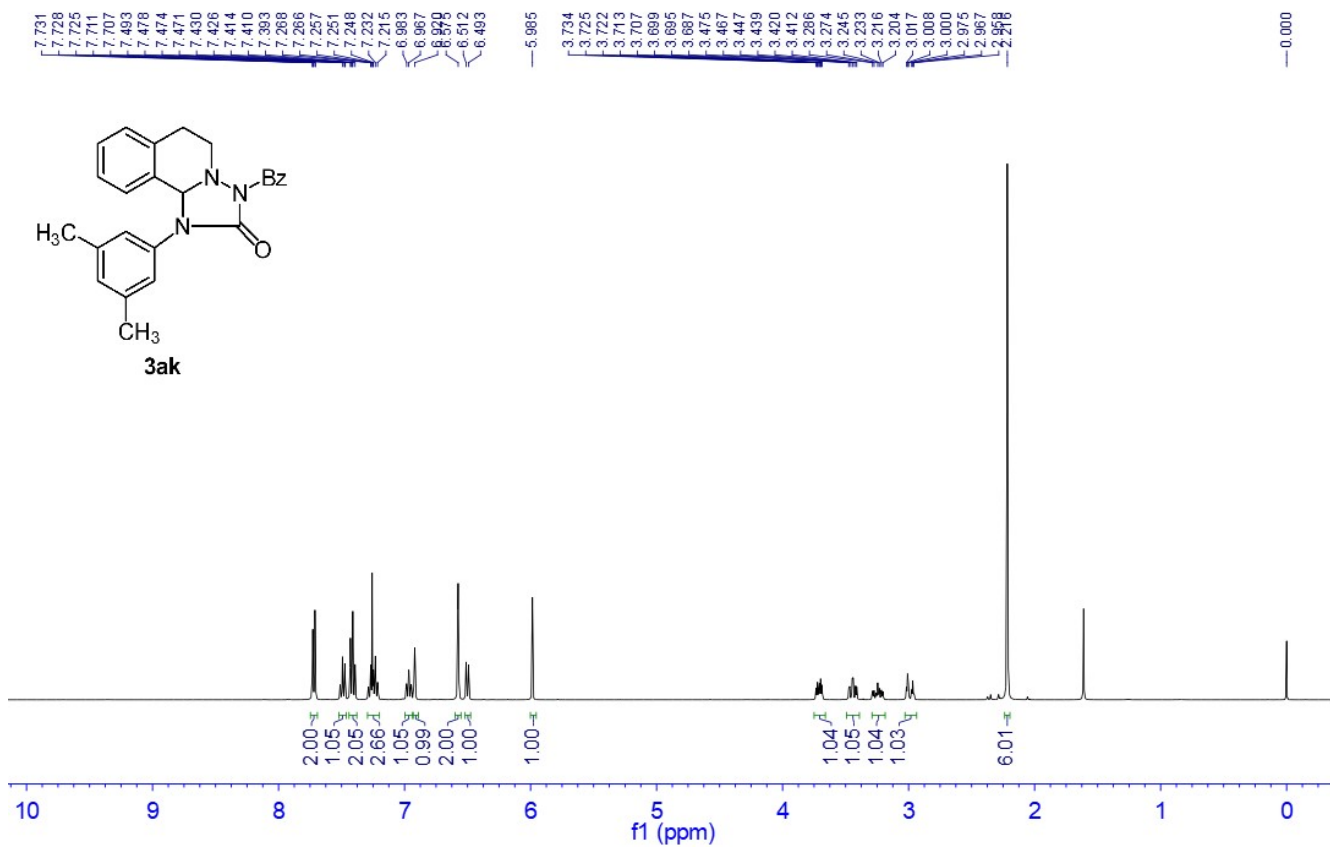

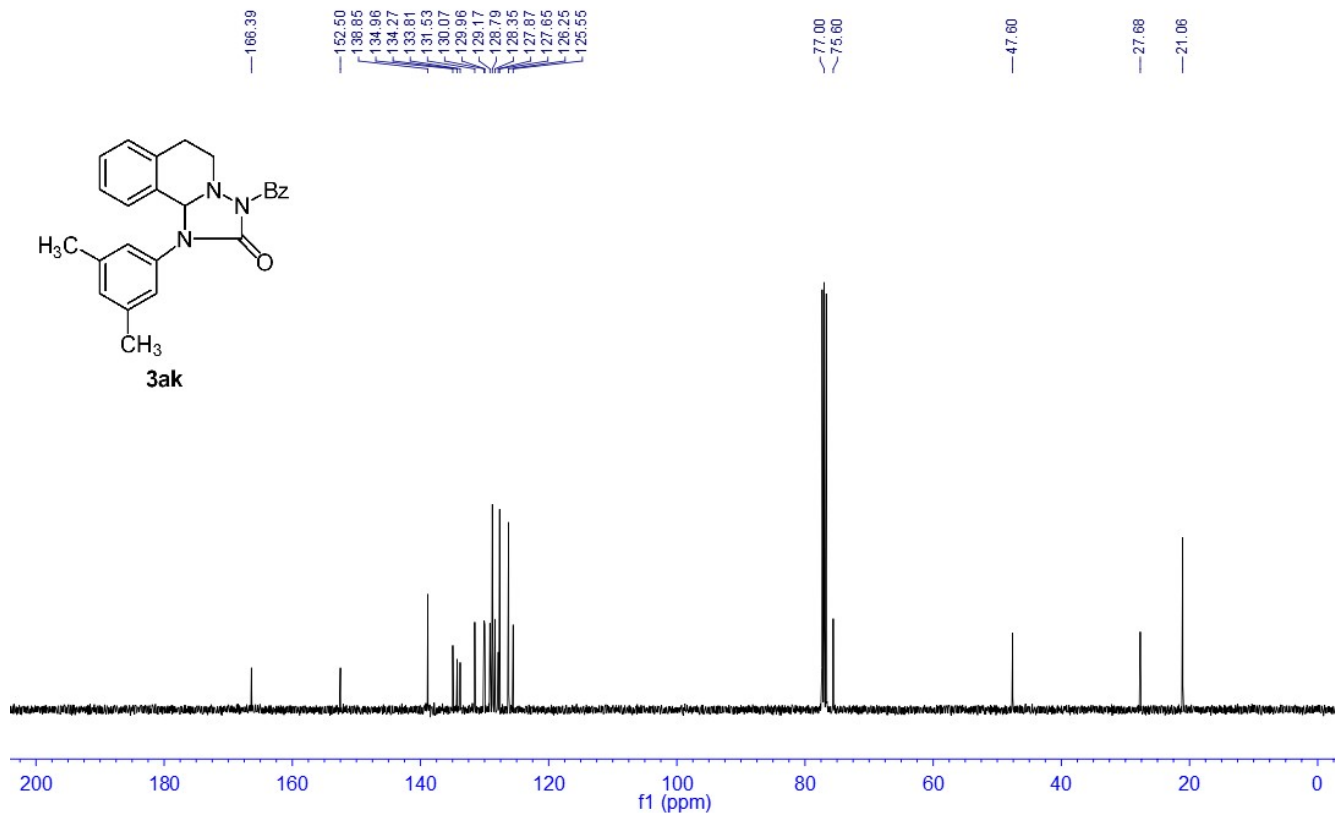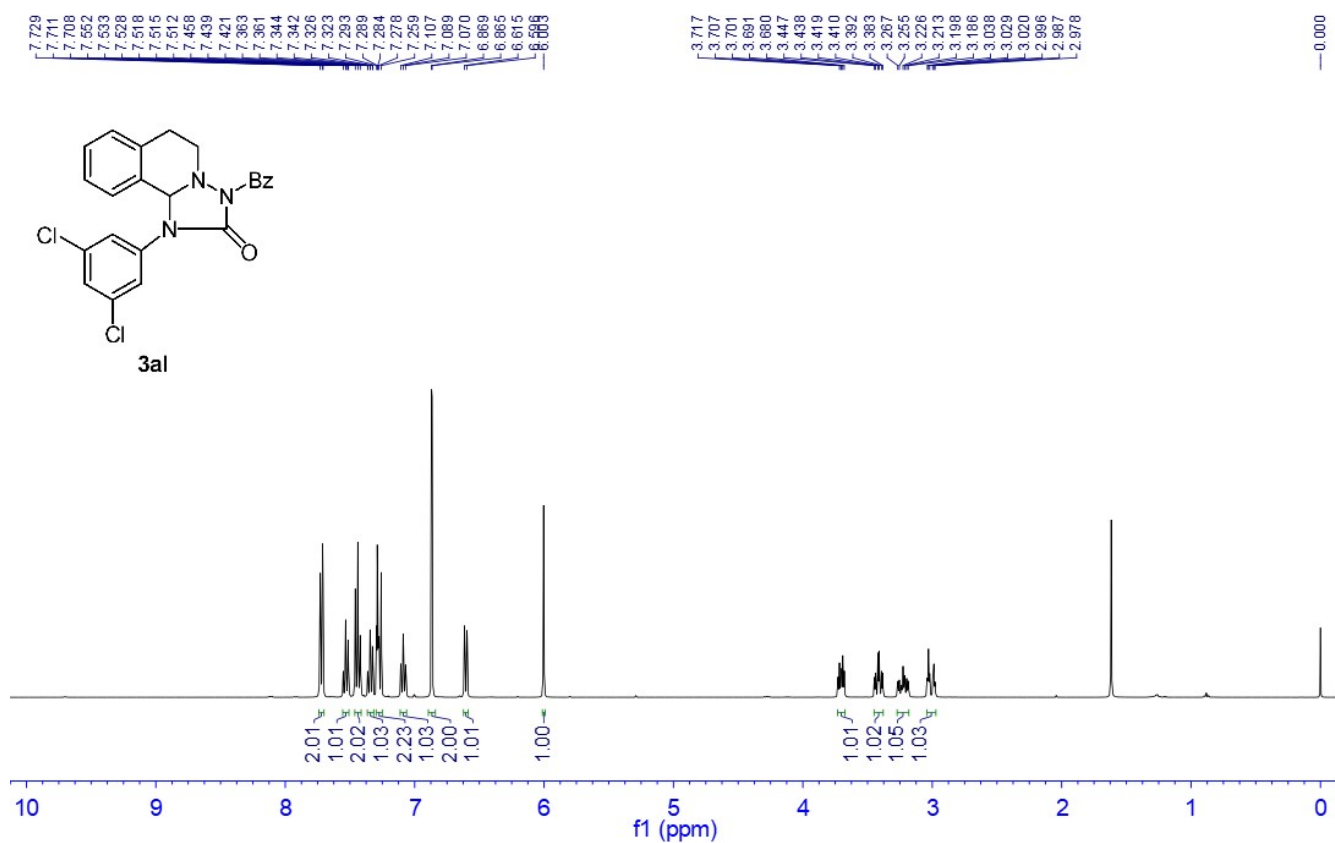

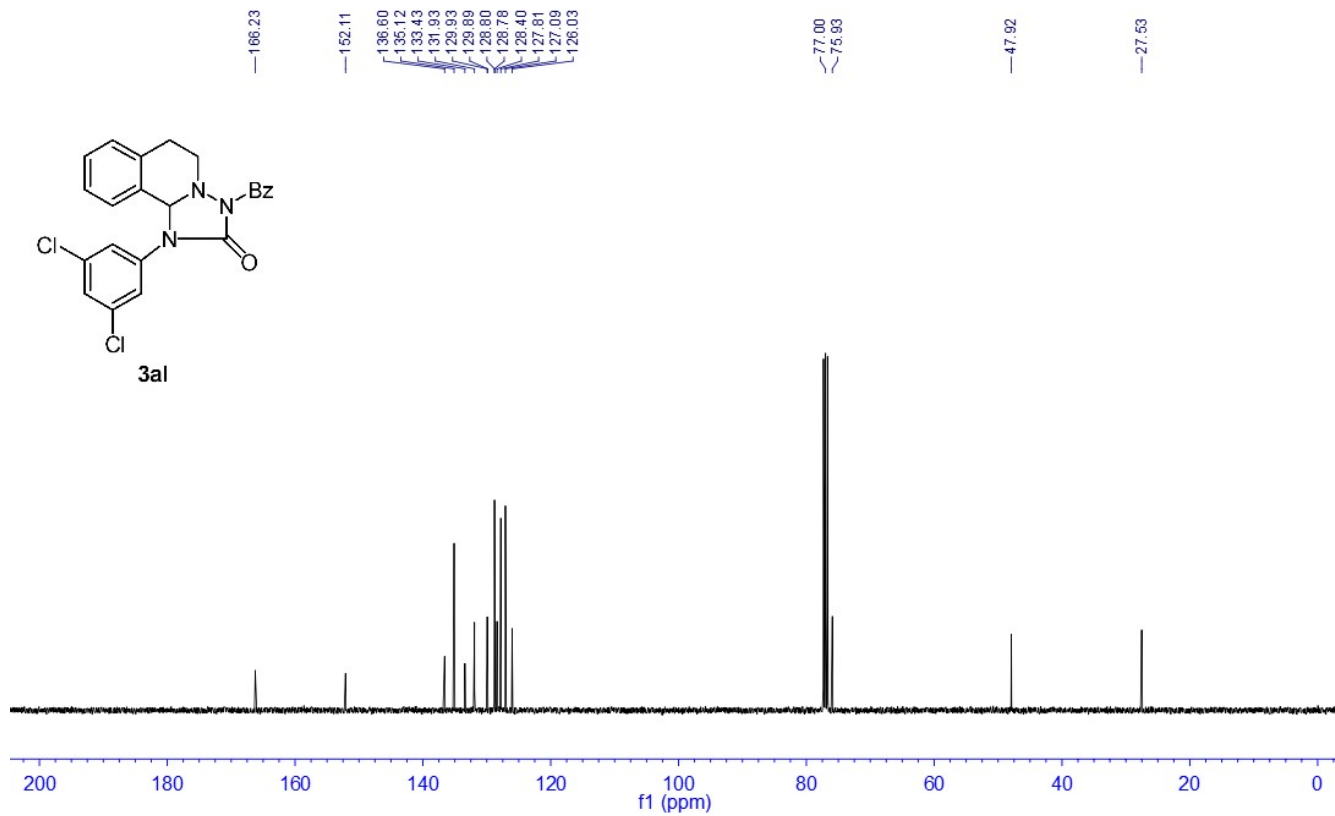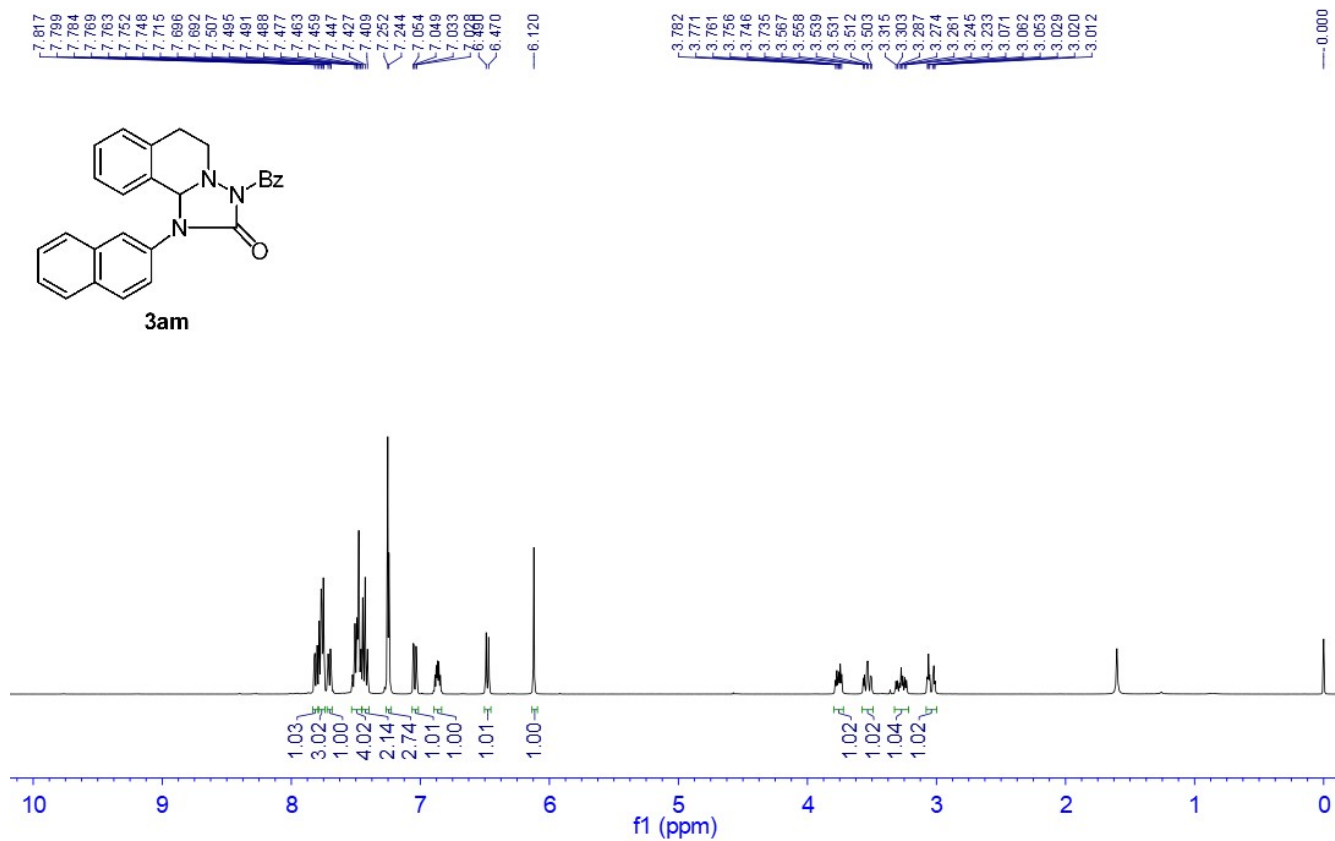

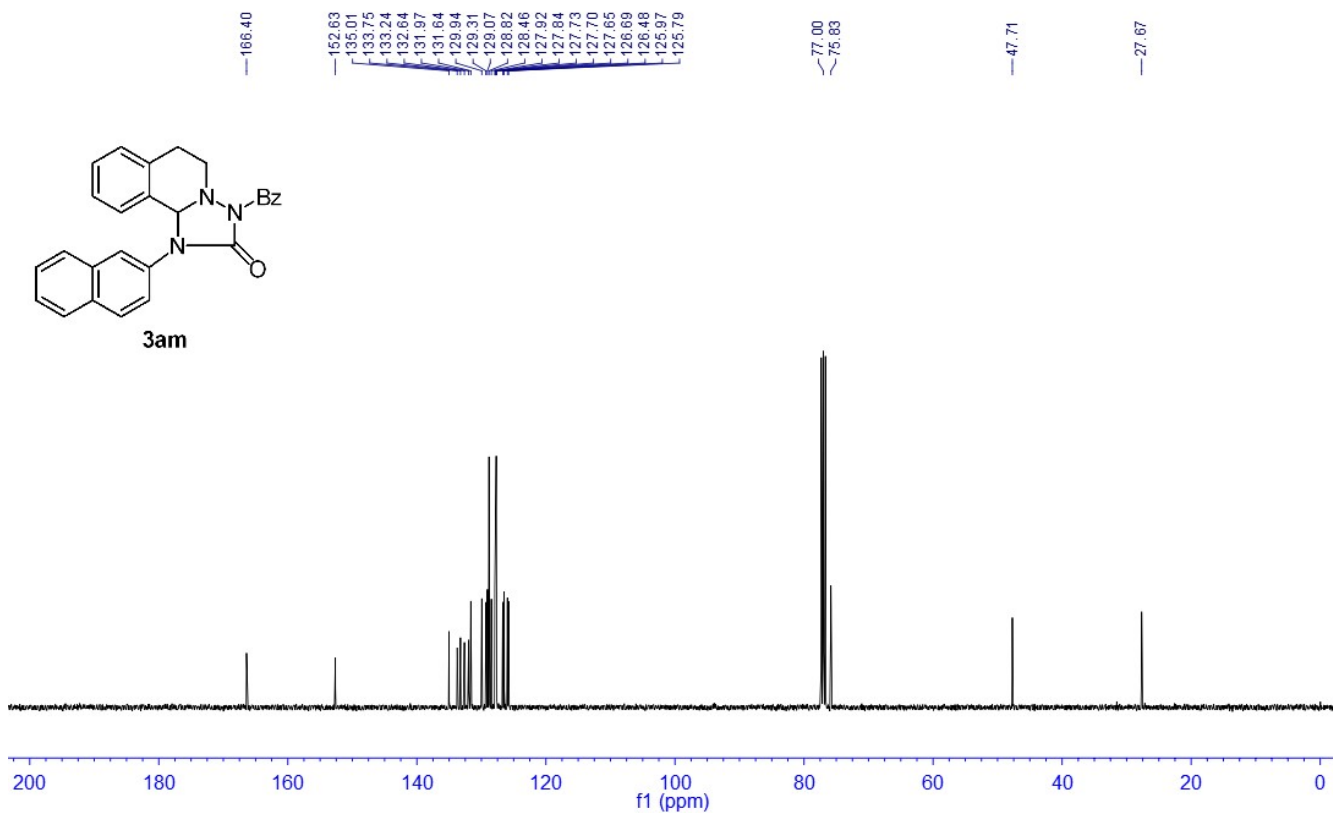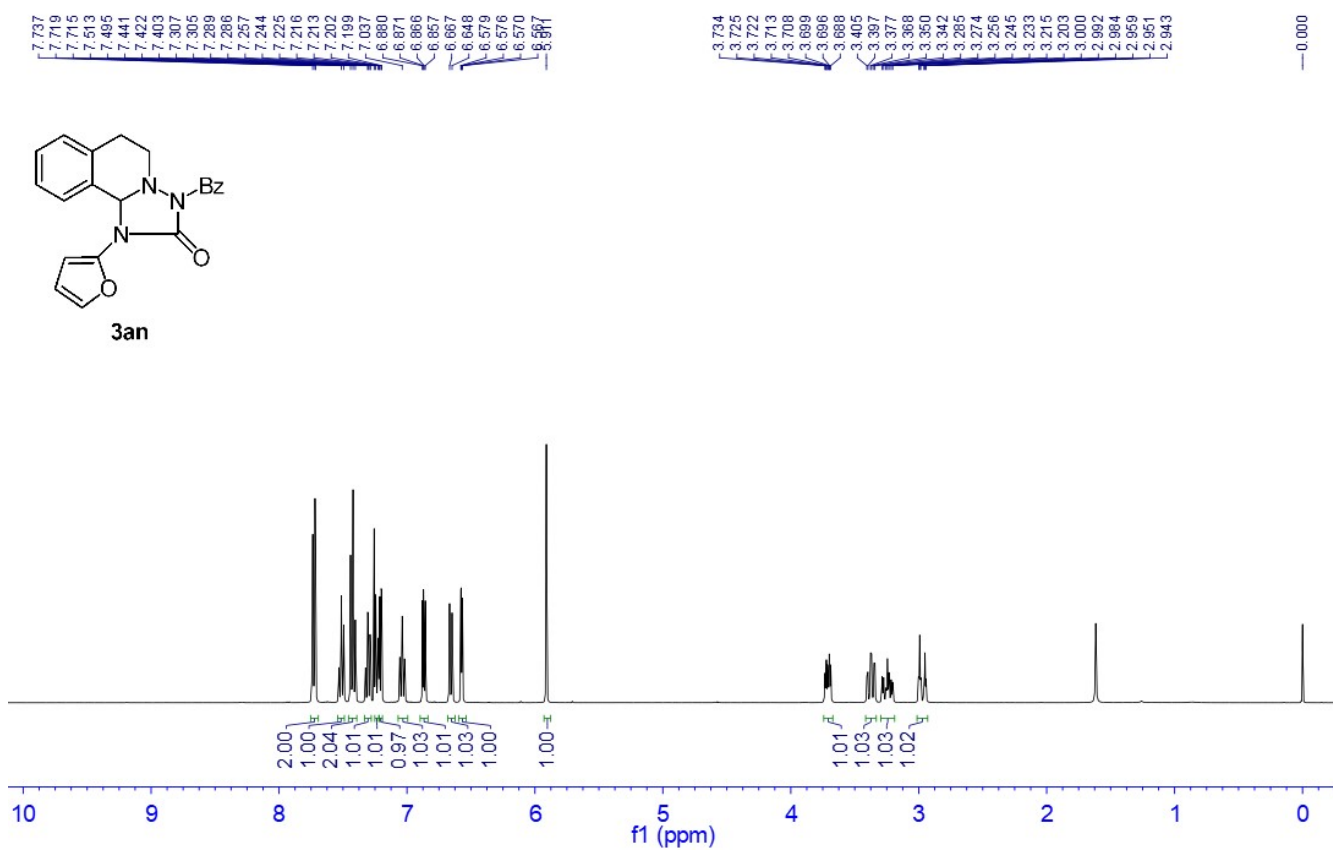

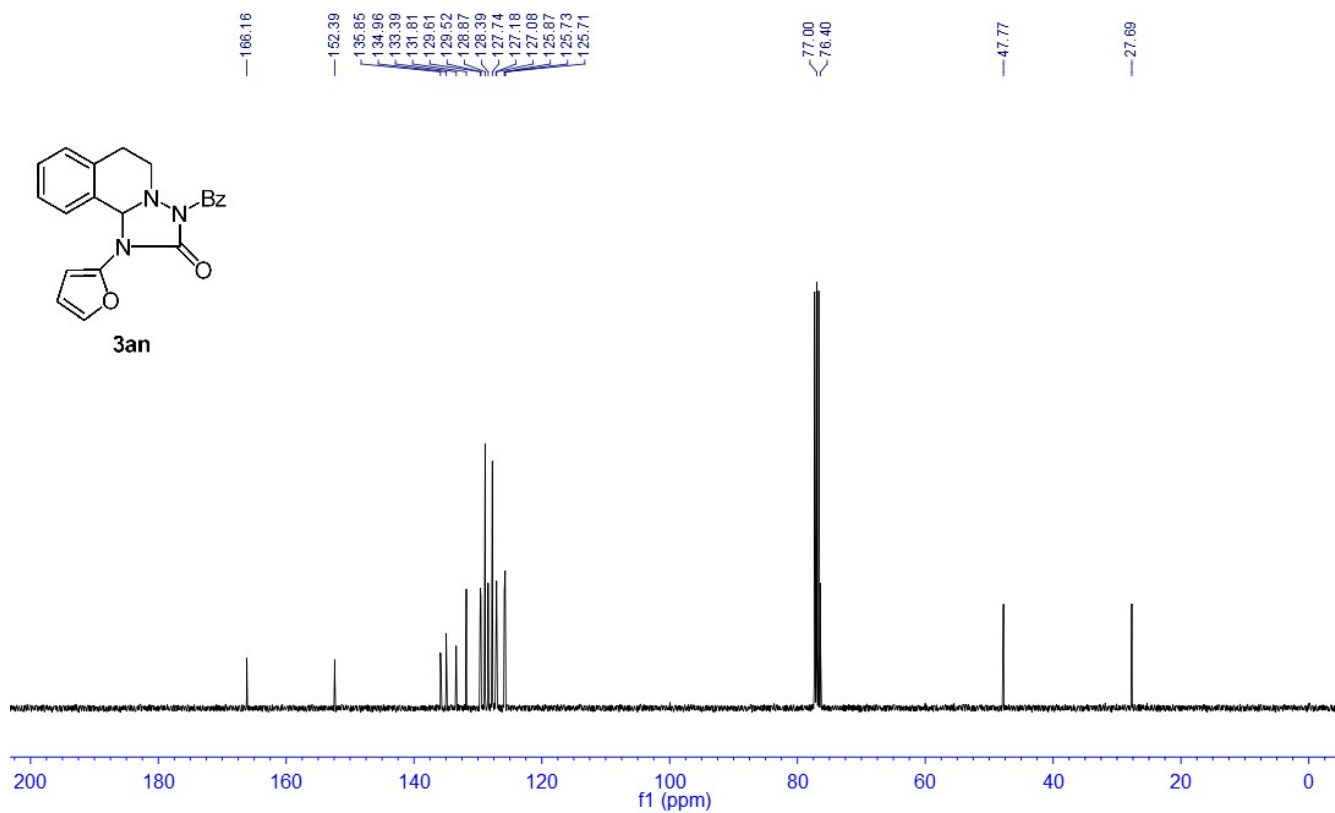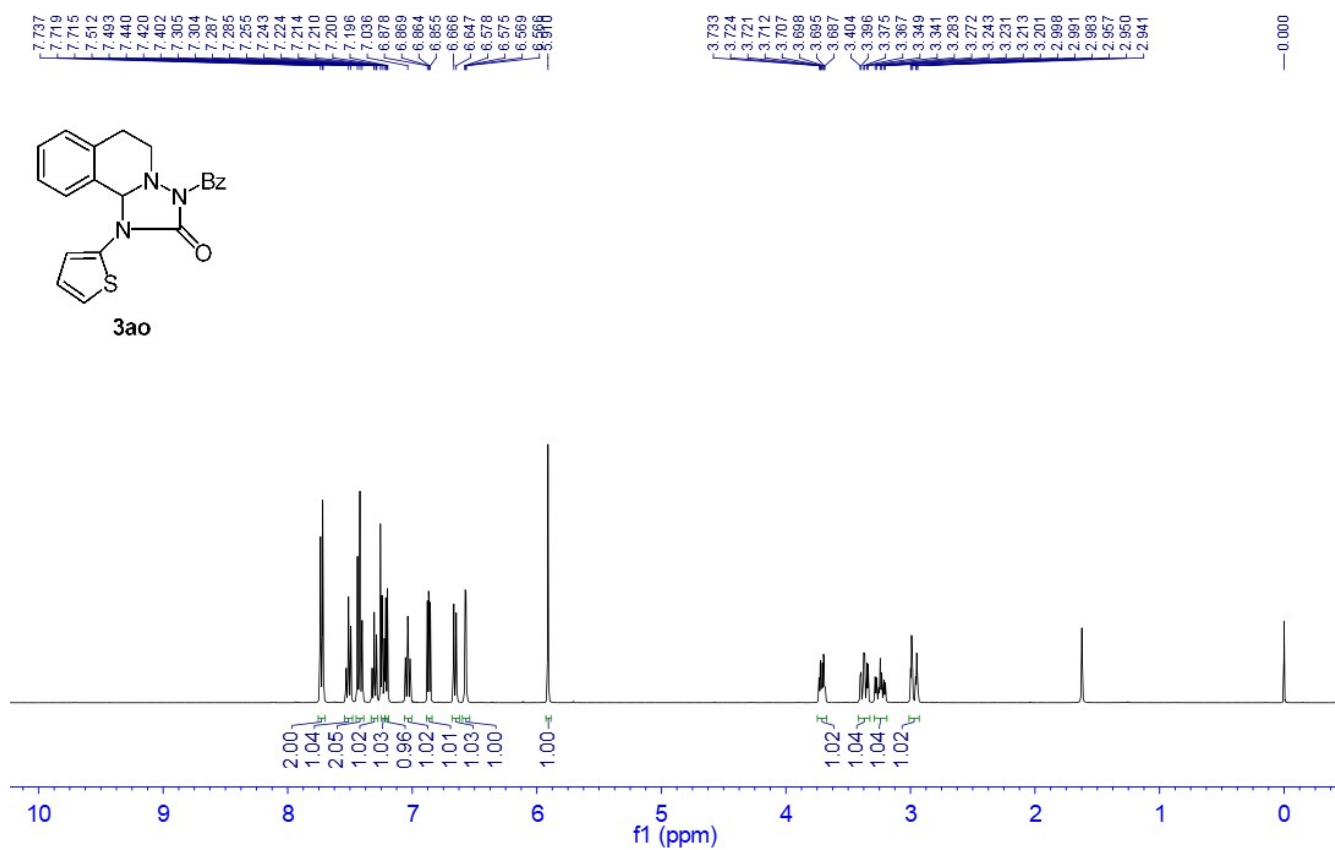

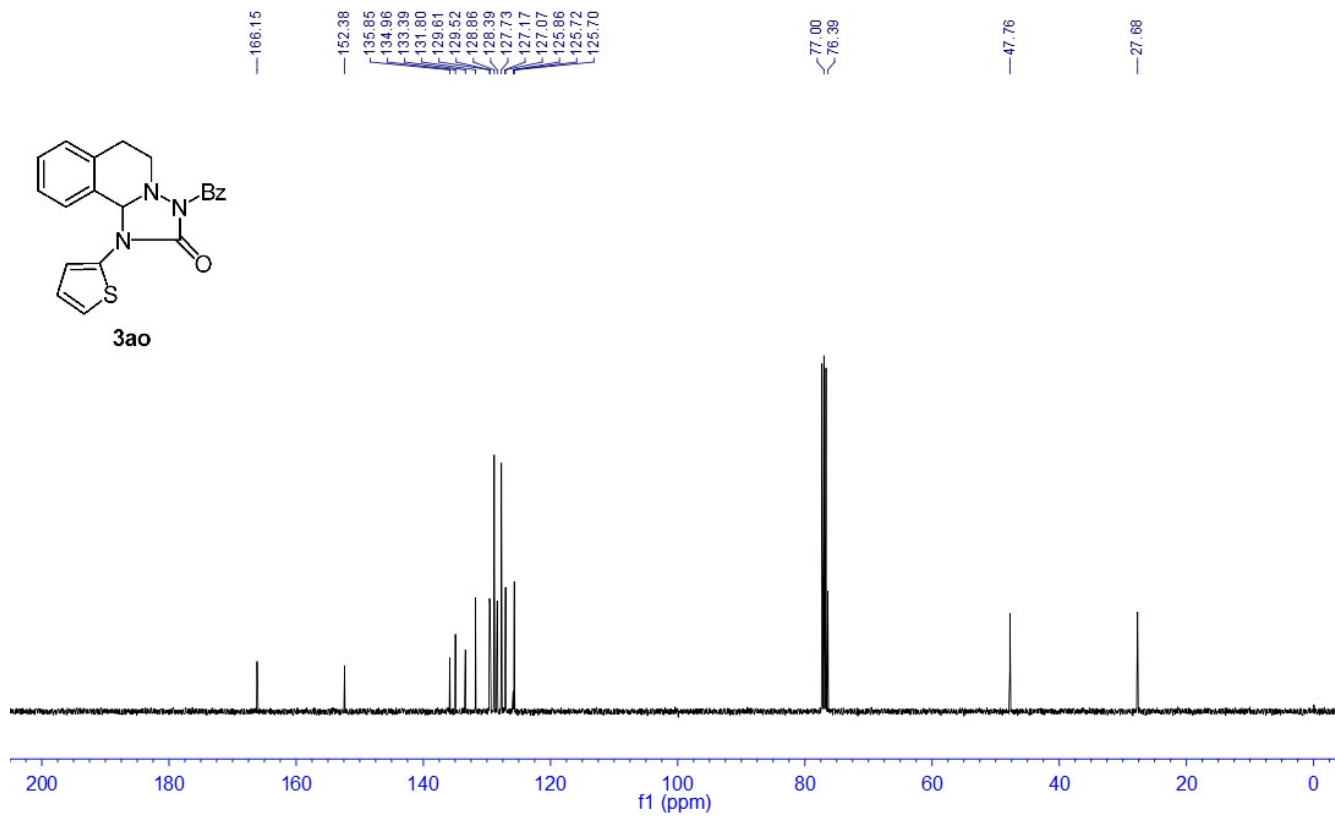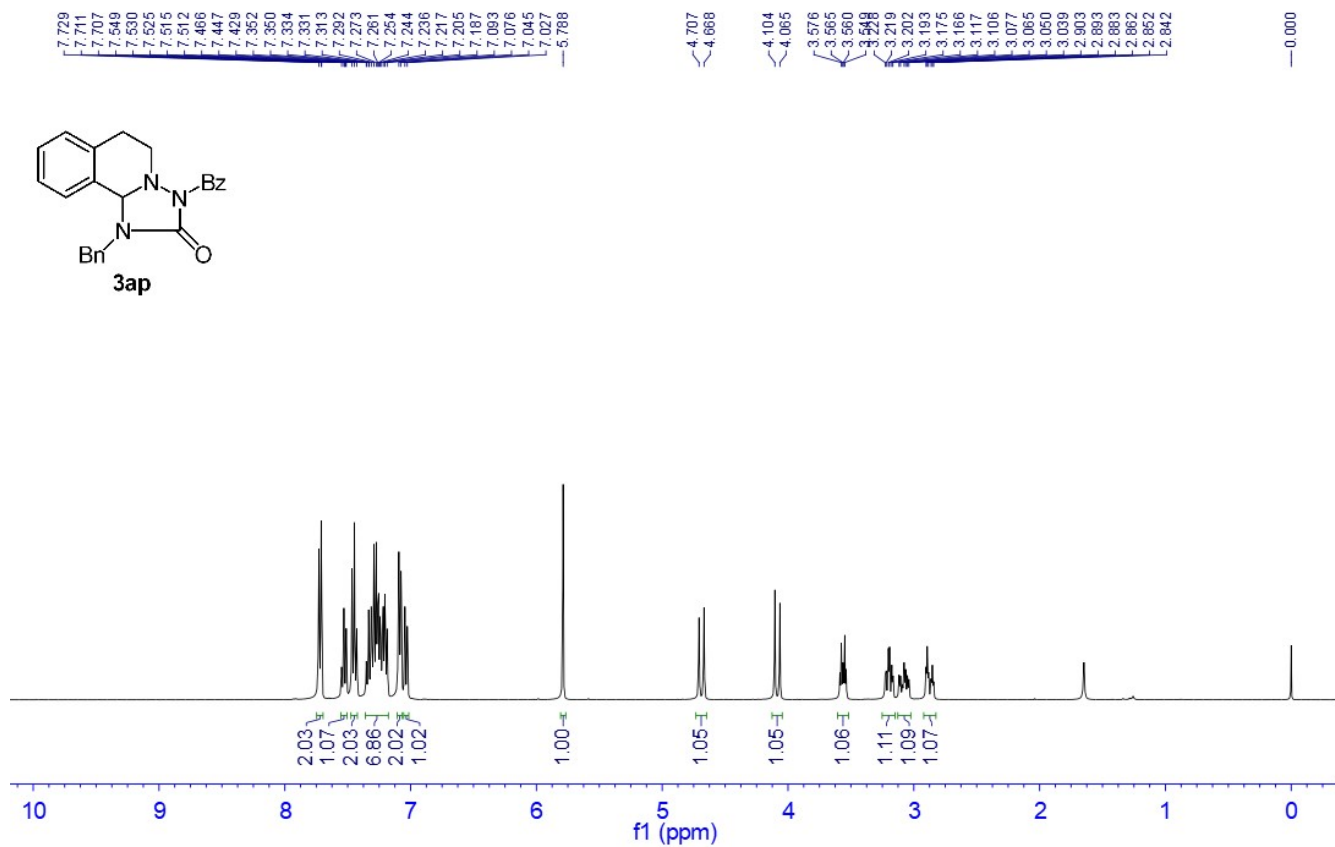

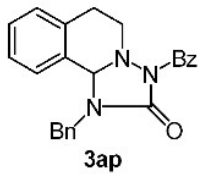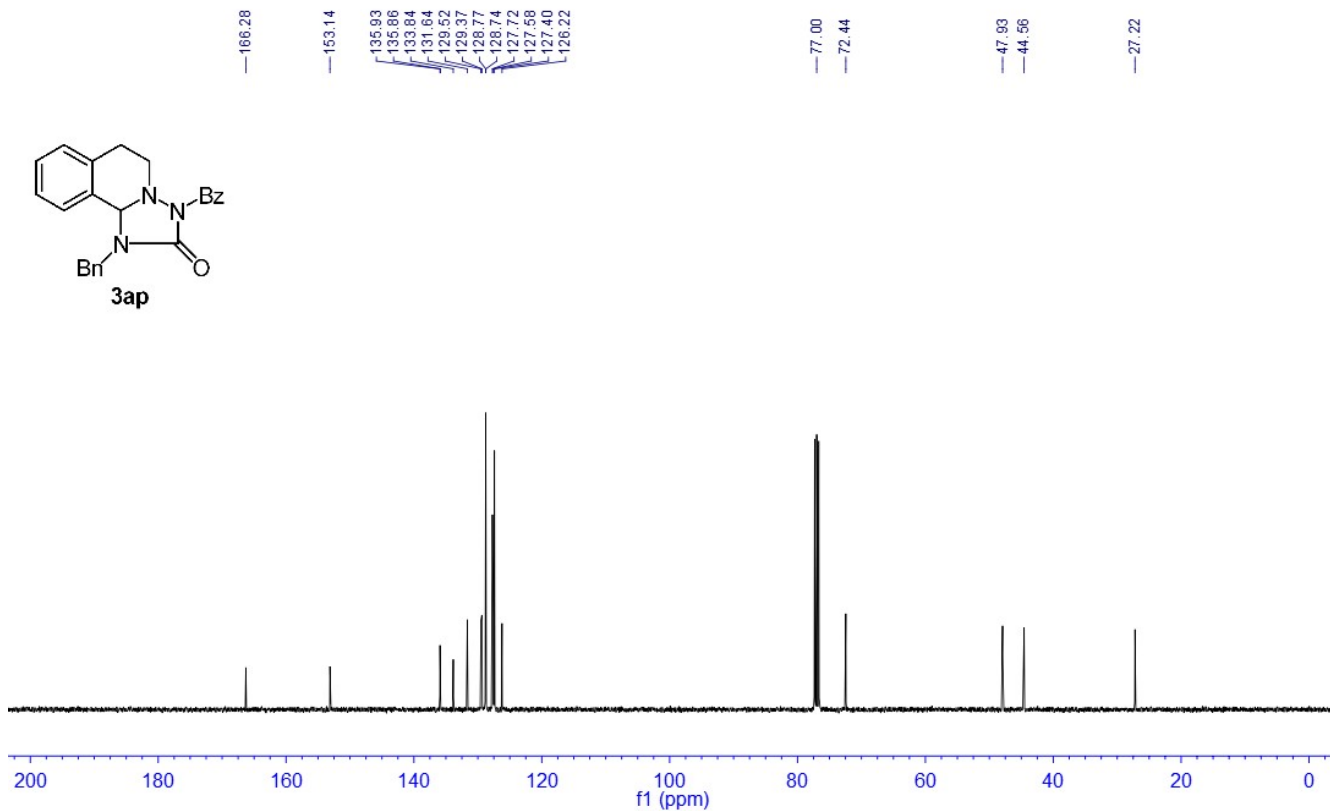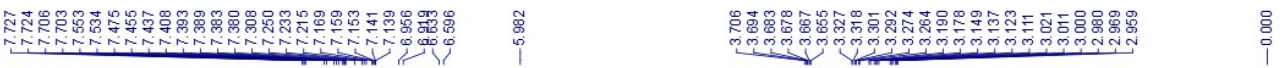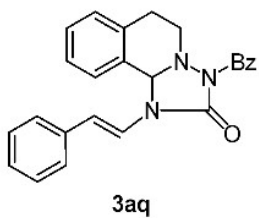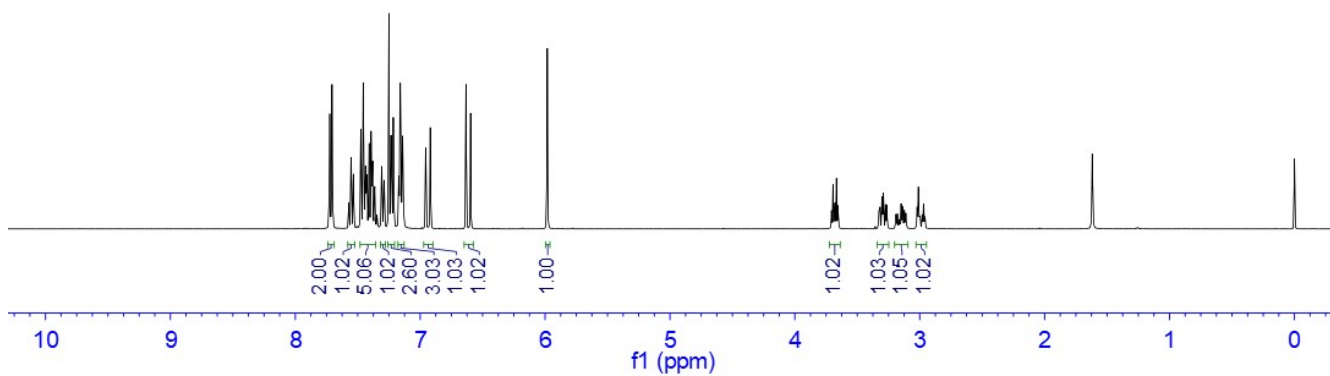



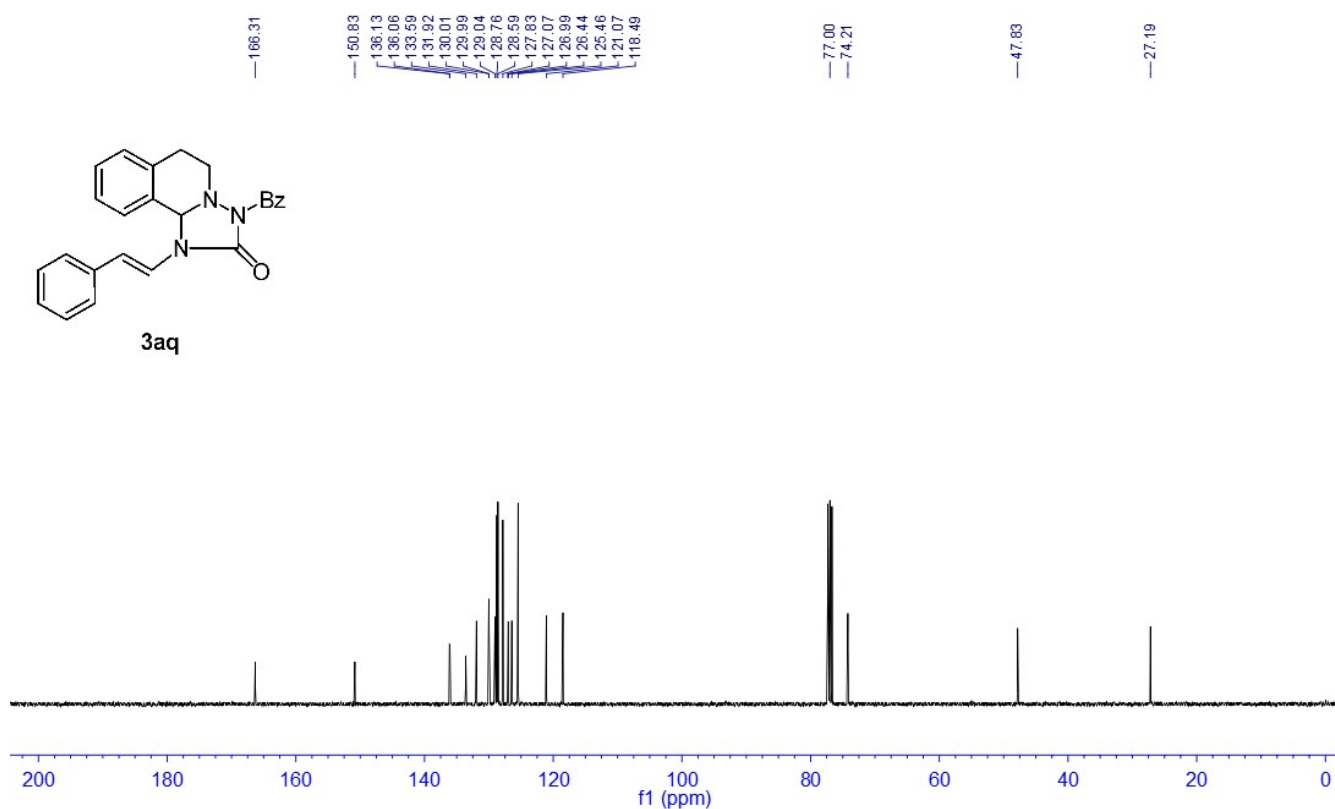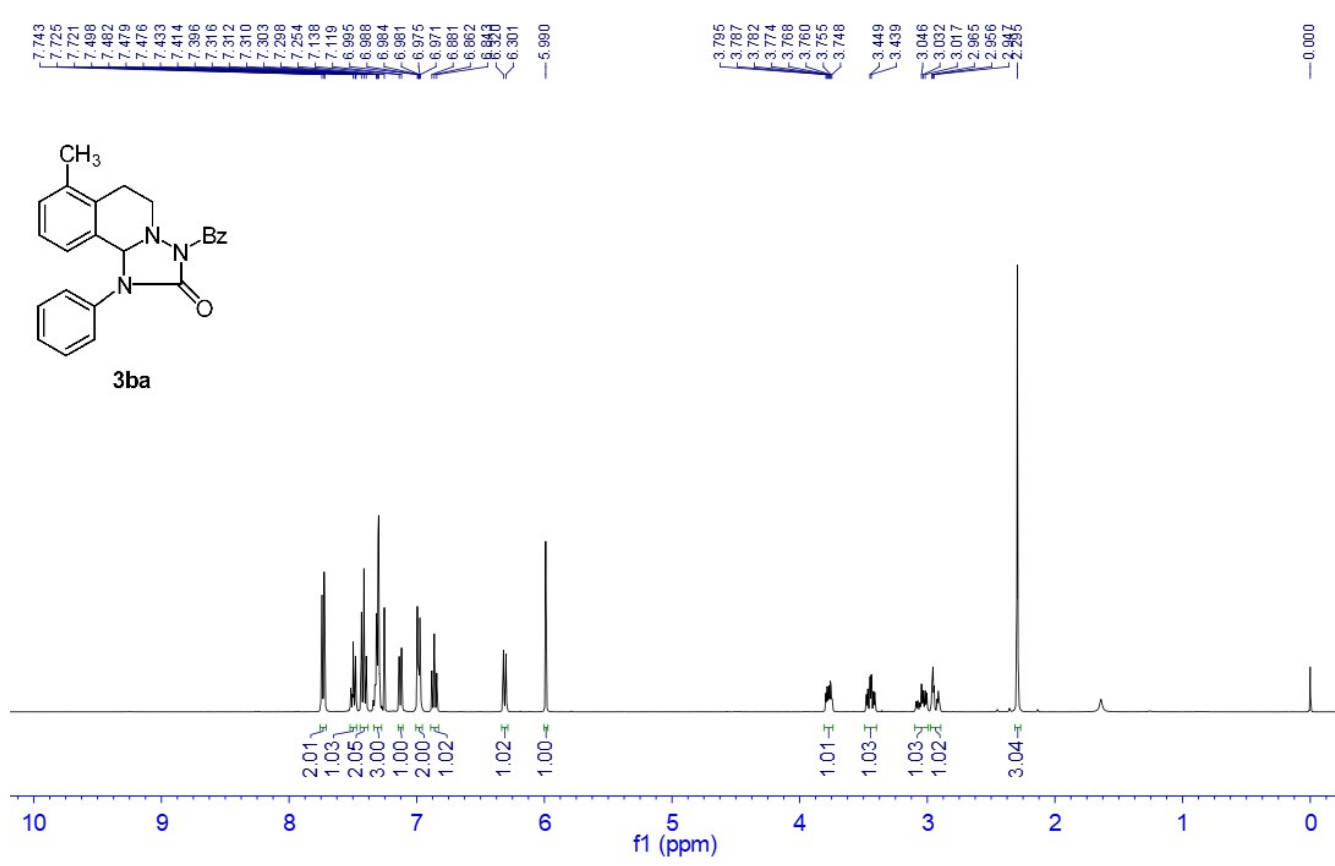

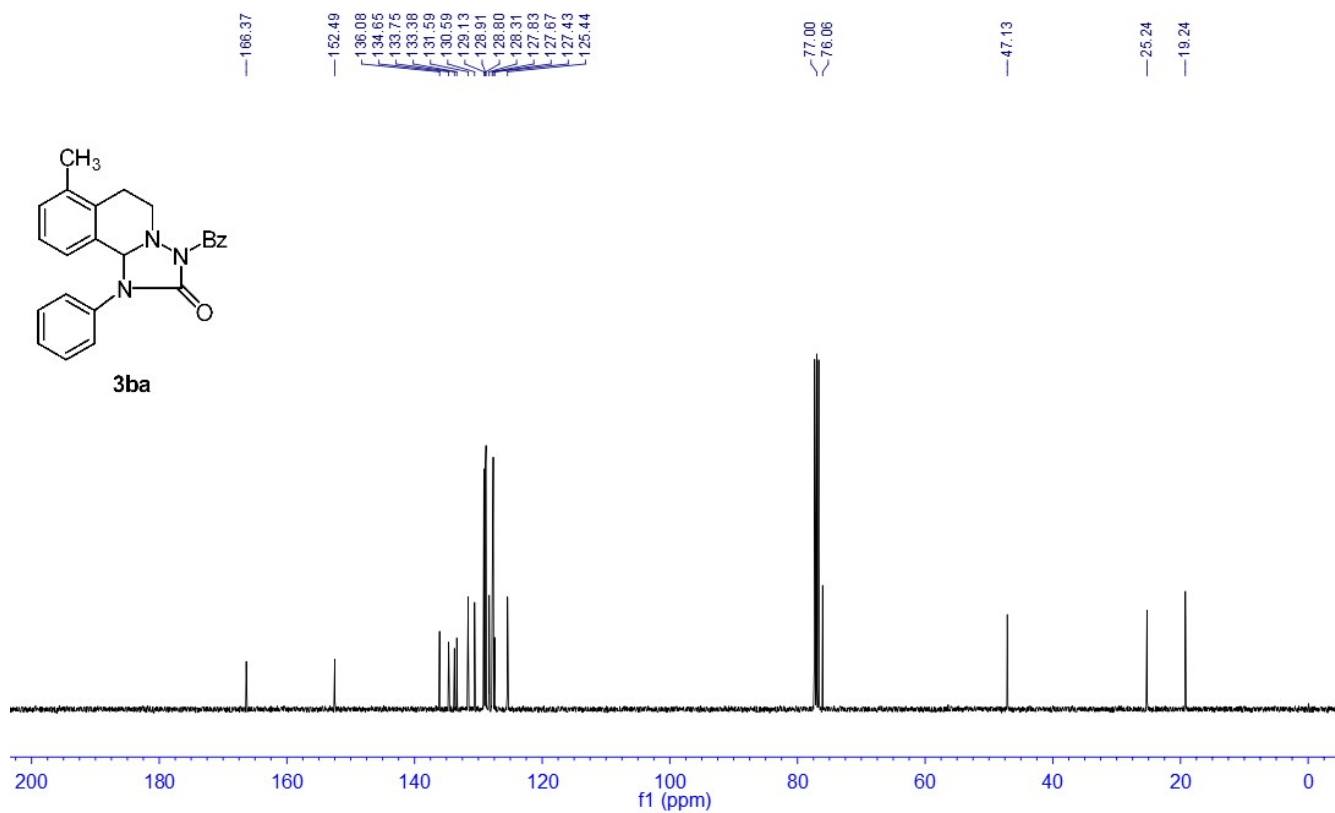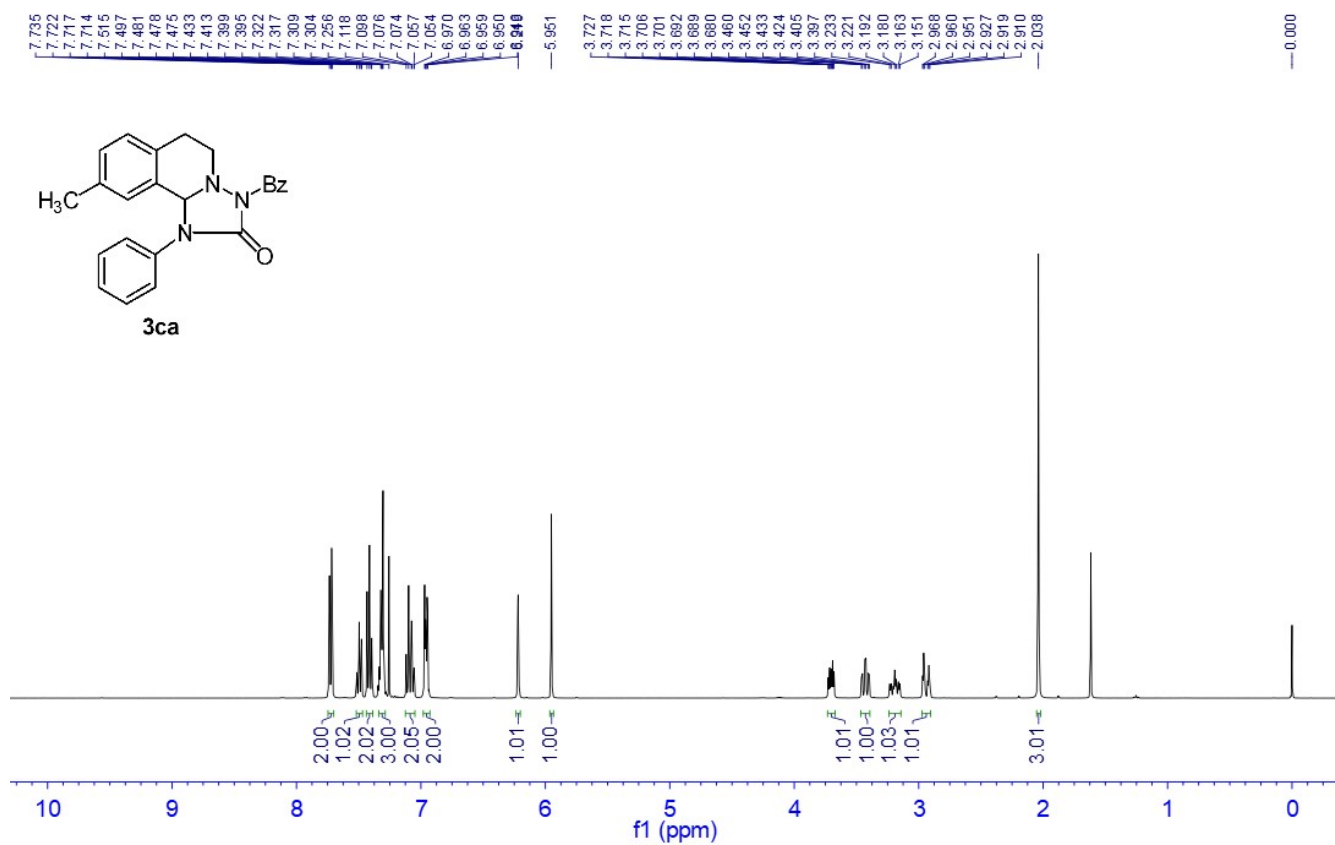

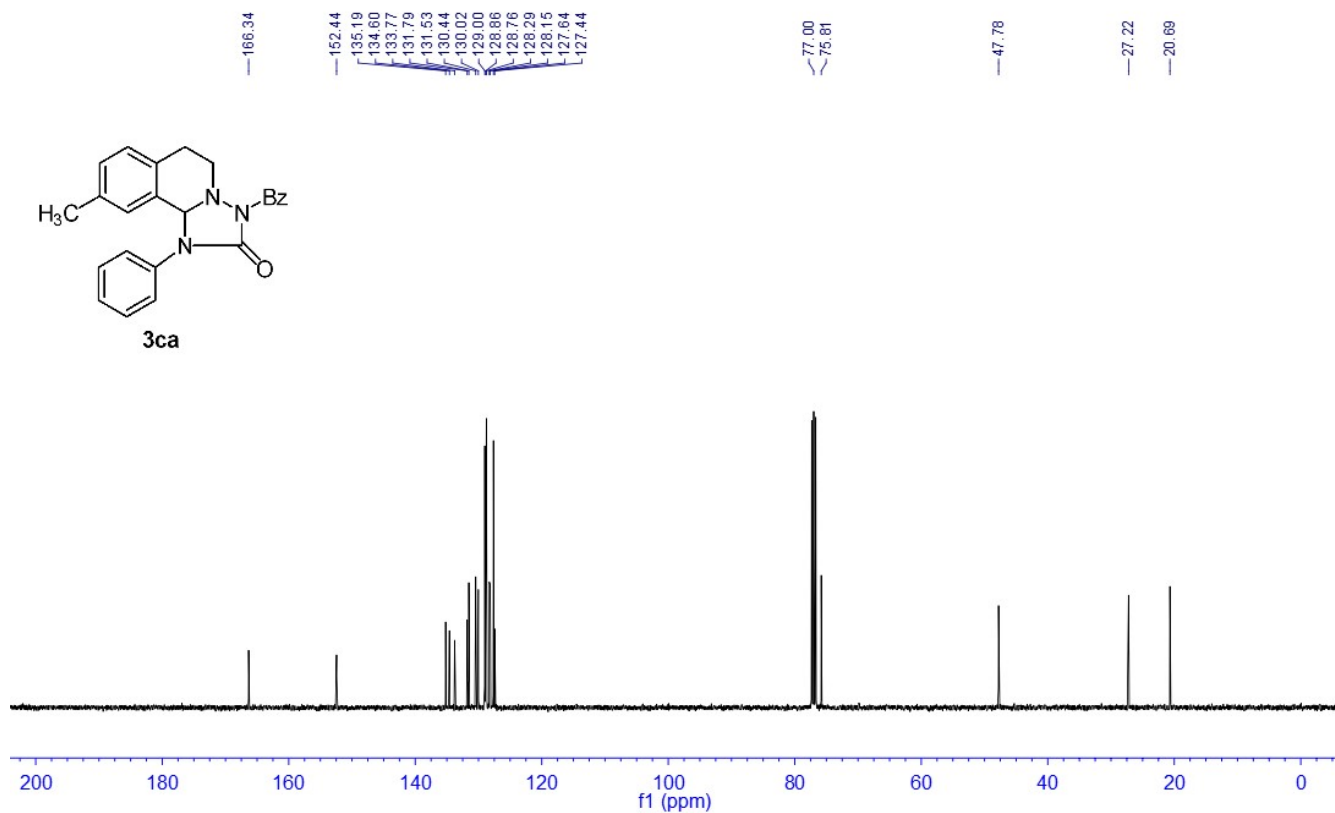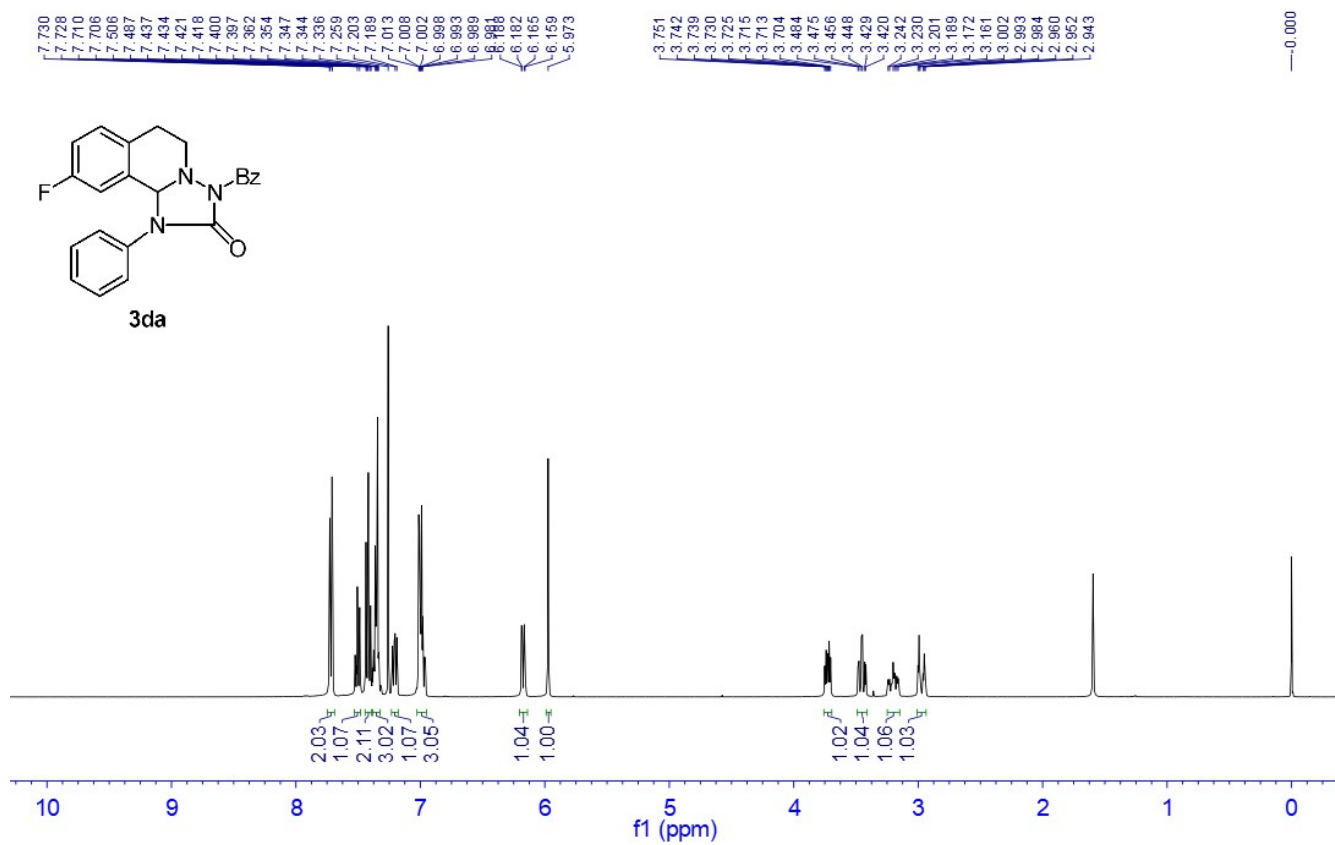

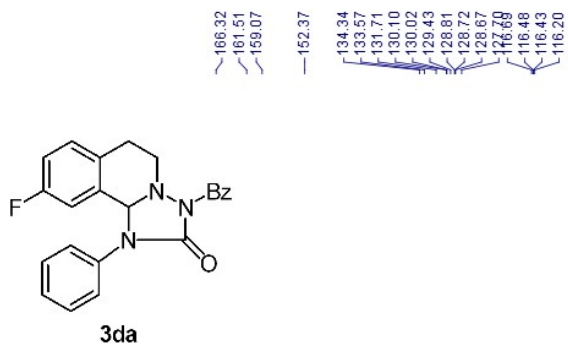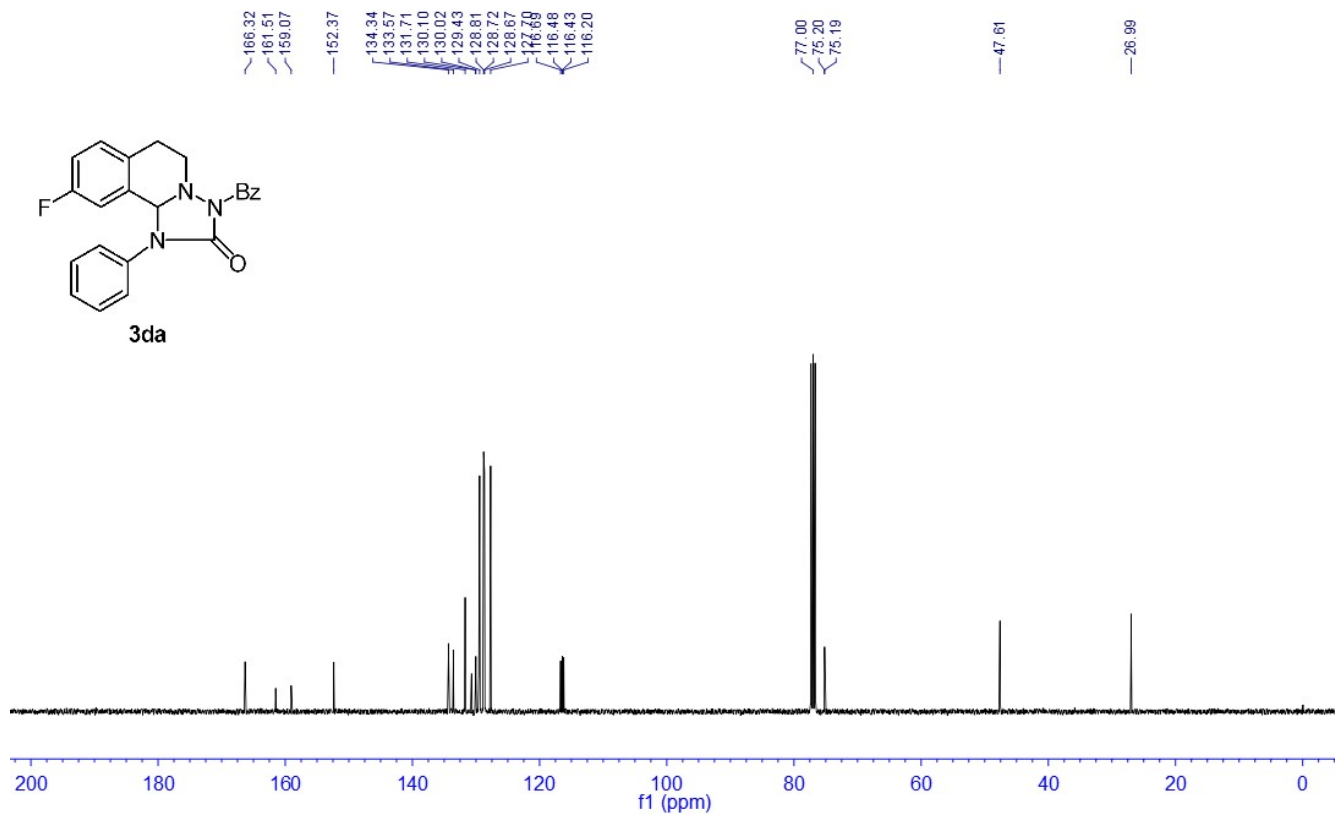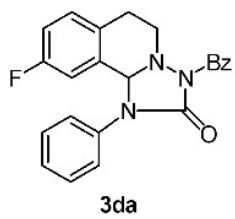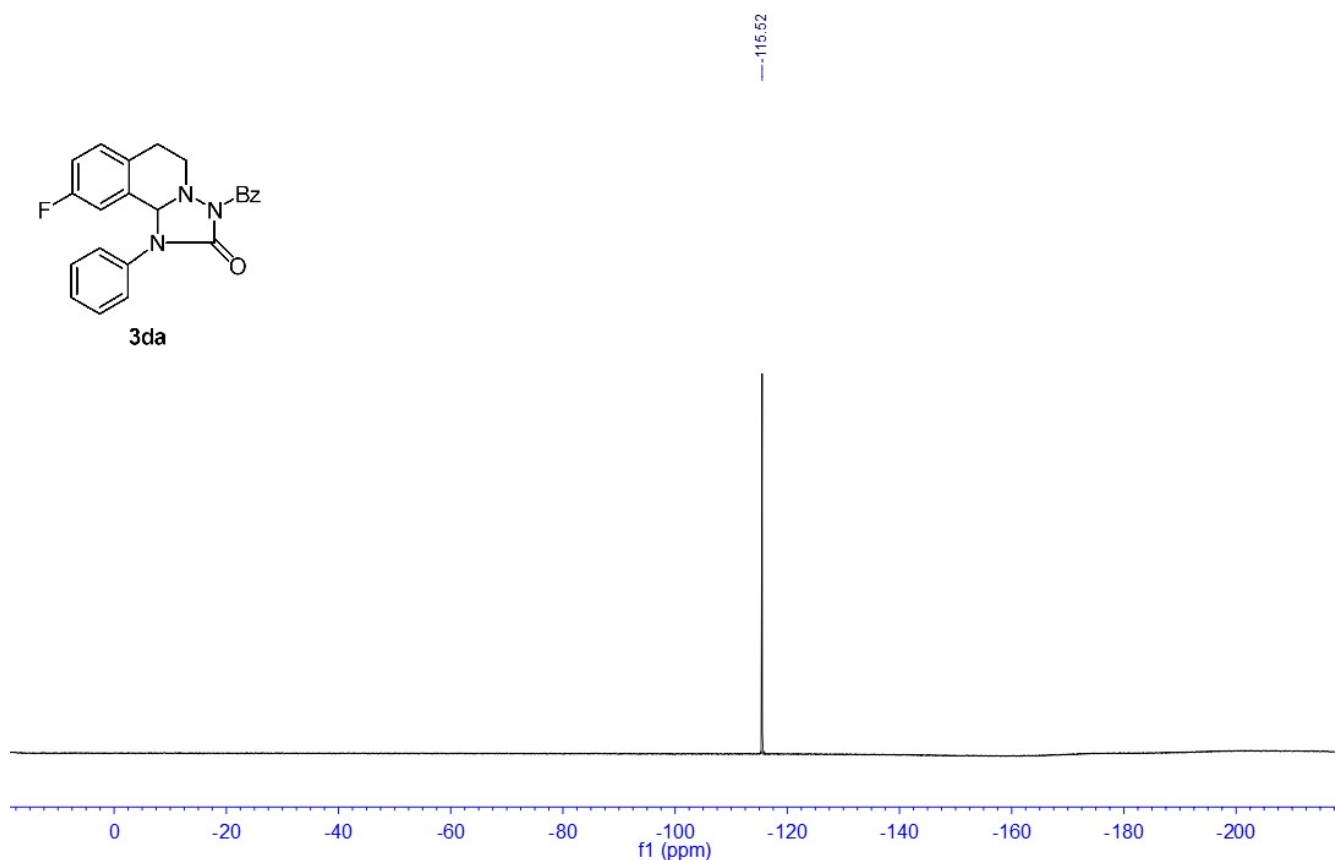

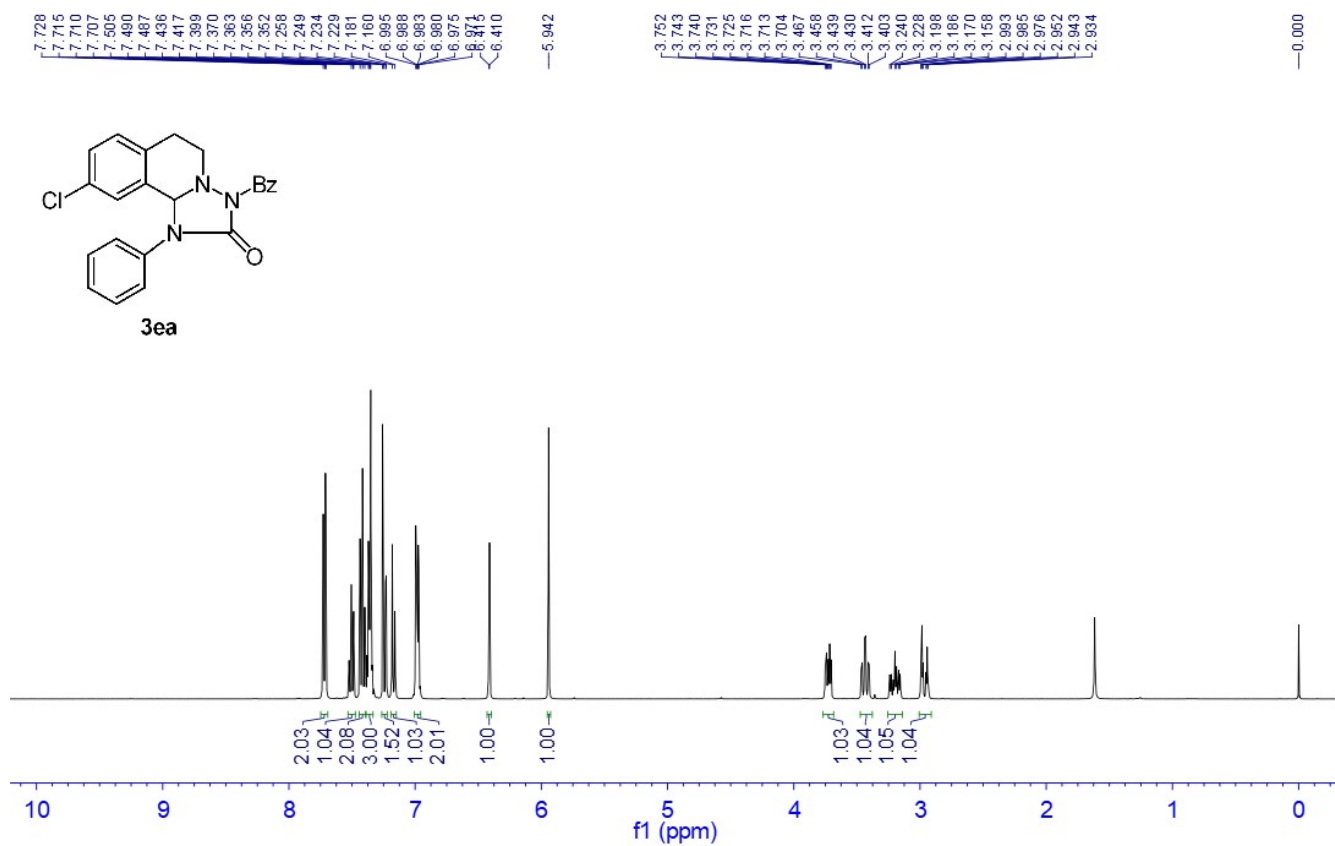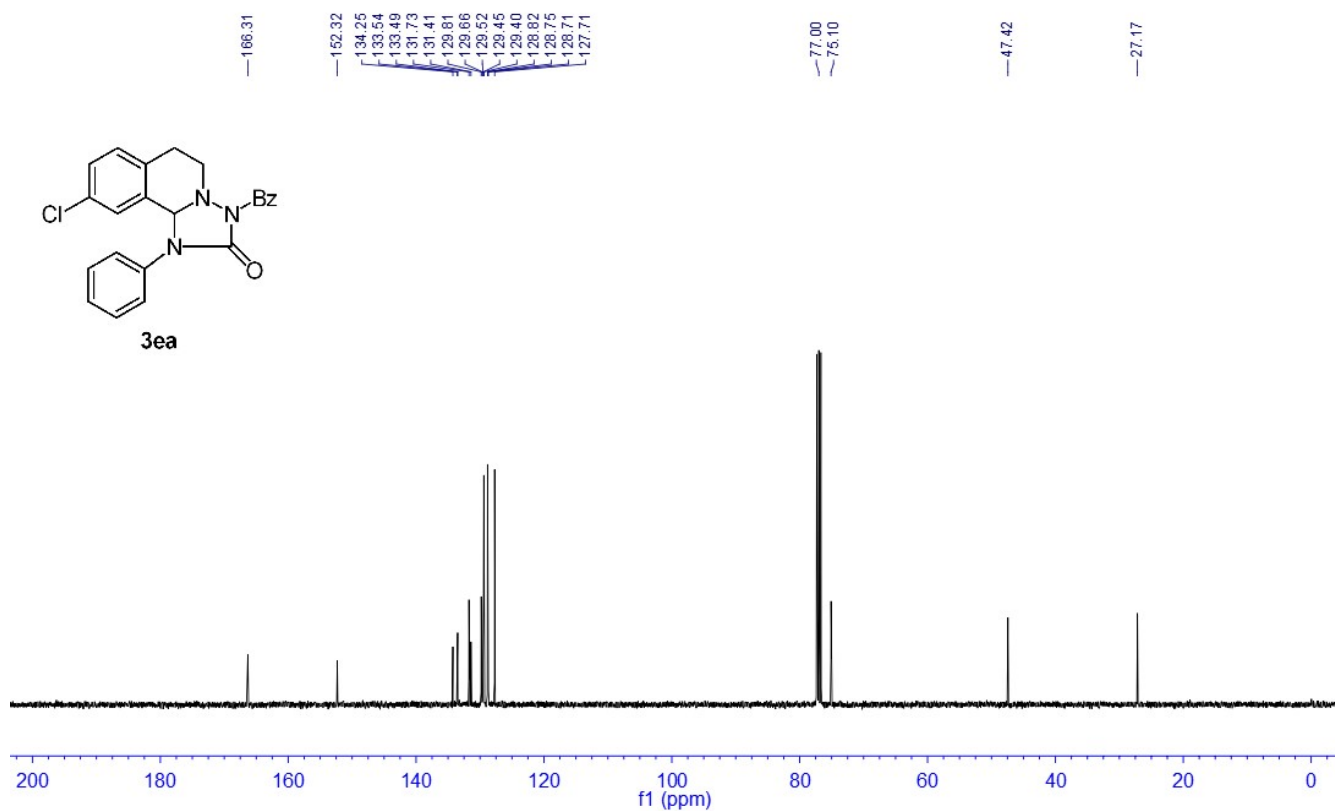

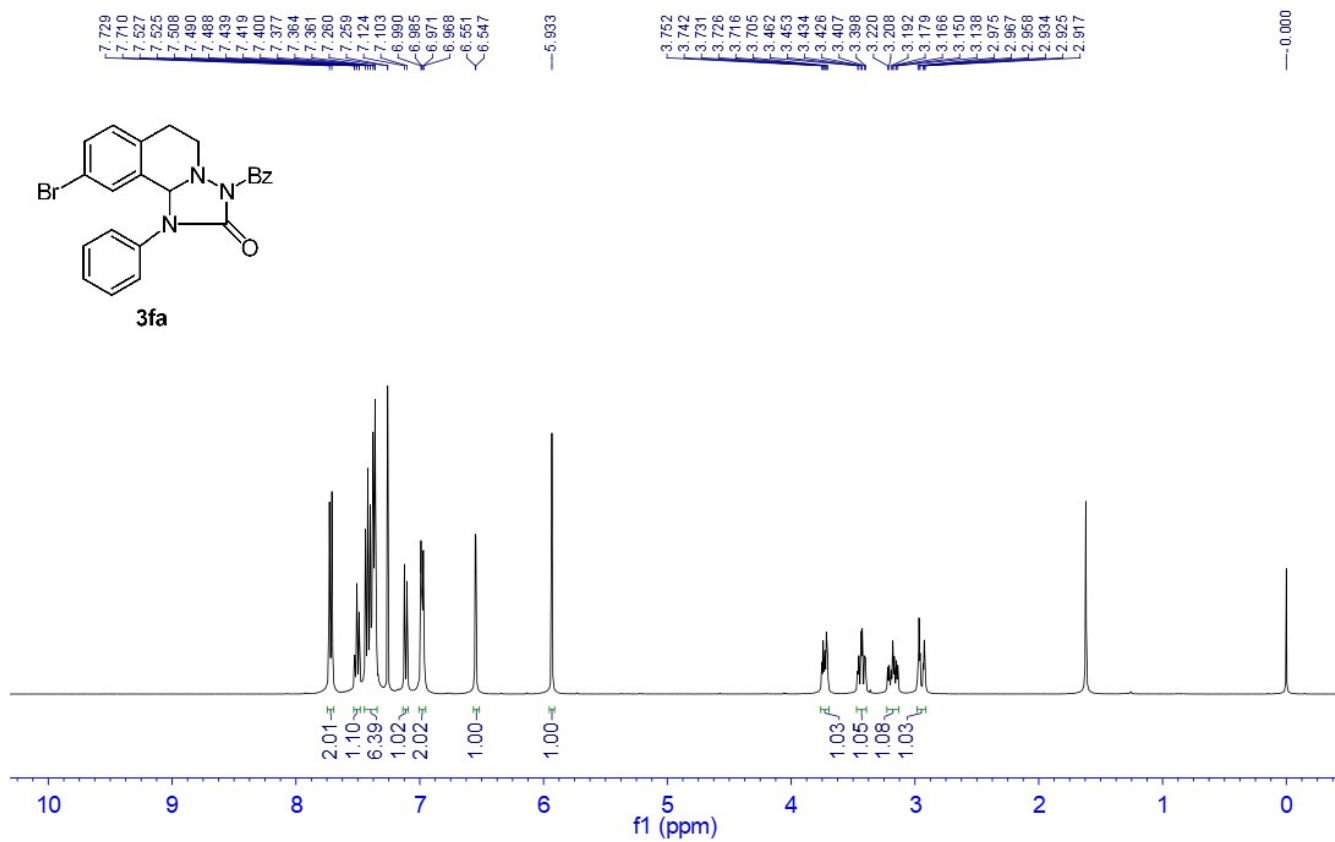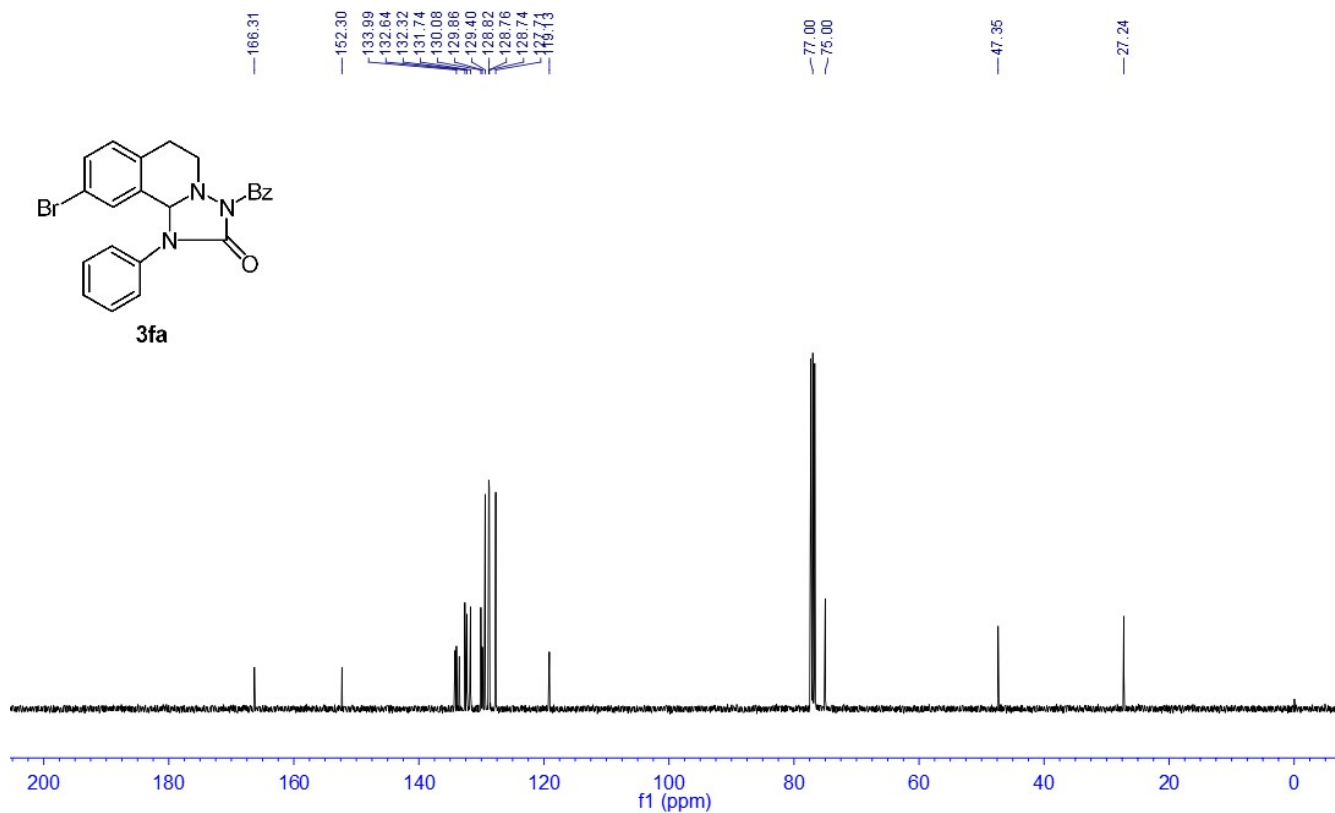

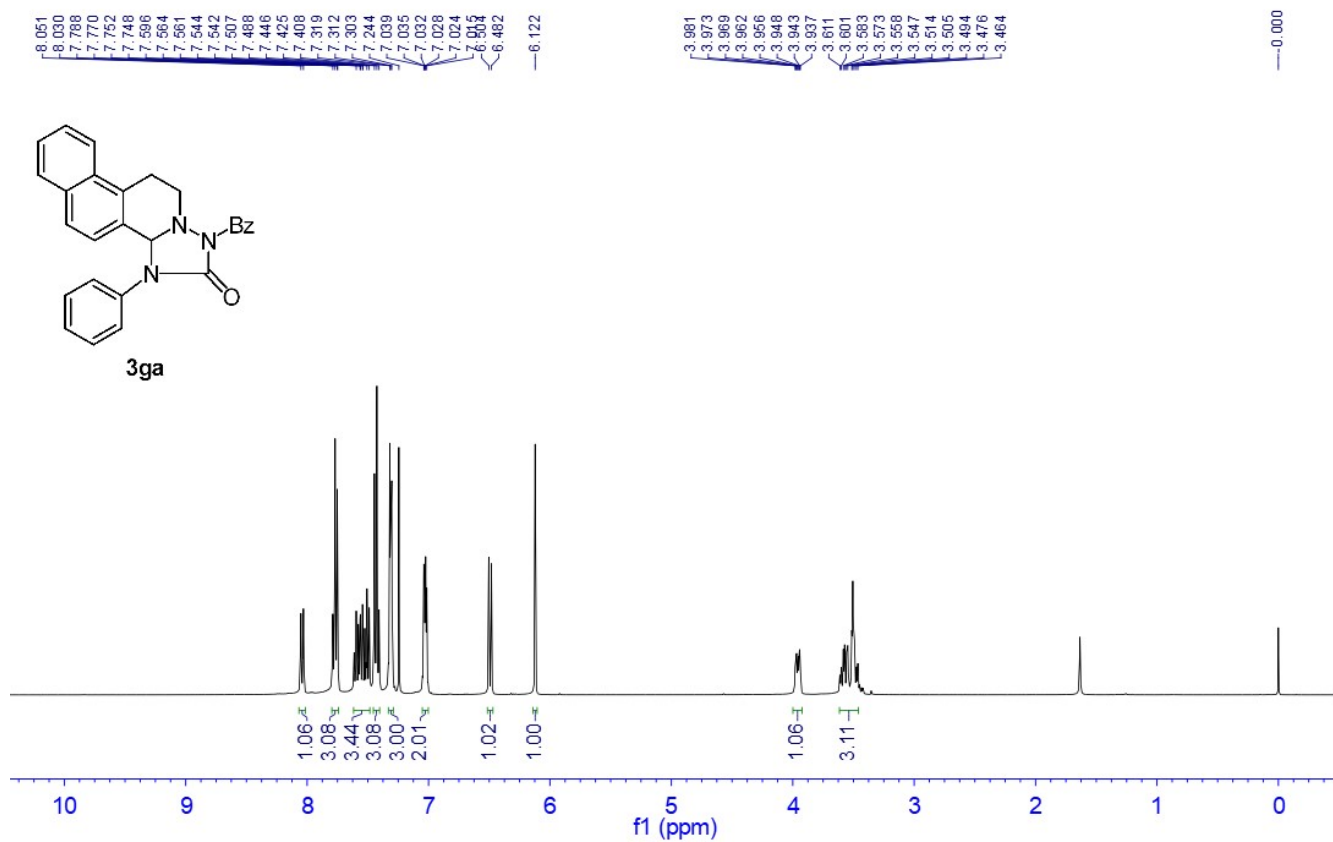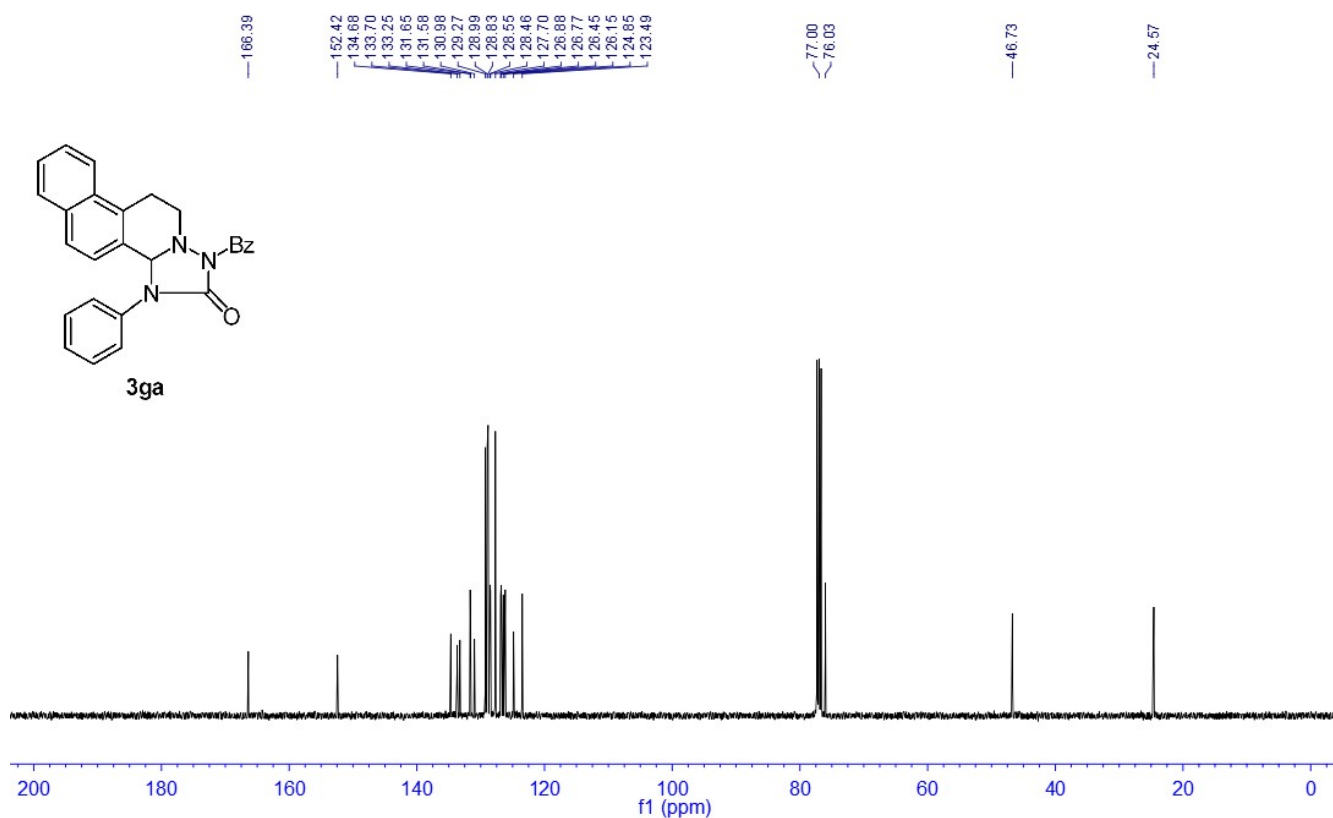

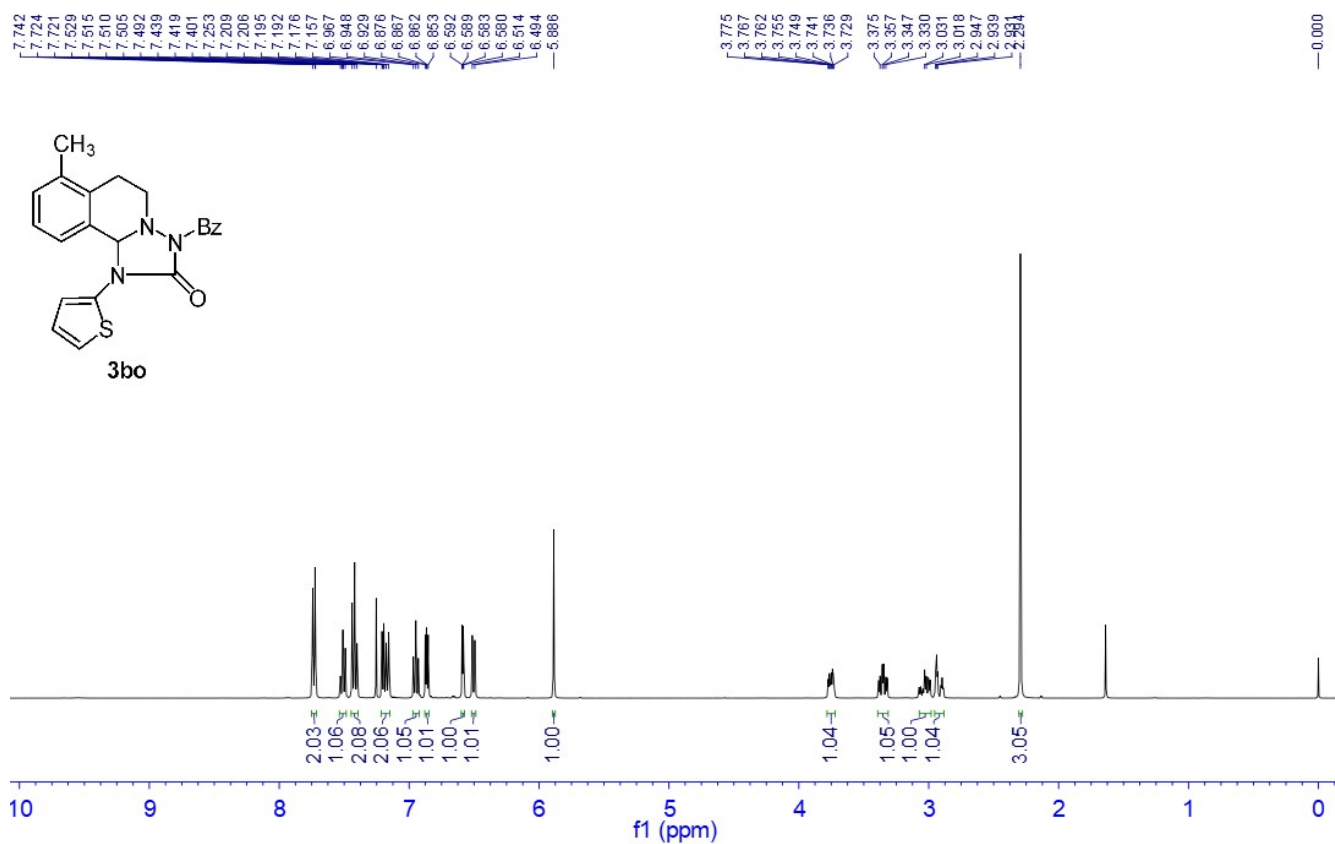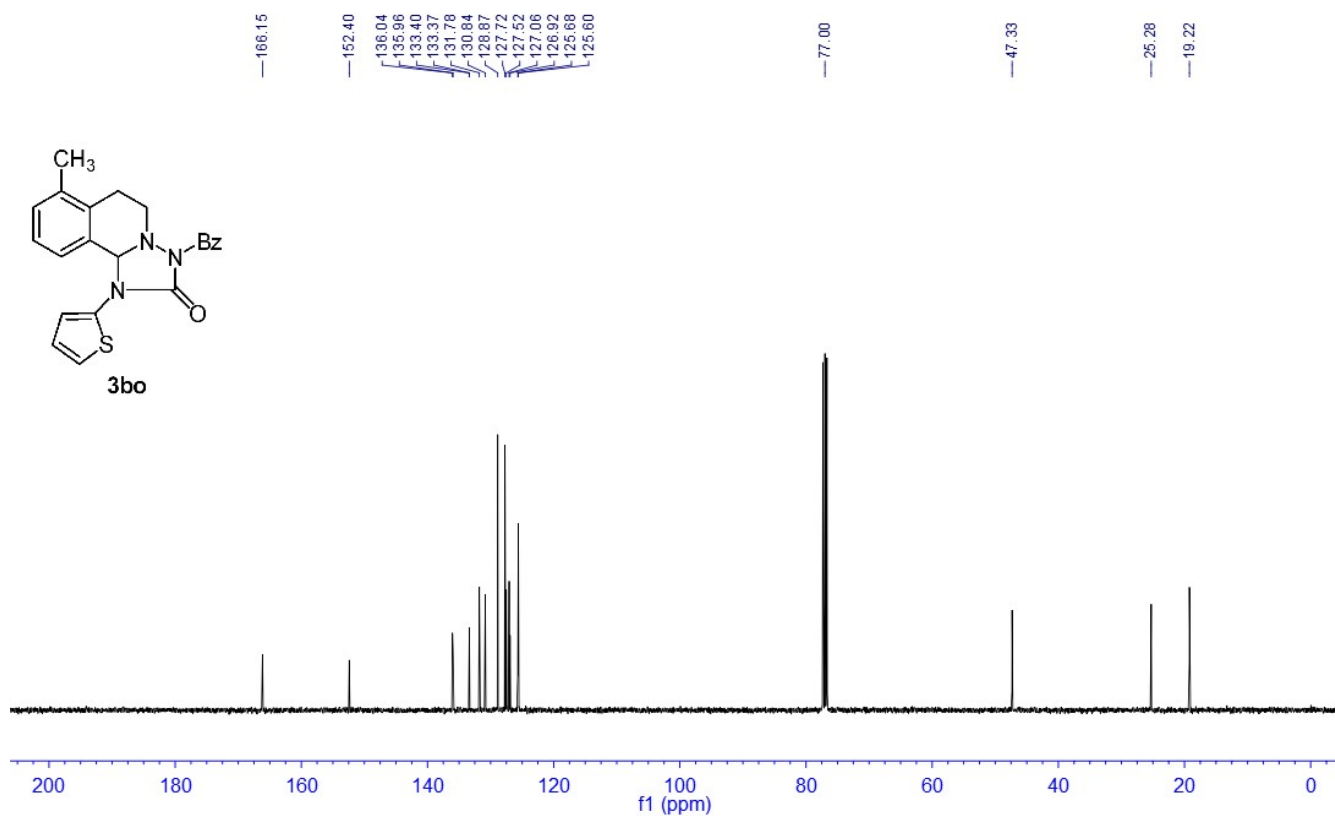



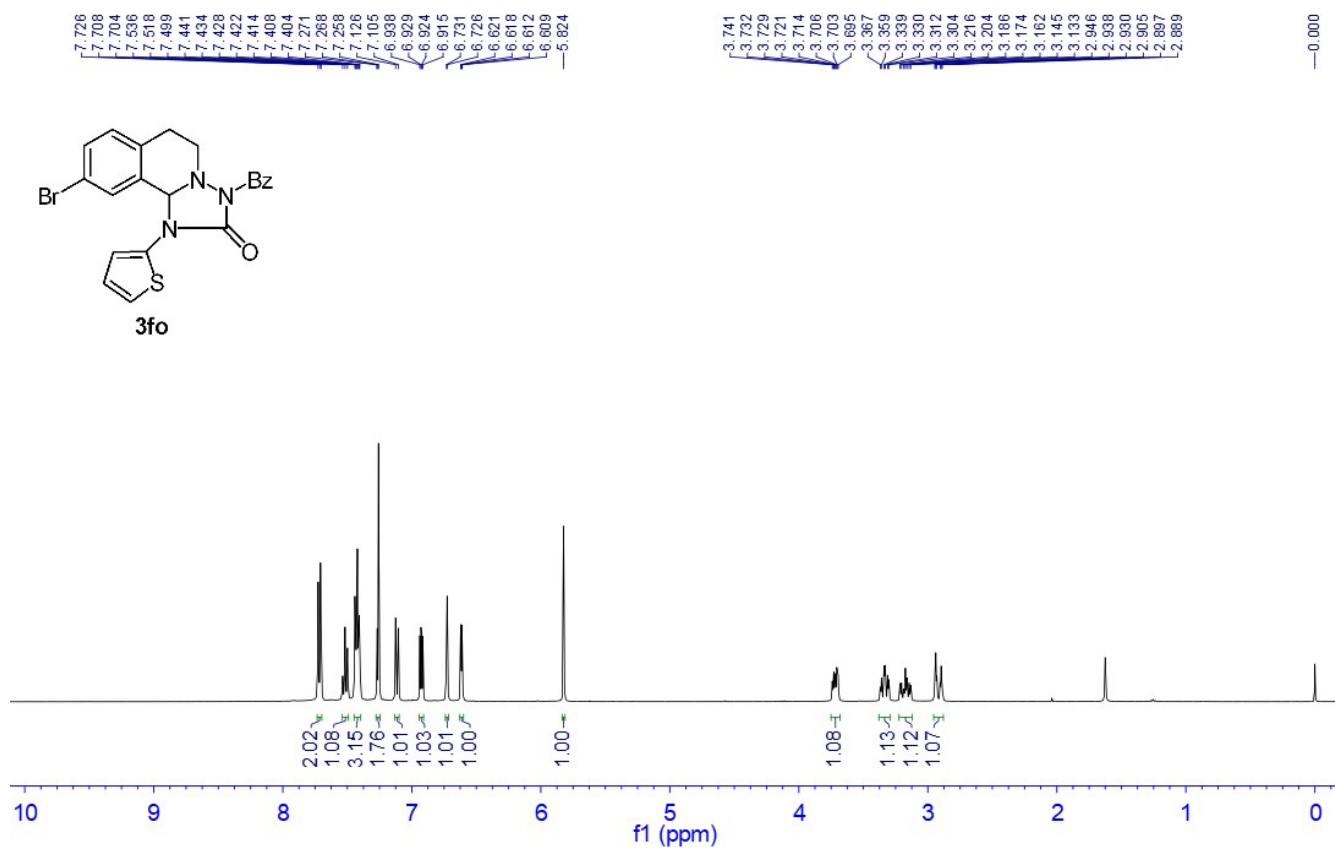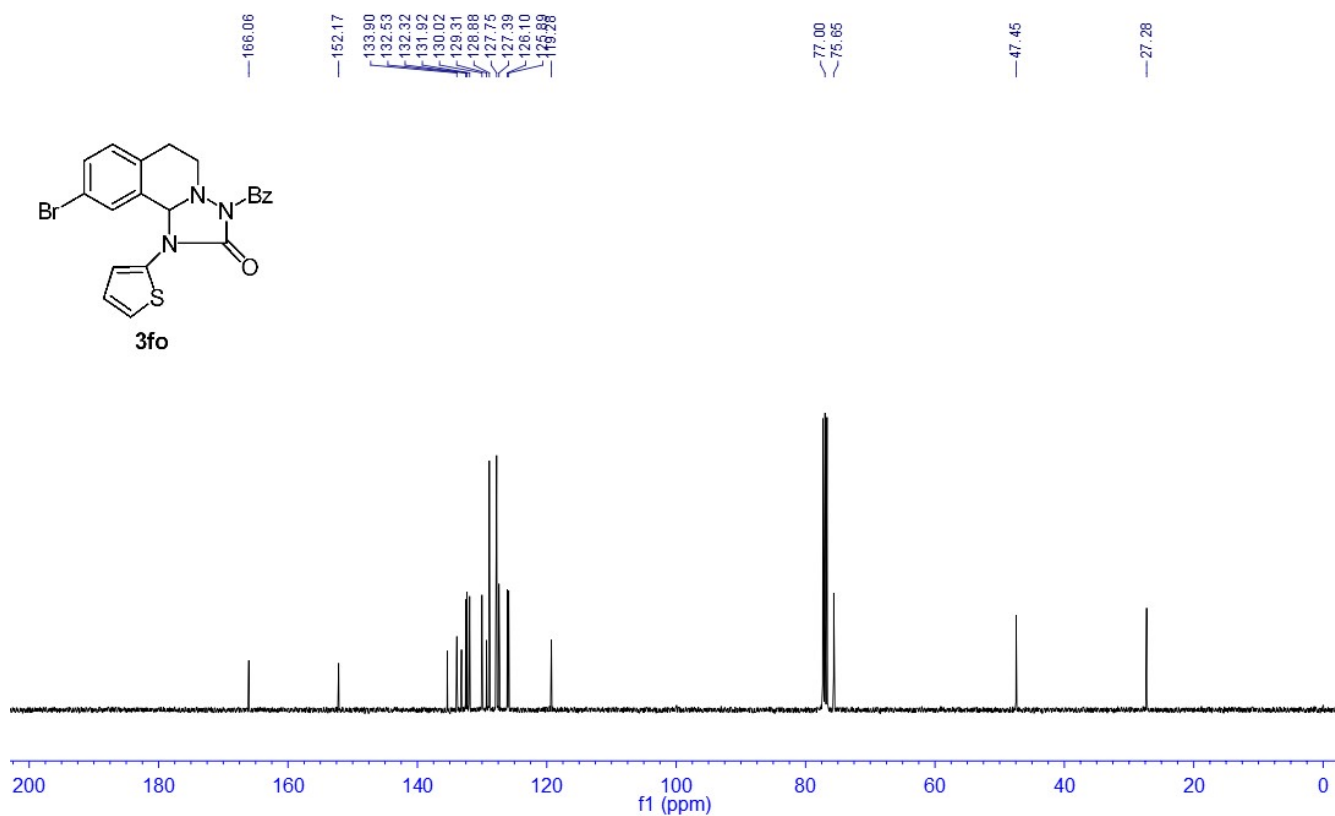

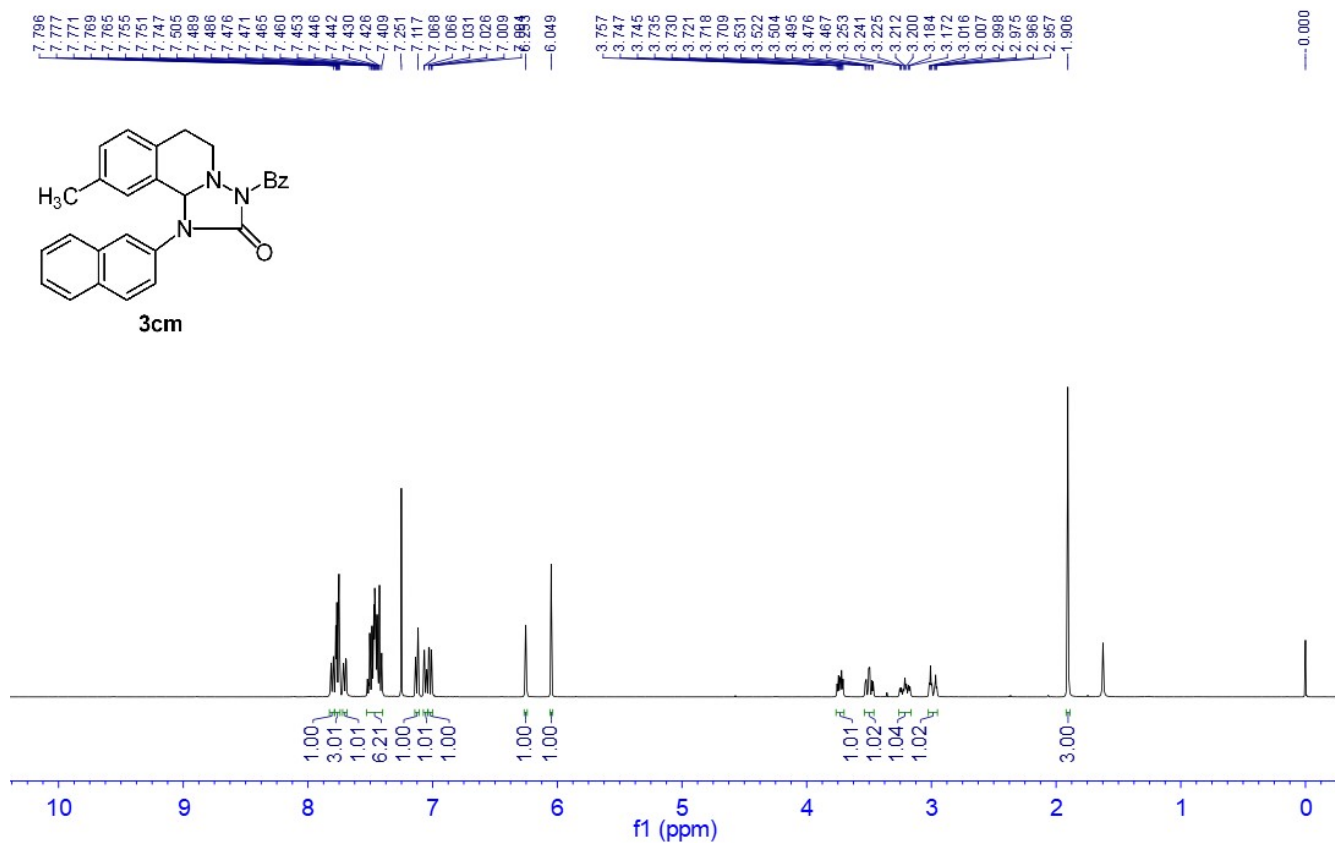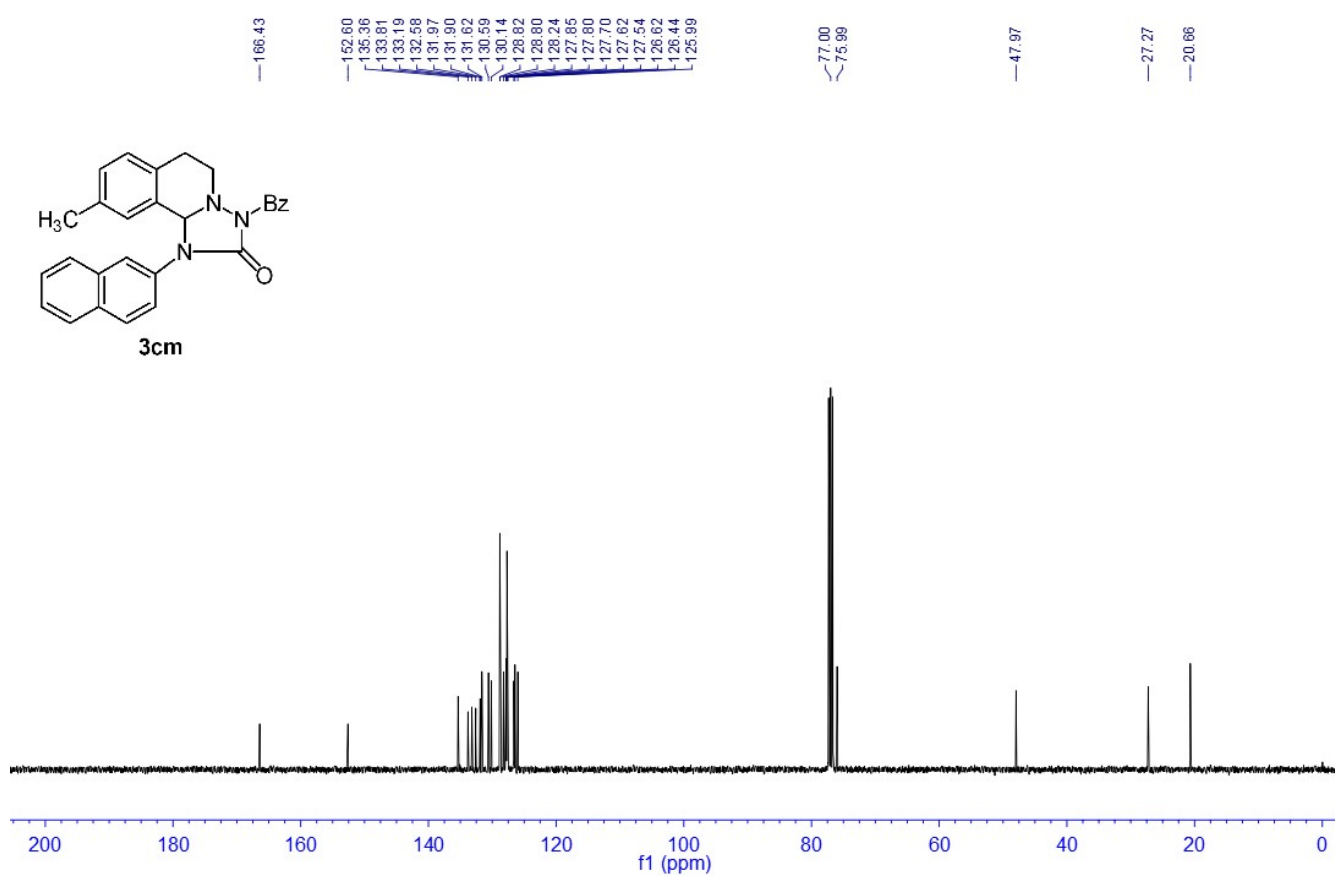

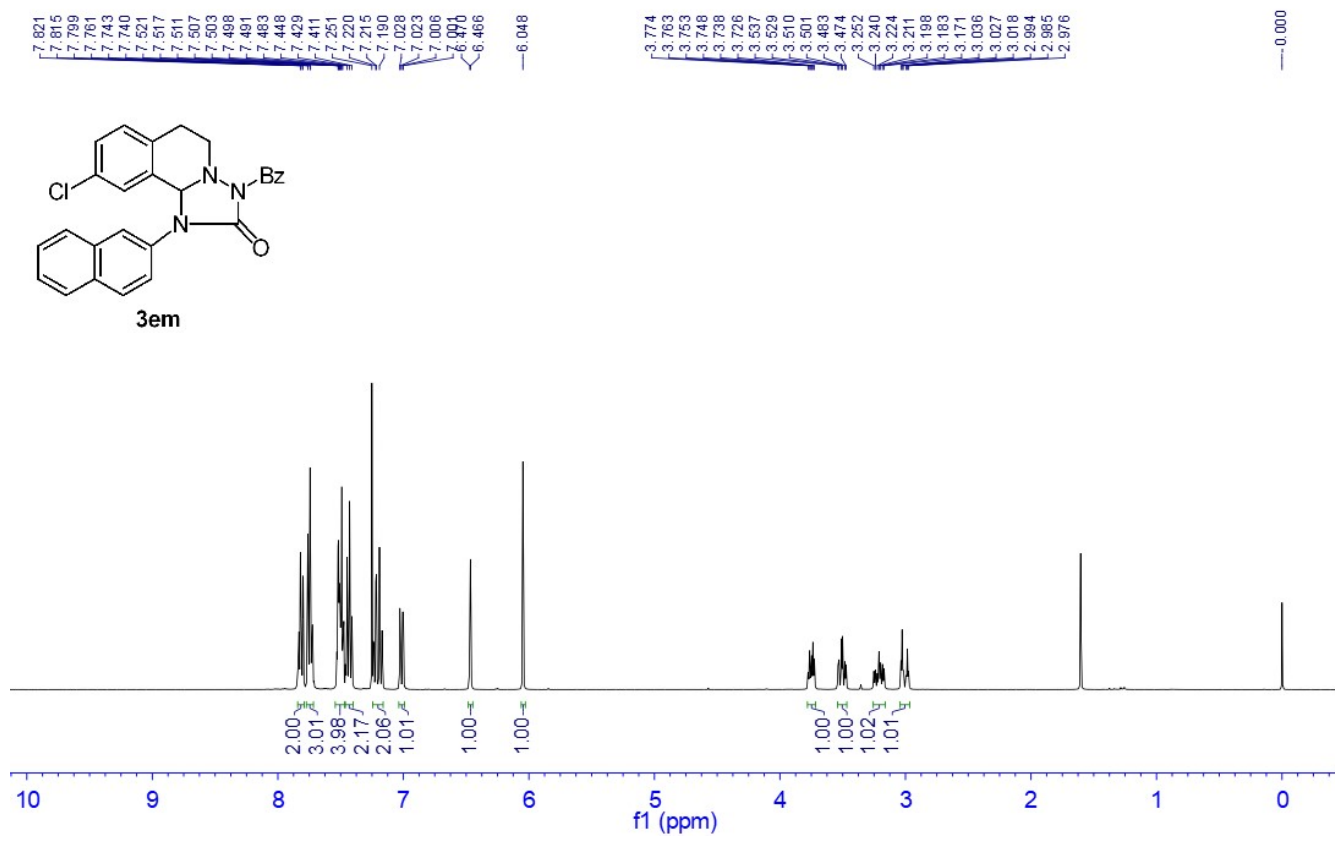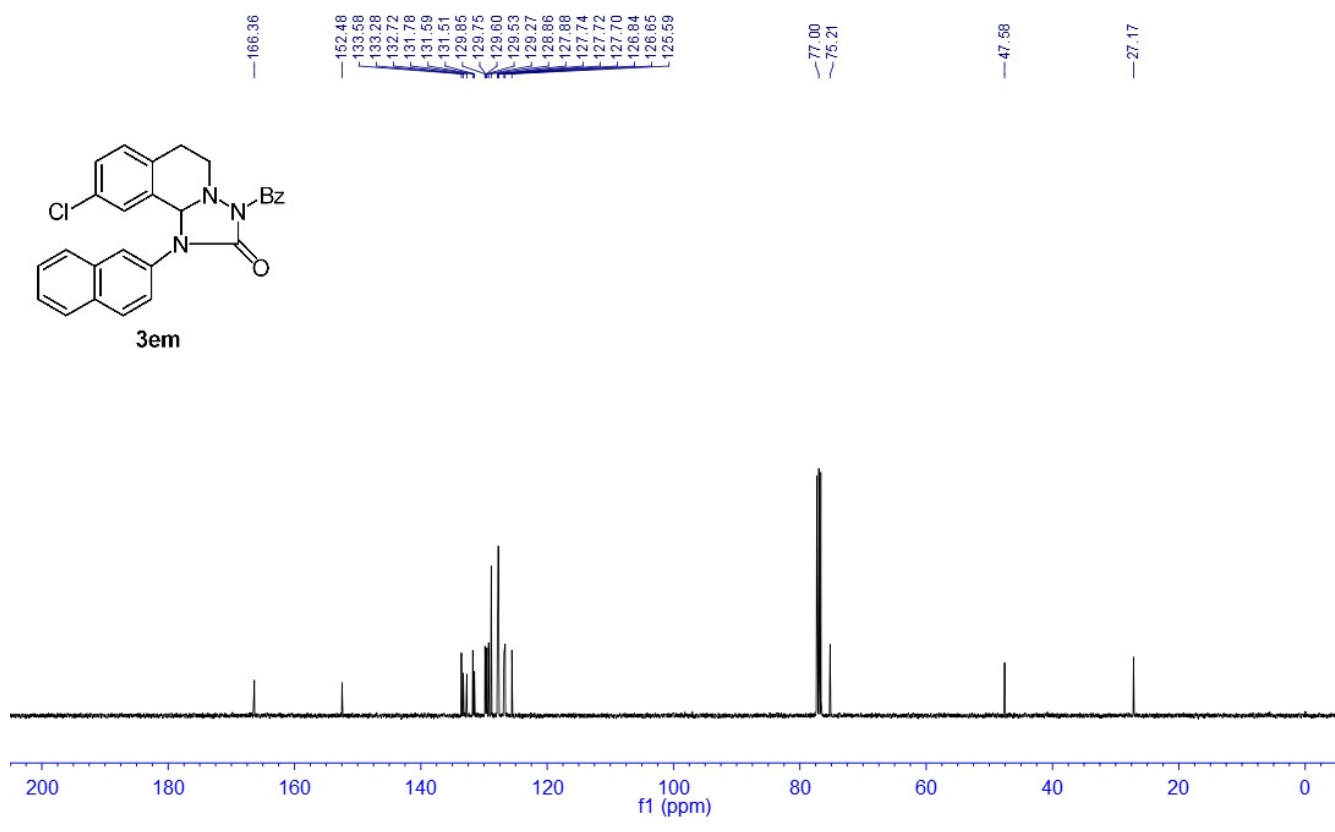

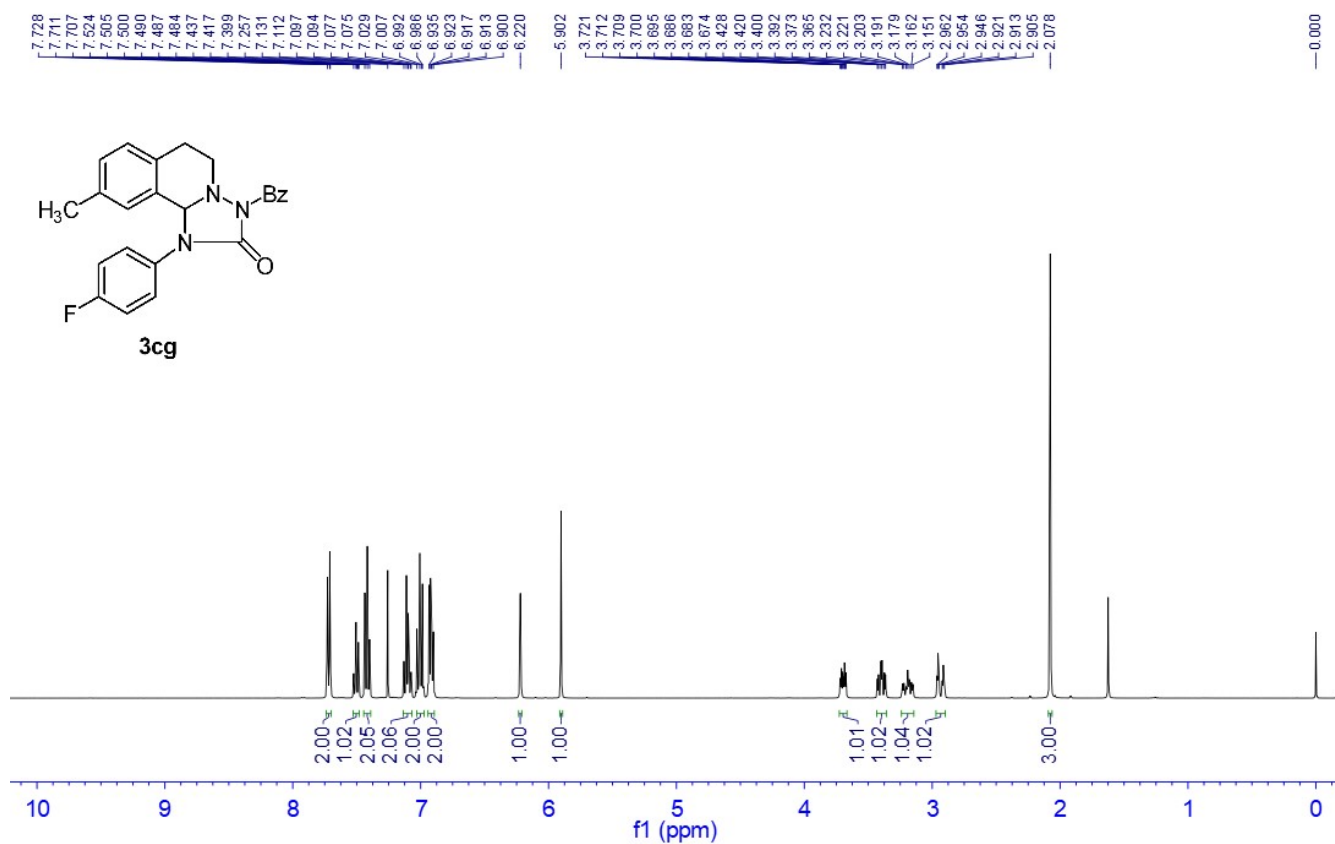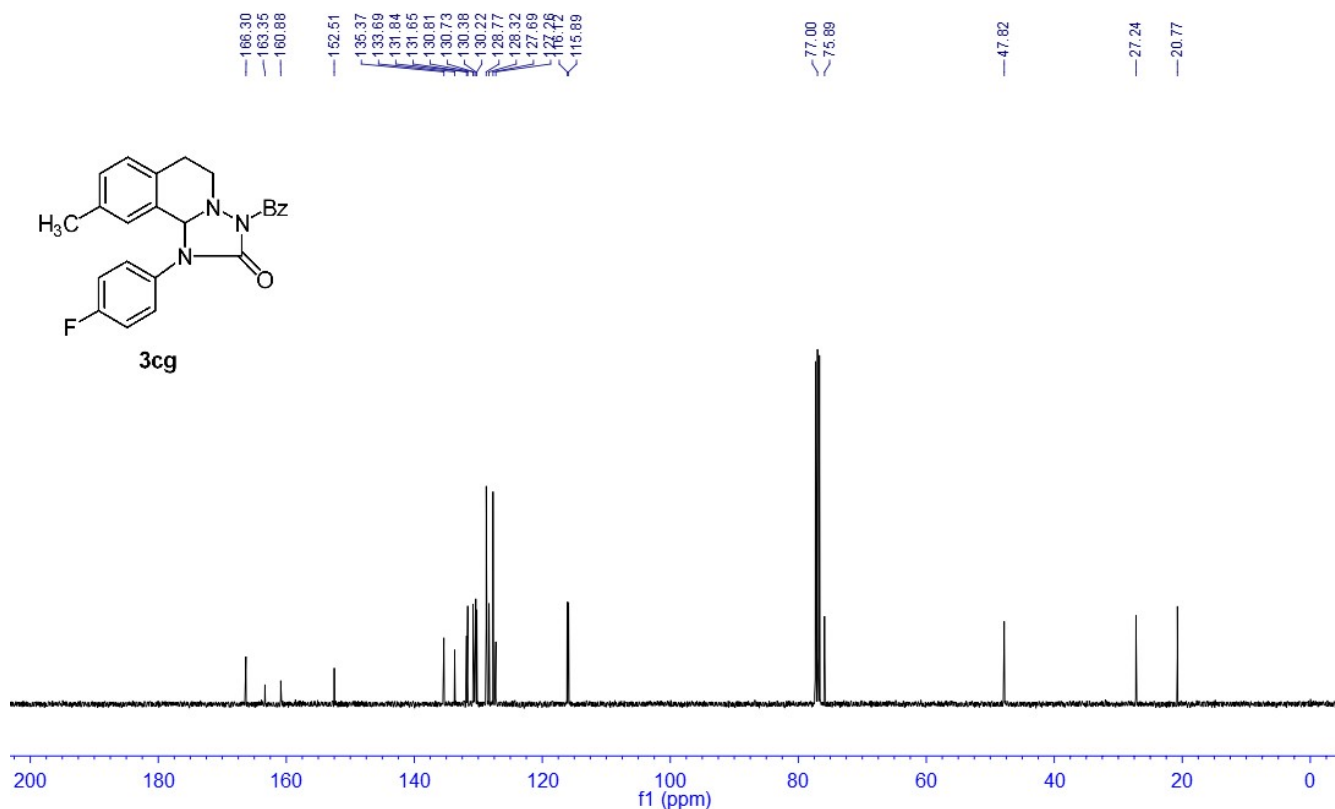

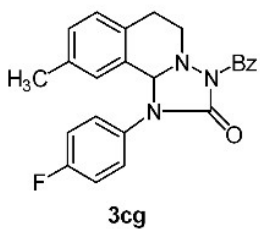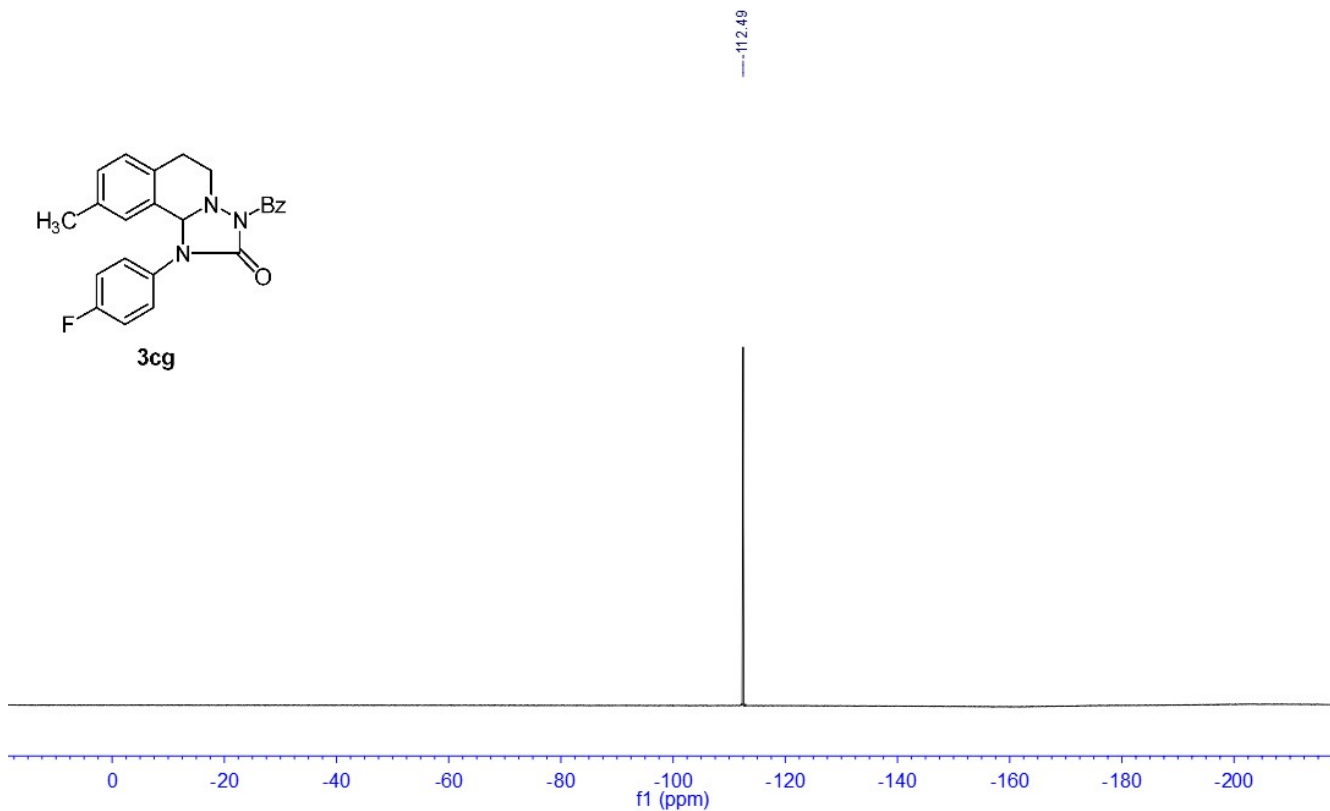

7.729, 7.711, 7.708, 7.509, 7.491, 7.486, 7.475, 7.472, 7.429, 7.409, 7.391, 7.257, 7.115, 7.095, 7.083, 7.080, 7.060, 6.921, 6.654, 6.257, 5.906, 3.712, 3.700, 3.691, 3.686, 3.677, 3.674, 3.665, 3.437, 3.428, 3.409, 3.401, 3.382, 3.374, 3.228, 3.217, 3.200, 3.188, 3.176, 3.159, 3.147, 2.956, 2.948, 2.940, 2.915, 2.907, 2.898, 2.221, 2.067, 0.000

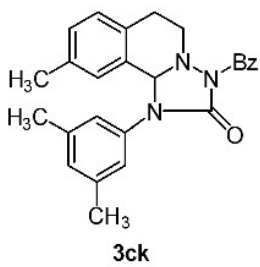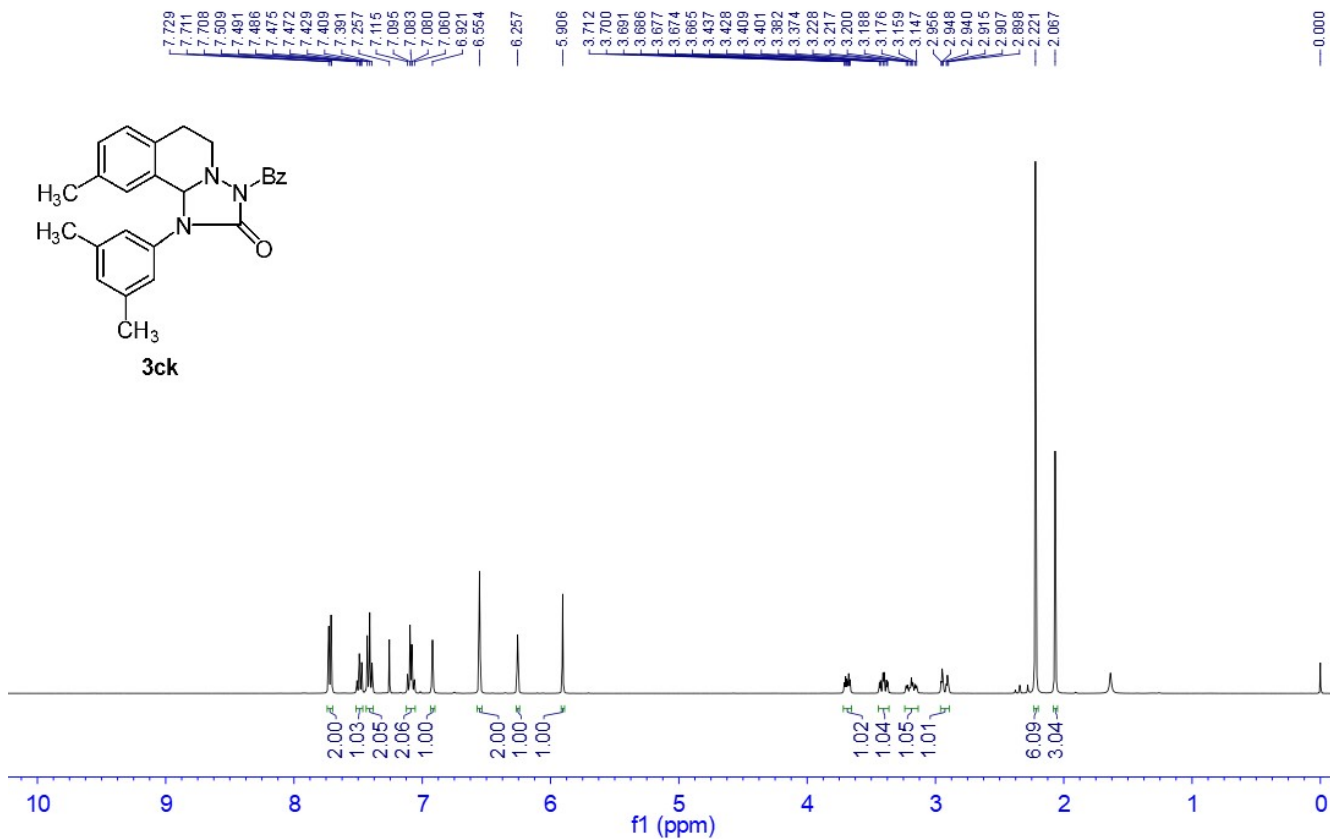

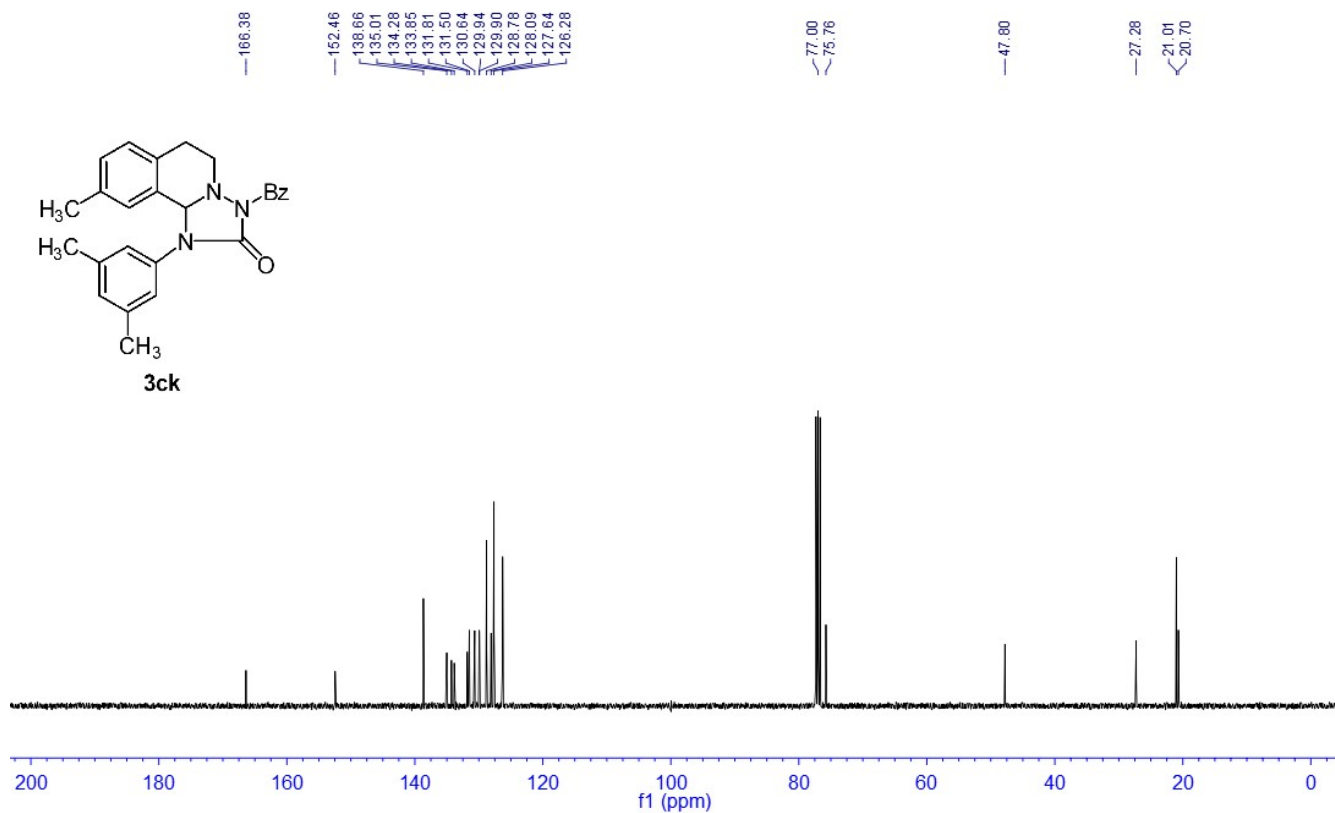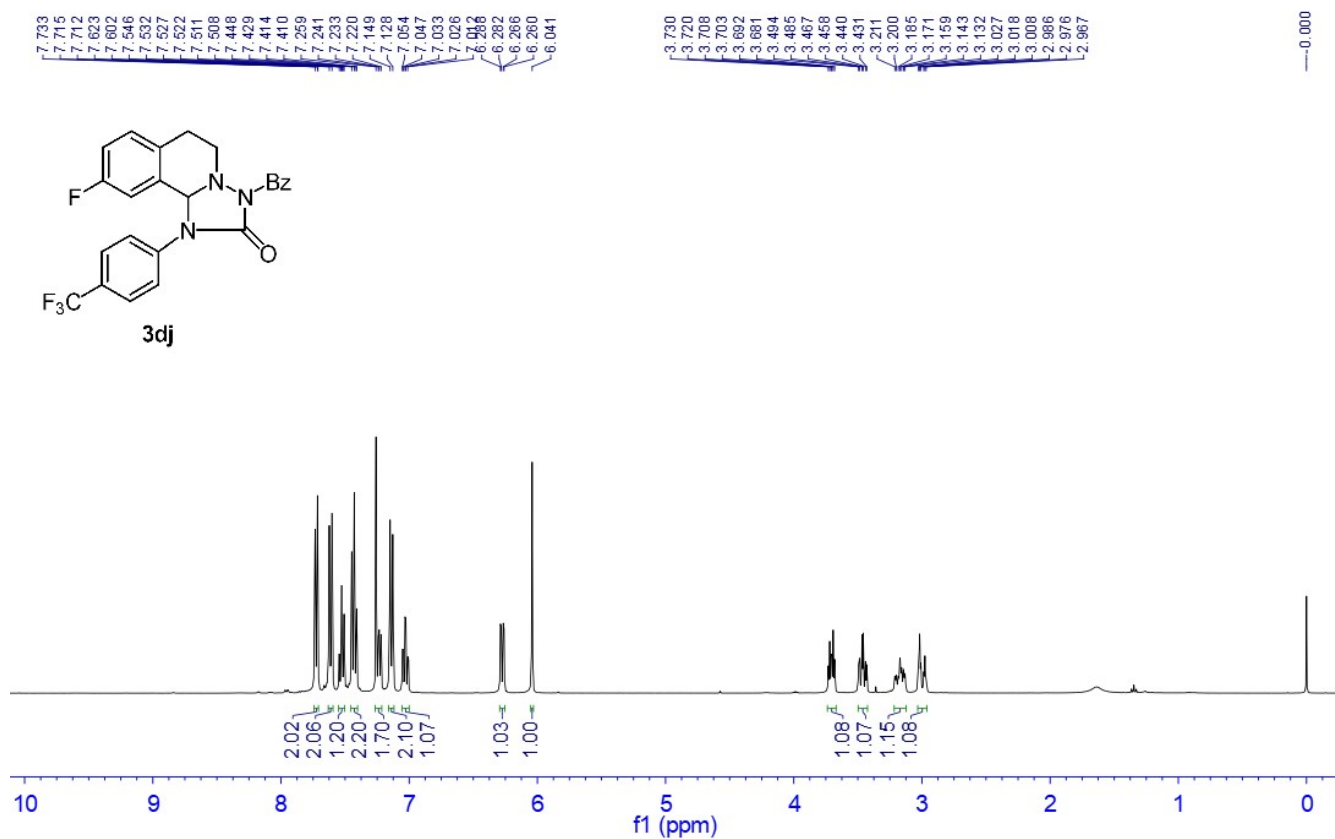

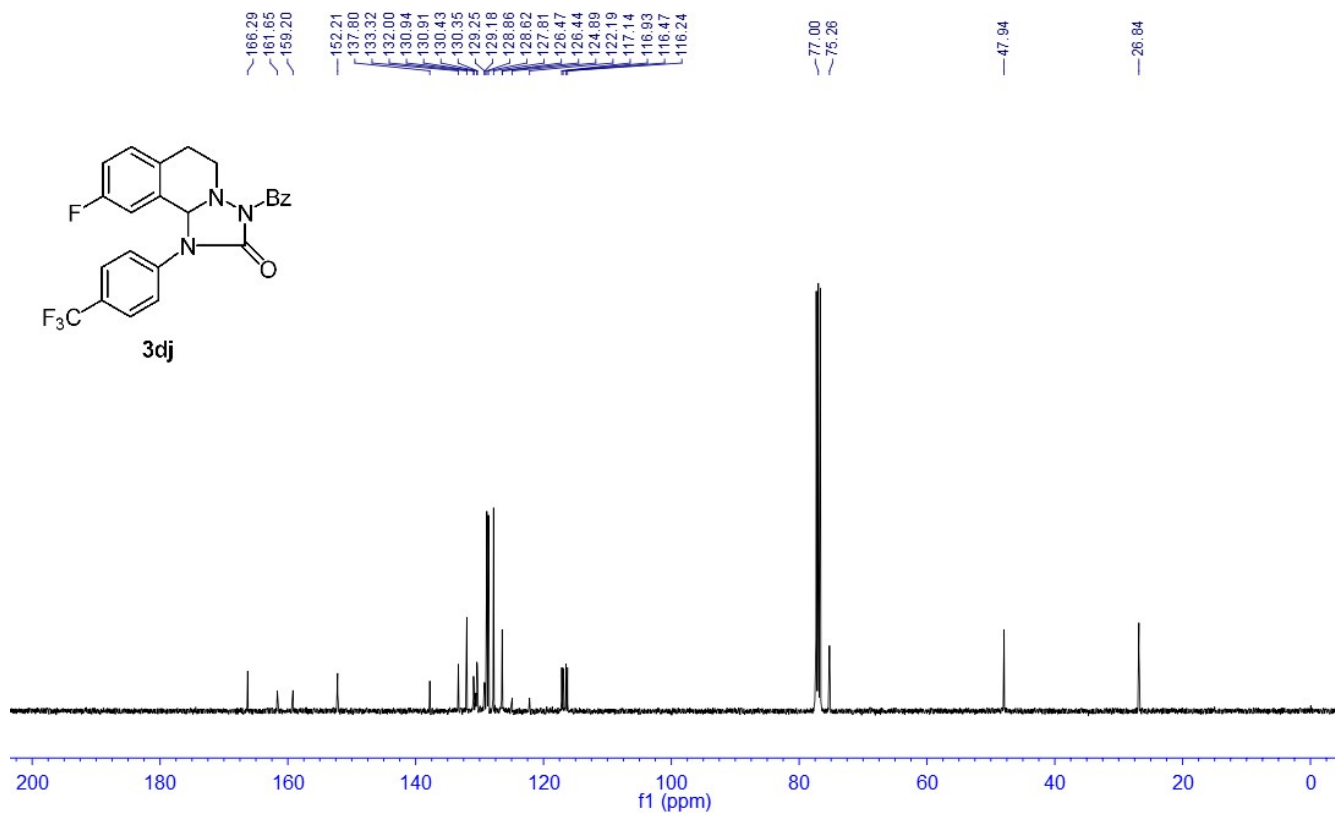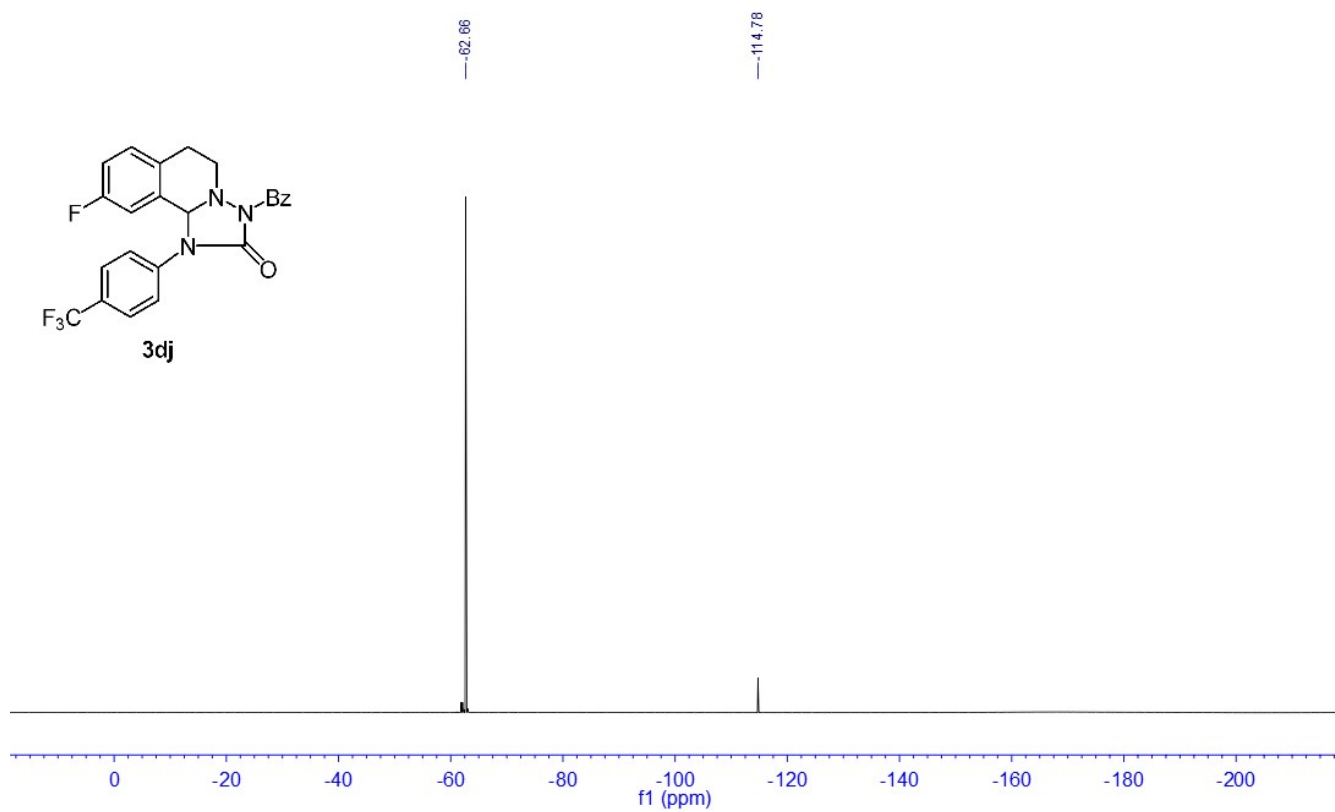

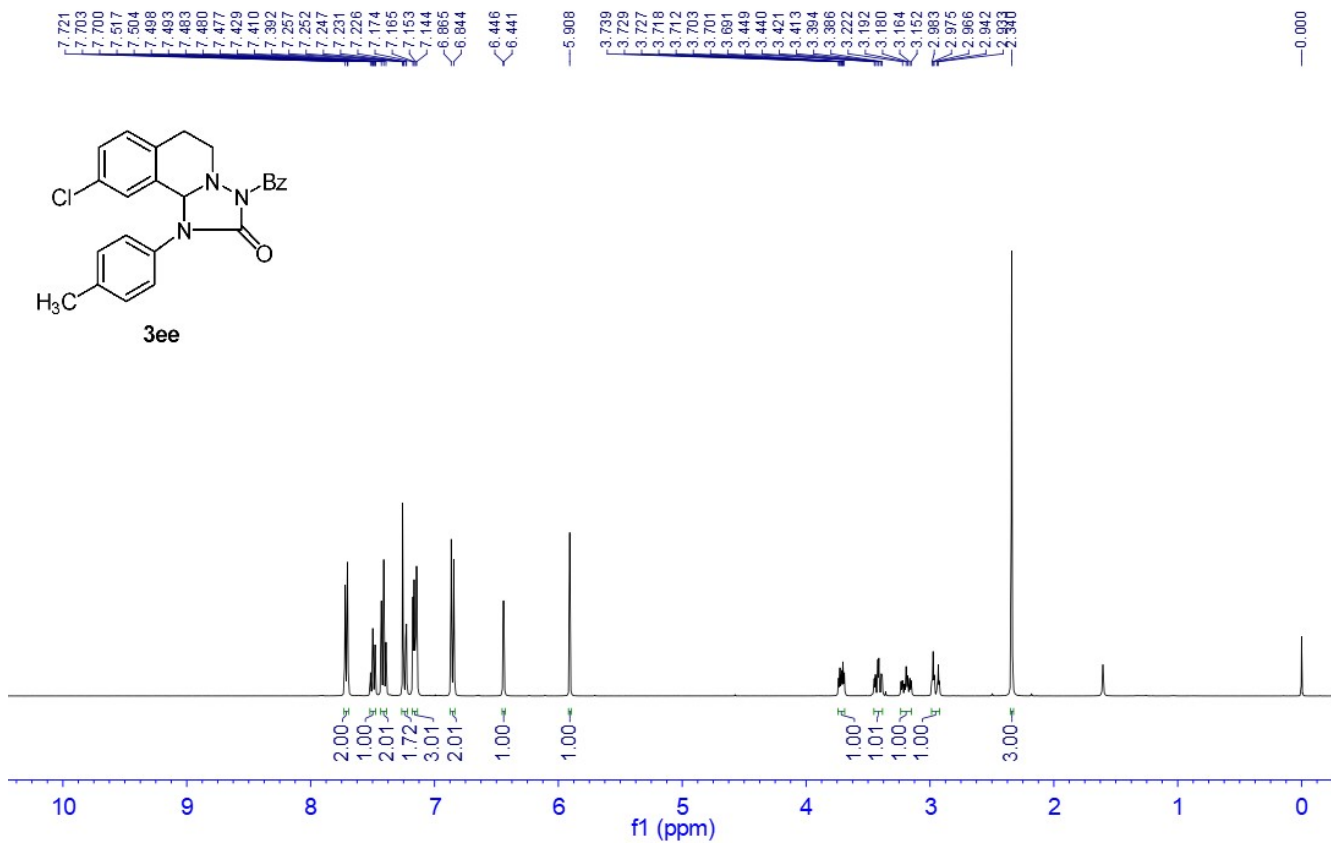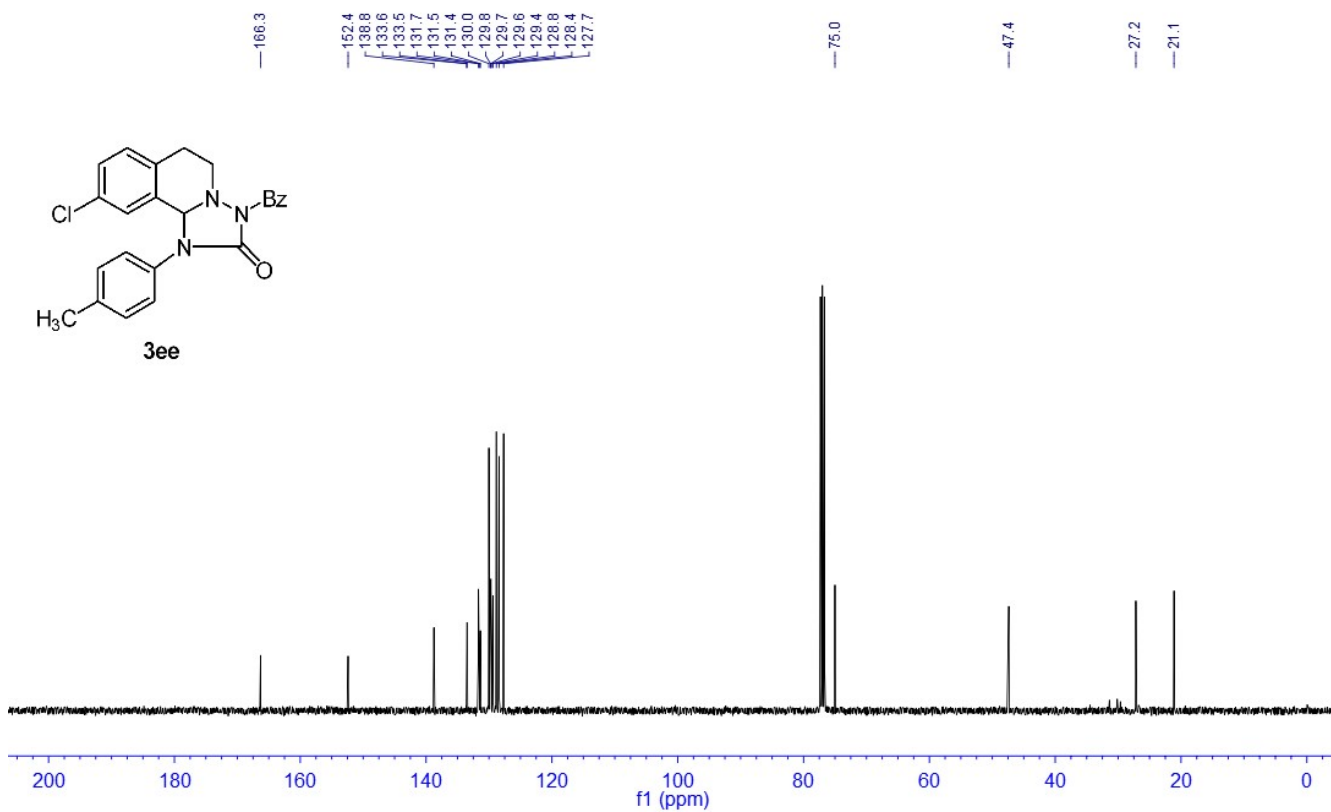



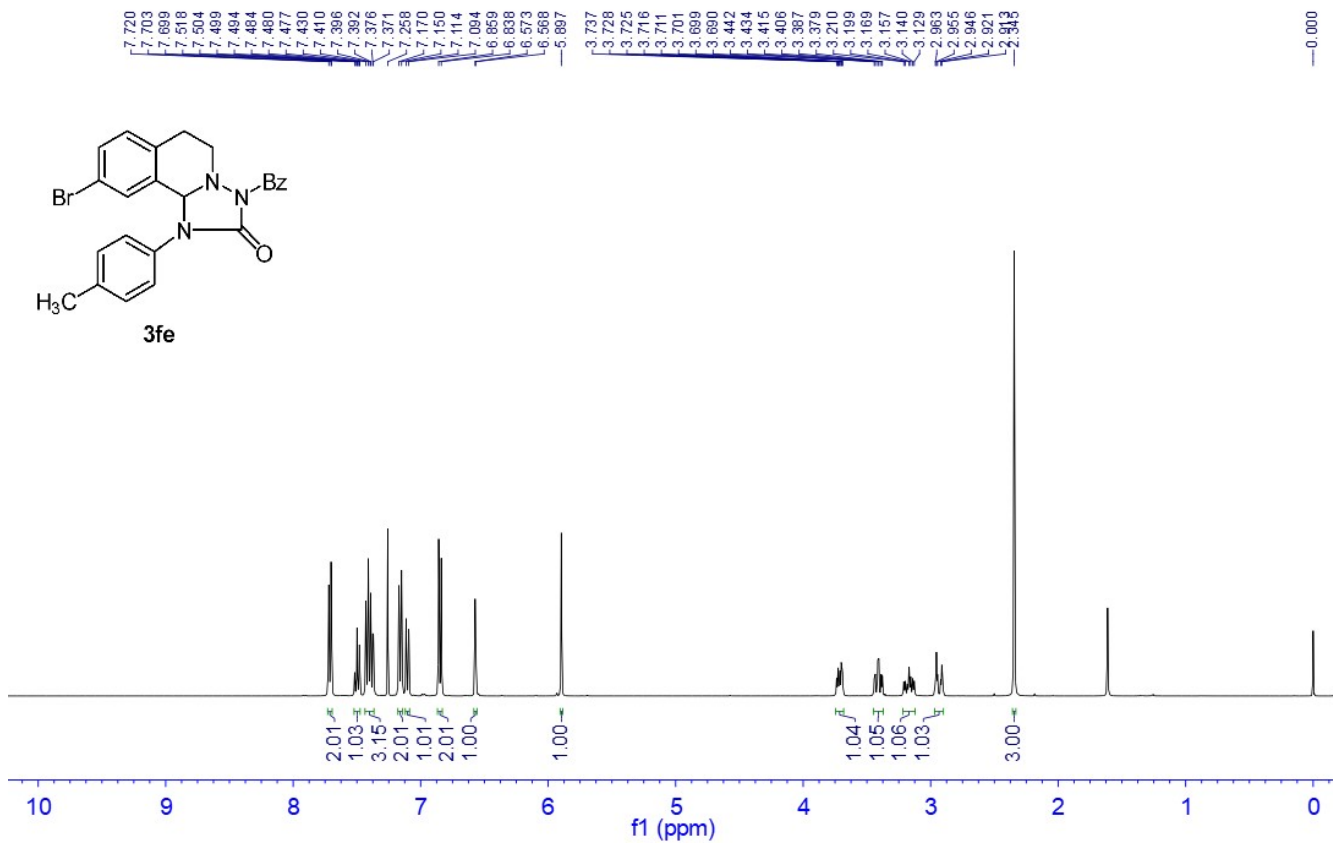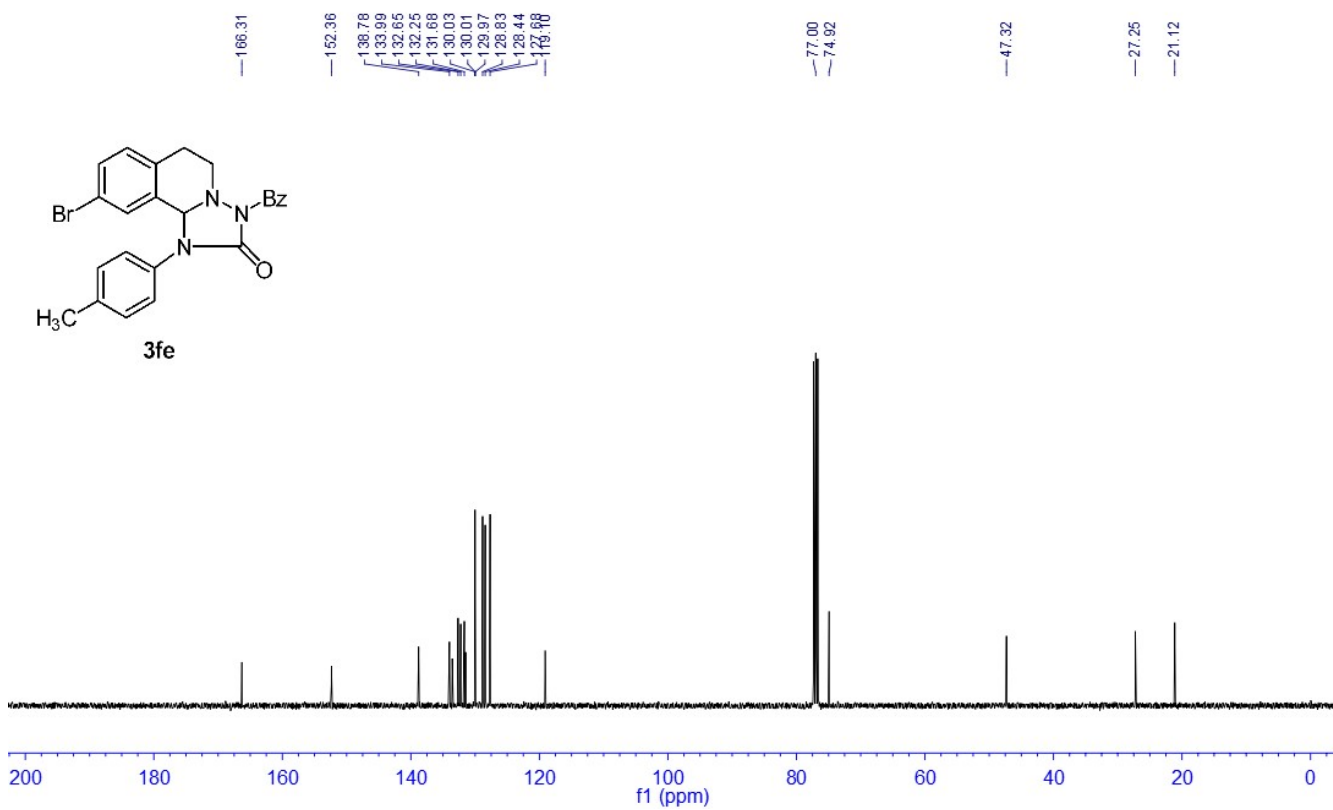

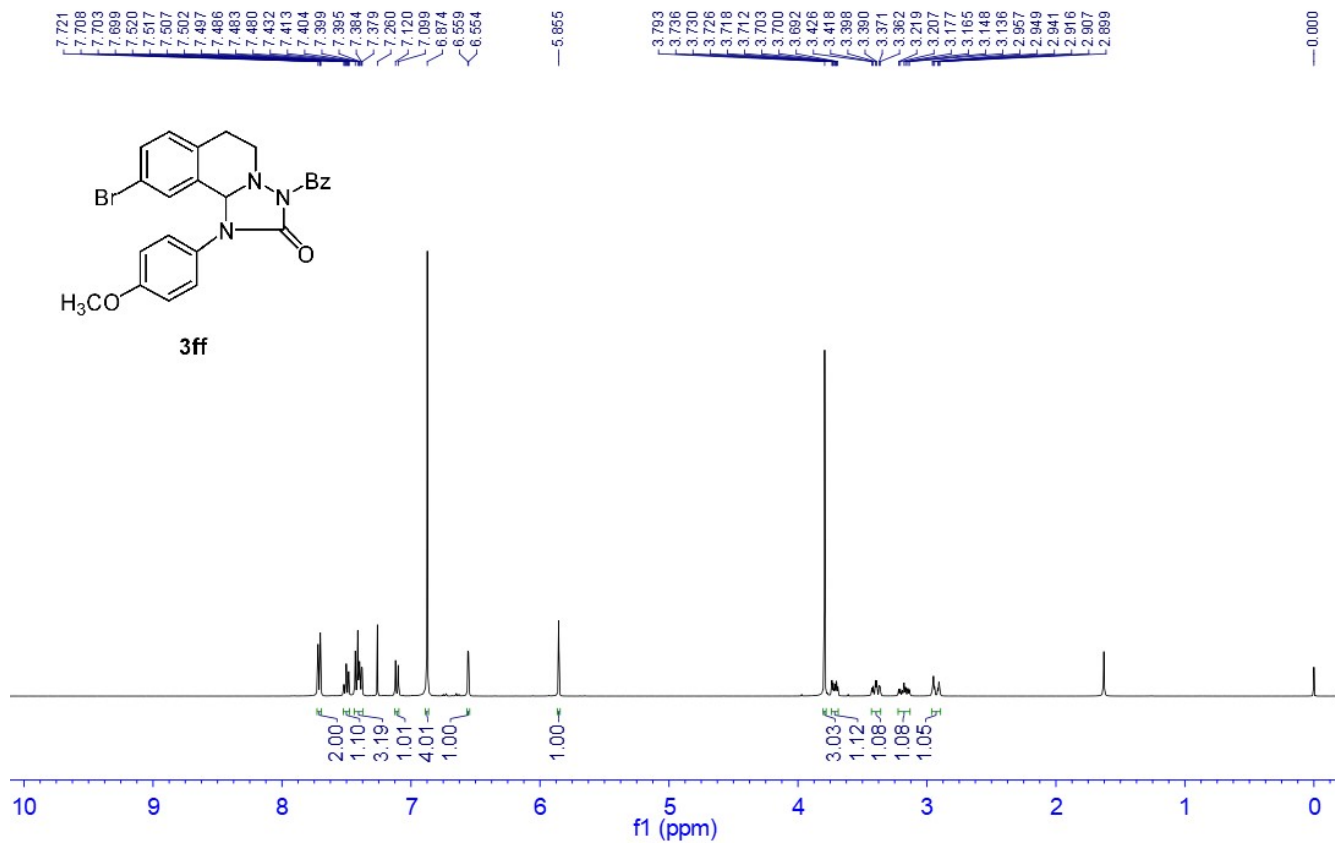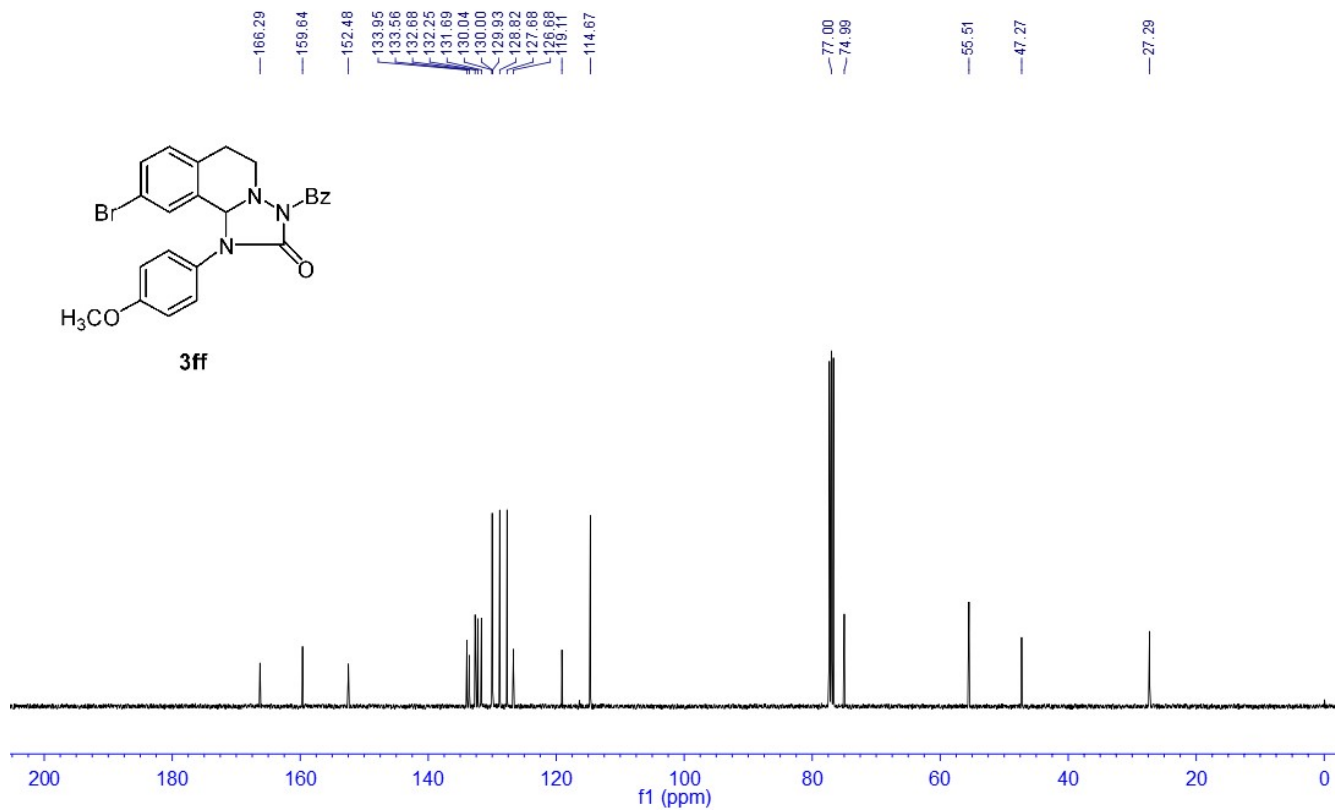

Supplement: d3gc04556k1.pdf [file d3gc04556k1.pdf]
